# Supplementary material
Source: PubMed Central journal article supplement (PMC6499393)
Supplement: NIHMS1517840-supplement-1.pdf [file NIHMS1517840-supplement-1.pdf]

## SUPPLEMENTARY DATA FILE

### **Efficient Synthetic Methodology for the Construction of Dihydronaphthalene and Benzosuberene Molecular Frameworks**

Deboprosad Mondal<sup>1, †</sup>, Haichan Niu<sup>1, †</sup>, and Kevin G. Pinney<sup>1, \*</sup>

<sup>1</sup> Department of Chemistry and Biochemistry, Baylor University, One Bear Place # 97348, Waco, Texas 76798-7438, United States

<sup>†</sup> Authors contributed equally to the work.

\* Corresponding author: Tel.: +1 254 710 4117

e-mail address: Kevin\_Pinney@baylor.edu

## Supplementary Data Table of Contents

|                                                                                                 |     |
|-------------------------------------------------------------------------------------------------|-----|
| Experimental Section                                                                            | S1  |
| <sup>1</sup> H NMR and <sup>13</sup> C NMR of compound 6                                        | S12 |
| <sup>1</sup> H NMR and <sup>13</sup> C NMR of compound 7                                        | S13 |
| <sup>1</sup> H NMR and <sup>13</sup> C NMR of compound 8                                        | S14 |
| <sup>1</sup> H NMR and <sup>13</sup> C NMR of compound 9                                        | S15 |
| <sup>1</sup> H NMR, <sup>13</sup> C NMR, HRMS, and HPLC of compound 1                           | S16 |
| <sup>1</sup> H NMR, <sup>13</sup> C NMR, <sup>19</sup> F NMR of compound 10                     | S21 |
| <sup>1</sup> H NMR, <sup>13</sup> C NMR, HRMS, HPLC, and<br>X-ray Crystallography of compound 2 | S23 |
| <sup>1</sup> H NMR and <sup>13</sup> C NMR of compound 13                                       | S39 |
| <sup>1</sup> H NMR and <sup>13</sup> C NMR of compound 14                                       | S40 |
| <sup>1</sup> H NMR and <sup>13</sup> C NMR of compound 15                                       | S41 |
| <sup>1</sup> H NMR and <sup>13</sup> C NMR of compound 16                                       | S42 |
| <sup>1</sup> H NMR, <sup>13</sup> C NMR, HRMS, and HPLC of compound 3                           | S43 |
| <sup>1</sup> H NMR, <sup>13</sup> C NMR, <sup>19</sup> F NMR of compound 17                     | S51 |
| <sup>1</sup> H NMR, <sup>13</sup> C NMR, HRMS, and HPLC of compound 4                           | S53 |
| Scale-Up Experimental Section                                                                   | S62 |

## General Materials and Methods

Tetrahydrofuran (THF), carbon tetrachloride, dichloromethane, methanol, dimethylformamide (DMF), and acetonitrile were used in their anhydrous forms. Reactions were performed under nitrogen gas, unless otherwise specified. Thin-layer chromatography (TLC) plates (precoated glass plates with silica gel 60 F254, 0.25 mm thickness) were used to monitor reactions. Purification of intermediates and products was carried out with a Biotage Isolera flash purification system using silica gel (200-400 mesh, 60 Å) or RP-18 pre-packed columns or manually in glass columns. Intermediates and products synthesized were characterized on the basis of their <sup>1</sup>H NMR (500 or 600 MHz), <sup>13</sup>C NMR (125 or 150 MHz) spectroscopic data using a Varian VNMRS 500 MHz or Bruker DPX 600 MHz instrument. Spectra were recorded in CDCl<sub>3</sub>, D<sub>2</sub>O, (CD<sub>3</sub>)<sub>2</sub>CO, or CD<sub>3</sub>OD. All chemical shifts are expressed in ppm (δ), and peak patterns are reported as broad (br), singlet (s), doublet (d), triplet (t), quartet (q), pentet (p), sextet (sext), septet (sept), double doublet (dd), double double doublet (ddd), and multiplet (m).

Purity of the final compounds was further analyzed at 25 °C using an Agilent 1200 HPLC system with a diode-array detector (λ = 190–400 nm), a Zorbax XDB-C18 HPLC column (4.6 mm Å~ 150 mm, 5 μm), and a Zorbax reliance cartridge guard-column; Method: solvent A, acetonitrile, solvent B, H<sub>2</sub>O; gradient, 10% A/ 90% B to 100% A/ 0% B over 0 to 40 min; post-time 10 min; flow rate 1.0mL/min; injection volume 20 μL; monitored at wavelengths of 210, 230, 254, 280, and 320 nm. Mass spectrometry was carried out under positive or negative ESI (electrospray ionization) using a Thermo Scientific LTQ Orbitrap Discovery instrument.

**2-Isopropoxy-3-methoxybenzaldehyde (6, NHC\_3\_94).** To a well-stirred solution of 2-hydroxy-3-methoxybenzaldehyde (5.00 g, 32.9 mmol) in DMF (100 mL) was added K<sub>2</sub>CO<sub>3</sub> (14.97 g, 98.58 mmol) and 2-iodopropane (6.54 mL, 65.7 mmol). After heating at 50 °C for 20 h,

DMF was removed under reduced pressure, and the resulting material was washed with water (100 mL) to remove the excess salt and extracted with EtOAc (3 x 100 mL). The combined organic phase was dried over sodium sulfate and concentrated to afford protected aldehyde **6** (6.24 g, 32.2 mmol, 98%) as a colorless oil without further purification. <sup>1</sup>H NMR (600 MHz, CDCl<sub>3</sub>) δ 10.44 (1H, s), 7.41 (1H, d, *J* = 7.8 Hz), 7.10 (2H, m), 4.62 (1H, m), 3.86 (3H, s), 1.31 (6H, d, *J* = 6 Hz). <sup>13</sup>C NMR (150 MHz, CDCl<sub>3</sub>) δ 191.0, 153.4, 150.7, 131.0, 123.7, 119.0, 118.0, 76.3, 56.1, 22.4.

**5-(2-Isopropoxy-3-methoxyphenyl)pentanoic acid (7, NHC\_5\_114/118).** 3-(Carboxypropyl)triphenyl phosphonium bromide (11.54 g, 26.89 mmol) was dissolved in DMF (350 mL) followed by the addition of potassium *tert*-butoxide (8.08 g, 71.7 mmol). The resultant reaction mixture was stirred at room temperature for 45 min. Aldehyde **6** (3.48 g, 17.9 mmol) in THF (50 mL) was added slowly, and the reaction mixture was stirred at room temperature for an additional 24 h. The solvent was removed under reduced pressure, and the resulting material was acidified with 2 M HCl (70 mL) and extracted with EtOAc (3 x 100 mL). The combined organic layer was evaporated under reduced pressure, and the crude product was dissolved in CH<sub>3</sub>OH (60 mL) without further purification. 10% palladium on carbon (1.9 g) and hydrogen gas were introduced, and the reaction mixture was stirred for 24 h at room temperature followed by filtration through Celite®, and the Celite® was further washed with EtOAc (3 x 50 mL). The combined organic phase (CH<sub>3</sub>OH and EtOAc) was evaporated under reduced pressure. The resulting organic material was purified by flash chromatography using a pre-packed 100 g silica column [solvent A: EtOAc; solvent B: hexanes; gradient: 7%A / 93%B (1 CV), 7%A / 93%B → 40%A / 60%B (10 CV), 40%A / 60%B (2 CV); flow rate: 100 mL/min; monitored at 254 and 280 nm] to afford carboxylic acid **7** (4.51 g, 16.9 mmol, 94%) as a yellow oil. <sup>1</sup>H NMR (600

MHz, CDCl<sub>3</sub>) δ 6.95 (1H, t, *J* = 7.8 Hz), 6.77 (1H, d, *J* = 7.8 Hz), 6.75 (1H, d, *J* = 7.8 Hz), 4.46 (1H, sept, *J* = 6 Hz), 2.66 (2H, t, *J* = 7.8 Hz), 2.38 (2H, 7.2 Hz), 1.66 (4H, m), 1.27 (6H, d, *J* = 6 Hz) <sup>13</sup>C NMR (150 MHz, CDCl<sub>3</sub>) δ 179.9, 153.0, 145.0, 136.6, 123.3, 121.8, 110.1, 74.6, 55.7, 34.0, 29.9, 29.8, 24.7, 22.8.

**1-Isopropoxy-2-methoxy-6,7,8,9-tetrahydro-5H-benzo[7]annulen-5-one (8, NHC\_5\_121).**<sup>1</sup>

To a solution of carboxylic acid **7** (0.92 g, 3.5 mmol) in CH<sub>2</sub>Cl<sub>2</sub> (20 mL) was added DMF (0.15 mL) and oxalyl chloride (1.51 mL, 17.3 mmol). The solution was stirred at room temperature for 2 h. The solvent and excess reagent were removed under reduced pressure to afford the acyl chloride as a yellow solid. The acyl chloride was dissolved in CH<sub>2</sub>Cl<sub>2</sub> (20 mL), and SnCl<sub>4</sub> (3.80 mL, 1 M, 3.80 mmol) was added to the solution at -10 °C, and the reaction mixture was stirred for 40 min. The reaction mixture was quenched by the addition of water (30 mL) followed by extraction with CH<sub>2</sub>Cl<sub>2</sub> (3 x 40 mL). The combined organic phase was dried over sodium sulfate and concentrated under reduced pressure. The crude product was purified by flash chromatography using a pre-packed 50 g silica column [solvent A: EtOAc; solvent B: hexanes; gradient: 2%A / 98%B (1 CV), 2%A / 98%B → 40%A / 60%B (10 CV), 40%A / 60%B (2 CV); flow rate: 100 mL/min; monitored at 254 and 280 nm] to afford ketone **8** (0.65 g, 2.6 mmol, 75%) as a clear oil. <sup>1</sup>H NMR (600 MHz, CDCl<sub>3</sub>) δ 7.46 (1H, d, *J* = 9 Hz), 6.78 (1H, d, *J* = 9 Hz), 4.38 (1H, sept, *J* = 6.6 Hz), 3.83 (3H, s), 2.99 (2H, t, *J* = 6 Hz), 2.65 (2H, m), 1.75 (4H, m), 1.25 (6H, d, *J* = 6 Hz). <sup>13</sup>C NMR (150 MHz, CDCl<sub>3</sub>) δ 204.9, 156.1, 143.7, 136.2, 132.8, 124.8, 109.5, 74.9, 55.6, 40.6, 24.8, 23.8, 22.5, 21.0.

**4-Isopropoxy-3-methoxy-9-(3,4,5-trimethoxyphenyl)-6,7-dihydro-5H-benzo[7]annulene (9, NHC\_5\_122/124).**<sup>1</sup> To an oven dried flask, THF (50 mL) and 1,2,3-trimethoxy phenyl bromide (1.00 g, 4.05 mmol) were added, and the solution was cooled to -78 °C. *n*-BuLi (1.63 mL, 2.5 M,

4.05 mmol) was slowly added to the reaction mixture, which was then stirred at  $-78\text{ }^{\circ}\text{C}$  for 30 min. Ketone **8** (0.51 g, 2.0 mmol) in THF (20 mL) was added dropwise to the flask, and the reaction mixture was stirred while warming from  $-78\text{ }^{\circ}\text{C}$  to room temperature over 16 h. The reaction mixture was washed with 2 M HCl (30 mL) for 30 min and extracted with EtOAc (3 x 50 mL). The combined organic phase was dried over sodium and evaporated under reduced pressure. The crude product was purified by flash chromatography using a pre-packed 50 g silica column [solvent A: EtOAc; solvent B: hexanes; gradient: 7%A / 93%B (1 CV), 7%A / 98%B  $\rightarrow$  40%A / 60%B (10 CV), 40%A / 60%B (2 CV); flow rate: 100 mL/min; monitored at 254 and 280 nm] to afford benzosuberene **9** (0.68 g, 1.7 mmol, 84%) as a yellow solid.  $^1\text{H}$  NMR (600 MHz,  $\text{CDCl}_3$ )  $\delta$  6.73 (2H, s), 6.47 (2H, s), 6.32 (1H, t,  $J = 7.2$  Hz), 4.50 (1H, sept, 6H), 3.85 (3H, s), 3.84 (3H, s), 3.79 (6H, s), 2.77 (2H, t,  $J = 7.2$  Hz), 2.13 (3H, m), 1.95 (2H, m), 1.33 (6H, d, 6H).  $^{13}\text{C}$  NMR (150 MHz,  $\text{CDCl}_3$ )  $\delta$  152.9, 151.8, 143.9, 143.0, 138.7, 137.4, 136.6, 133.8, 127.1, 125.0, 109.4, 105.4, 74.8, 61.0, 56.2, 55.7, 34.4, 25.8, 24.5, 22.8.

**3-Methoxy-9-(3,4,5-trimethoxyphenyl)-6,7-dihydro-5H-benzo[7]annulen-4-ol (1, NHC\_5\_128, KGP18).**<sup>1,2</sup> To a solution of isopropyl-protected phenol **9** (0.52 g, 1.3 mmol) in  $\text{CH}_2\text{Cl}_2$  (15 mL) was added  $\text{BCl}_3$  (1.44 mL, 1 M, 1.44 mmol) at  $0\text{ }^{\circ}\text{C}$ . The solution was stirred for 2 h, followed by the addition of water, and subsequent extraction with  $\text{CH}_2\text{Cl}_2$  (3 x 30 mL). The combined organic phase was dried over sodium sulfate, and evaporated under reduced pressure. The crude reaction product was purified by flash chromatography using a pre-packed 50 g silica column [solvent A: EtOAc; solvent B: hexanes; gradient: 2%A / 98%B (1 CV), 2%A / 98%B  $\rightarrow$  30%A / 70%B (10 CV), 30%A / 70%B (2 CV); flow rate: 100 mL/min; monitored at 254 and 280 nm] to afford phenol **1** (0.42 g, 1.2 mmol, 92%) as a white solid.  $^1\text{H}$  NMR (600 MHz,  $\text{CDCl}_3$ )  $\delta$  6.71 (1H, d,  $J = 8.4$  Hz), 6.57 (1H, d,  $J = 8.4$  Hz), 6.50 (2H, s), 6.33 (1H, t,  $J = 7.2$  Hz),

3.91 (3H, s), 3.86 (3H, s), 3.80 (6H, s), 2.76 (2H, t,  $J = 7.2$  Hz), 2.14 (2H, m), 1.97 (2H, m).  $^{13}\text{C}$  NMR (150 MHz,  $\text{CDCl}_3$ )  $\delta$  152.9, 145.2, 142.5, 138.6, 137.4, 134.4, 127.9, 127.3, 120.9, 61.0, 56.2, 56.1, 33.7, 25.8, 23.7. HRMS: Obsvd 379.1517 [ $\text{M} + \text{Na}^+$ ], Calcd for  $\text{C}_{21}\text{H}_{24}\text{O}_5\text{Na}$ : 379.1516, HPLC: 9.52 min.

**3-Methoxy-9-(3,4,5-trimethoxyphenyl)-6,7-dihydro-5H-benzo[7]annulen-4-yl**

**trifluoromethanesulfonate (10, NHC\_5\_149).** To a solution of phenol **1** (0.13 g, 0.36 mmol) in  $\text{CH}_2\text{Cl}_2$  (20 mL) was added TEA (0.056 mL, 0.72 mmol) and triflic anhydride (0.051 mL, 0.54 mmol). The reaction mixture was stirred at 0 °C for 5 h, followed by the addition of water and subsequent extraction with  $\text{CH}_2\text{Cl}_2$  (3 x 20 mL). The combined organic phase was dried over sodium sulfate and evaporated under reduced pressure. The resulting material was purified by flash chromatography using a pre-packed 50 g silica column [solvent A: EtOAc; solvent B: hexanes; gradient: 12%A / 88%B (1 CV), 12%A / 88%B  $\rightarrow$  50%A / 50%B (10 CV), 50%A / 50%B (2 CV); flow rate: 100 mL/min; monitored at 254 and 280 nm] to afford triflic product **10** (0.15 g, 0.31 mmol, 84%) as a yellow solid.  $^1\text{H}$  NMR (600 MHz,  $\text{CDCl}_3$ )  $\delta$  7.04 (1H, d,  $J = 8.4$  Hz), 6.87 (1H, d,  $J = 8.4$  Hz), 6.47 (2H, s), 6.43 (1H, t,  $J = 7.2$  Hz), 3.93 (3H, s), 3.89 (3H, s), 3.83 (6H, s), 2.79 (2H, m), 2.25 (2H, p,  $J = 7.2$  Hz), 2.00 (2H, m).  $^{13}\text{C}$  NMR (150 MHz,  $\text{CDCl}_3$ )  $\delta$  153.1, 150.0, 141.8, 137.8, 136.7, 136.4, 134.4, 130.0, 129.8, 128.5, 110.5, 110.0, 105.4, 61.0, 56.3, 56.1, 34.1, 25.5, 25.4.  $^{19}\text{F}$  NMR (564 MHz,  $\text{CDCl}_3$ )  $\delta$  -72.94.

**3-Methoxy-9-(3,4,5-trimethoxyphenyl)-6,7-dihydro-5H-benzo[7]annulen-4-amine (2,**

**DM30901, KGP156).**<sup>3</sup> A toluene solution (15 mL) of triflate **10** (0.74 g, 1.5 mmol),  $\text{Pd}(\text{OAc})_2$  (34 mg, 0.15 mmol), *rac*-BINAP (0.14 g, 0.23 mmol), benzophenone imine (0.254 mL, 2.27 mmol) and  $\text{Cs}_2\text{CO}_3$  (740 mg, 2.27 mmol) was degassed (bubbling nitrogen) for 15 min. The reaction mixture was then heated at 110 °C for 36 h. The reaction mixture was cooled to room

temperature and diluted with EtOAc and quenched with water. The organic phase was separated and dried over sodium sulfate. Solvent was removed and the crude was dissolved in THF and treated with aqueous 2 M HCl to pH 2-3 followed by stirring for 1 h. A NaOH solution (1 M) was added to the reaction to achieve basic pH. The reaction solution was extracted with EtOAc (3 x 30 mL) and the combined organic phase was dried over sodium sulfate and evaporated under reduced pressure. The crude product was purified by flash chromatography using a pre-packed 100 g silica column [solvent A: EtOAc; solvent B: hexanes; gradient: 7%A / 93%B (1 CV), 7%A / 93%B → 60%A / 40%B (10 CV), 60%A / 80%B (2 CV); flow rate: 100 mL/min; monitored at 254 and 280 nm] to afford amine **2** (500 mg, 1.41 mmol, 93%) as a greenish solid. <sup>1</sup>H NMR (600 MHz, CDCl<sub>3</sub>) δ 6.67 (1H, d, *J* = 8.5 Hz), 6.52 (2H, s), 6.48 (1H, d, *J* = 8.5 Hz), 6.30 (1H, t, *J* = 7 Hz), 3.87 (3H, s), 3.86 (3H, s), 3.80 (6H, s), 2.59 (2H, t, *J* = 7 Hz), 2.12 (2H, p, *J* = 7 Hz), 1.95 (2H, m). <sup>13</sup>C NMR (150 MHz, CDCl<sub>3</sub>) δ 152.9, 146.5, 143.7, 138.7, 137.4, 133.7, 132.6, 126.9, 126.4, 119.9, 107.7, 105.4, 61.0, 56.3, 55.7, 33.4, 25.7, 25.4. HRMS: Obsvd 378.1677 [M + Na<sup>+</sup>], Calcd for C<sub>21</sub>H<sub>25</sub>NO<sub>4</sub>Na: 378.1676, HPLC: 20.20 min.

**(3-Hydroxypropyl)triphenylphosphonium bromide (12, NHC\_5\_115).** To a solution of PPh<sub>3</sub> (7.55 g, 28.8 mmol) in toluene (60 mL) was added 3-bromo-1-propanol **11** (5.2 mL, 58 mmol), and the reaction mixture was stirred and heated to reflux for 24 h. The toluene and unreacted 3-bromo-1-propanol were removed under reduced pressure. The solid residue was washed with diethyl ether to remove unreacted triphenylphosphine. The ether suspension was filtered and rinsed with diethyl ether (2 x 50 mL) to afford Wittig salt **12** as a white solid (11.06 g, 27.56 mmol, 96%), which was advanced without further purification.

**4-(2-Isopropoxy-3-methoxyphenyl)butan-1-ol (13, NHC\_5\_117/123).** To a solution of Wittig salt **12** (9.3 g, 23 mmol) in THF (50 mL) was added *n*-BuLi (18.53 mL, 2.5 M, 46.33 mmol)



slowly, and the solution was stirred at 0 °C for 15 min. TMS-Cl (2.94 mL, 23.2 mmol) was added to the reaction mixture which was stirred for 30 min. Aldehyde **6** (3.00 g, 15.5 mmol) was added slowly, the reaction mixture was stirred at 0 °C for 1 h, and then at room temperature for 2 h. 2 M HCl (50 mL) was added, followed by stirring for 30 min at room temperature and subsequent extraction with EtOAc (3 x 50 mL). The combined organic layer was dried over sodium sulfate and concentrated under reduced pressure. The resulting crude material was dissolved in CH<sub>3</sub>OH (60 mL), and Pd/C (1.63 g) and H<sub>2</sub> balloons were introduced. The reaction mixture was stirred for 24 h at room temperature followed by filtration through Celite®. The Celite® was washed with EtOAc (3 x 50 mL). The combined organic phase (CH<sub>3</sub>OH and EtOAc) was evaporated under reduced pressure to afford saturated alcohol **13** (3.39 g, 14.2 mmol, 92%), which was advanced to the next step without further purification. <sup>1</sup>H NMR (600 MHz, CDCl<sub>3</sub>) δ 6.96 (1H, t, 7.8 Hz), 6.78 (1H, d, 7.8 Hz), 6.75 (1H, d, 7.8 Hz), 4.48 (1H, m), 3.83 (3H, s), 3.66 (2H, m), 2.69 (2H, t, *J* = 7.2 Hz), 1.67 (2H, m), 1.60 (2H, m), 1.29 (6H, d, 6.6 Hz). <sup>13</sup>C NMR (150 MHz, CDCl<sub>3</sub>) δ 152.9, 144.8, 136.9, 123.3, 121.8, 110.0, 74.7, 62.8, 55.7, 32.5, 29.8, 26.6, 22.7.

**4-(2-Isopropoxy-3-methoxyphenyl)butanoic acid (14, NHC\_5\_127/130).** To a solution of alcohol **13** (0.60 g, 2.5 mmol) dissolved in water/ acetonitrile (75 mL/ 120 mL) was added Oxone® (2.32 g, 3.78 mmol) and 2-Iodoxybenzoic acid (IBX) (0.21 g, 0.76 mmol). The reaction mixture was stirred at 70 °C for 20 h, and the solvent was removed under reduced pressure. The residue was washed with 2 M HCl (20 mL) and extracted with EtOAc (3 x 30 mL). The combined organic phase was dried over sodium sulfate and evaporated under reduced pressure. The crude product was purified by flash chromatography using a pre-packed 50 g silica column [solvent A: EtOAc; solvent B: hexanes; gradient: 12%A / 88%B (1 CV), 12%A / 88%B →

50%A / 50%B (10 CV), 50%A / 50%B (2 CV); flow rate: 100 mL/min; monitored at 254 and 280 nm] to afford carboxylic **14** (0.29 g, 1.2 mmol, 46%) as a brown oil. <sup>1</sup>H NMR (600 MHz, CDCl<sub>3</sub>) δ 7.47 (1H, t, *J* = 7.8 Hz), 6.77 (2H, m), 4.48 (1H, m), 3.82 (3H, s), 2.72 (2H, m), 2.38 (2H, t, *J* = 7.2 Hz), 1.95 (2H, m), 1.26 (6H, d, *J* = 6.6 Hz). <sup>13</sup>C NMR (150 MHz, CDCl<sub>3</sub>) δ 179.8, 152.9, 144.9, 135.7, 123.3, 121.9, 110.3, 74.5, 55.6, 33.5, 29.4, 25.2, 22.6.

**5-Isopropoxy-6-methoxy-3,4-dihydronaphthalen-1(2H)-one (15, NHC\_5\_132).** To a solution of carboxylic acid **14** (0.29 g, 1.2 mmol) in CH<sub>2</sub>Cl<sub>2</sub> (20 mL) was added oxalyl chloride (0.51 mL, 5.8 mmol) and DMF (0.15 mL). The reaction mixture was stirred at room temperature for 2 h. The excess solvent and oxalyl chloride were removed under reduced pressure. The resulting acyl chloride was dissolved in CH<sub>2</sub>Cl<sub>2</sub> (30 mL), and SnCl<sub>4</sub> (1.29 mL, 1 M, 1.29 mmol) was added to the solution at -10 °C. The reaction mixture was stirred for 40 min and washed with water and extracted with CH<sub>2</sub>Cl<sub>2</sub> (3 x 30 mL). The combined organic phase was dried over sodium sulfate, evaporated under reduced pressure. The crude product was purified by flash chromatography using a pre-packed 50 g silica column [solvent A: EtOAc; solvent B: hexanes; gradient: 7%A / 93%B (1 CV), 7%A / 93%B → 40%A / 60%B (10 CV), 40%A / 60%B (2 CV); flow rate: 100 mL/min; monitored at 254 and 280 nm] to afford ketone **15** (0.25 g, 1.1 mmol, 92%) as a pale yellow oil. <sup>1</sup>H NMR (600 MHz, CDCl<sub>3</sub>) δ 7.82 (1H, d, *J* = 8.4 Hz), 6.85 (1H, d, *J* = 8.4 Hz), 4.44 (1H, m), 3.88 (3H, s), 2.94 (2H, t, *J* = 6 Hz), 2.57 (2H, t, *J* = 6.6 Hz), 2.05 (2H, m), 1.28 (6H, d, *J* = 6.6 Hz). <sup>13</sup>C NMR (150 MHz, CDCl<sub>3</sub>) δ 197.8, 157.1, 143.3, 139.5, 126.8, 124.1, 110.0, 74.8, 55.8, 38.9, 24.3, 23.1, 22.7.

**8-Isopropoxy-7-methoxy-4-(3,4,5-trimethoxyphenyl)-1,2-dihydronaphthalene (16, NHC\_5\_134).** To an oven-dried flask, THF (30 mL) and 3,4,5-trimethoxyphenyl bromide (0.34 g, 1.4 mmol) were added, and the solution was cooled to -78 °C. *n*-BuLi (0.55 mL, 1.4 mmol)

was slowly added to the reaction mixture, which was then stirred at -78 °C for 30 min. Ketone **15** (0.16 g, 0.68 mmol) was then added dropwise to the flask, and the reaction mixture was stirred while warming from -78 °C to room temperature over 16 h. The reaction mixture was washed with water and extracted with EtOAc (3 x 50 mL). The combined organic phase was dried over sodium sulfate and evaporated under reduced pressure. The crude reaction product was purified by flash chromatography using a pre-packed 50 g silica column [solvent A: EtOAc; solvent B: hexanes; gradient: 7%A / 93%B (1 CV), 7%A / 93%B → 60%A / 40%B (10 CV), 60%A / 80%B (2 CV); flow rate: 100 mL/min; monitored at 254 and 280 nm] to afford dihydronaphthalene **16** (0.17 g, 0.44 mmol, 65%) as a yellow oil. <sup>1</sup>H NMR (600 MHz, CDCl<sub>3</sub>) δ 6.76 (1H, d, *J* = 8.4 Hz), 6.64 (1H, d, *J* = 8.4 Hz), 6.57 (2H, s), 5.96 (1H, t, *J* = 4.8 Hz), 4.41 (1H, m), 3.89 (3H, s), 3.86 (3H, s), 3.84 (6H, s), 2.89 (2H, t, *J* = 7.8 Hz), 2.32 (2H, m), 1.32 (6H, d, *J* = 6 Hz). <sup>13</sup>C NMR (150 MHz, CDCl<sub>3</sub>) δ 153.0, 143.7, 139.8, 137.0, 131.6, 128.9, 125.3, 123.7, 121.3, 109.0, 106.0, 105.3, 75.0, 61.0, 56.2, 55.7, 23.2, 22.8, 22.0.

**2-Methoxy-5-(3,4,5-trimethoxyphenyl)-7,8-dihydronaphthalen-1-ol (3, NHC\_5\_135, Oxi6196).**<sup>4</sup> To a solution of **16** (0.16 g, 0.41 mmol) in CH<sub>2</sub>Cl<sub>2</sub> (20 mL) was added BCl<sub>3</sub> (0.46 mL, 1 M, 0.46 mmol). The reaction mixture was stirred at 0 °C for 3 h. The solution was washed with water and extracted with CH<sub>2</sub>Cl<sub>2</sub> (3 x 30 mL). The combined organic phase was dried over sodium sulfate, evaporated under reduced pressure. The crude product was purified by flash chromatography using a pre-packed 50 g silica column [solvent A: EtOAc; solvent B: hexanes; gradient: 7%A / 93%B (1 CV), 7%A / 93%B → 60%A / 40%B (10 CV), 60%A / 80%B (2 CV); flow rate: 100 mL/min; monitored at 254 and 280 nm] to afford phenol **3** (0.12 g, 0.35 mmol, 85%) as a white solid. <sup>1</sup>H NMR (600 MHz, CDCl<sub>3</sub>) δ 6.62 (1H, d, *J* = 8.4 Hz), 6.60 (1H, d, *J* = 8.4 Hz), 6.56 (2H, s), 5.97 (1H, t, *J* = 4.8 Hz), 3.88(8) (3H, s), 3.88(5) (3H, s), 3.84 (6H, s), 2.88

(2H, t,  $J = 7.8$  Hz), 2.38 (2H, m).  $^{13}\text{C}$  NMR (150 MHz,  $\text{CDCl}_3$ )  $\delta$  153.0, 146.0, 142.1, 139.7, 137.2, 137.0, 129.1, 125.5, 122.4, 107.4, 106.1, 61.1, 56.3, 23.0, 20.4. HRMS: Obsvd 365.1363  $[\text{M} + \text{Na}^+]$ , Calcd for  $\text{C}_{20}\text{H}_{22}\text{O}_5\text{Na}$ : 365.1359, HPLC: 19.41 min.

### **2-Methoxy-5-(3,4,5-trimethoxyphenyl)-7,8-dihydronaphthalen-1-yl**

**trifluoromethanesulfonate (17, NHC\_5\_144).** To a solution of phenol **3** (46 mg, 0.13 mmol) in  $\text{CH}_2\text{Cl}_2$  (20 mL) was added TEA (0.037 mL, 0.26 mmol) and triflic anhydride (0.034 mL, 0.20 mmol) at 0 °C. The reaction mixture was stirred for 5 h while warming from 0 °C to room temperature. The solution was washed with water and extracted with  $\text{CH}_2\text{Cl}_2$  (3 x 30 mL). The organic phase was dried over sodium sulfate and evaporated under reduced pressure. The crude product was purified by flash chromatography using a pre-packed 50 g silica column [solvent A: EtOAc; solvent B: hexanes; gradient: 7%A / 93%B (1 CV), 7%A / 93%B  $\rightarrow$  60%A / 40%B (10 CV), 60%A / 80%B (2 CV); flow rate: 100 mL/min; monitored at 254 and 280 nm] to afford triflic compound **17** (64 mg, 0.20 mmol, 100%) as a brown solid.  $^1\text{H}$  NMR (600 MHz,  $\text{CDCl}_3$ )  $\delta$  7.01 (1H, d,  $J = 9$  Hz), 6.75 (1H, d,  $J = 9$  Hz), 6.53 (2H, s), 6.03 (1H, t,  $J = 4.2$  Hz), 3.89 (3H, s), 3.88 (3H, s), 3.85 (6H, s), 2.91 (2H, t,  $J = 7.8$  Hz), 2.39 (2H, m).  $^{13}\text{C}$  NMR (150 MHz,  $\text{CDCl}_3$ )  $\delta$  152.3, 150.3, 139.0, 137.5, 136.5, 136.0, 131.2, 129.5, 125.9, 125.8, 109.7, 105.9, 61.1, 56.3, 56.2, 22.5, 22.1.  $^{19}\text{F}$  NMR (564 MHz,  $\text{CDCl}_3$ )  $\delta$  -73.35.

**2-Methoxy-5-(3,4,5-trimethoxyphenyl)-7,8-dihydronaphthalen-1-amine (4, DM40511, KGP05).**<sup>4</sup> To toluene (20 mL) in a pressure vial was added triflate **17** (0.96 g, 2.0 mmol),  $\text{Pd}(\text{OAc})_2$  (45 mg, 0.20 mmol), *rac*-BINAP (0.19 g, 0.30 mmol), benzophenone imine (0.51 mL) and  $\text{Cs}_2\text{CO}_3$  (989 mg, 3.04 mmol). The solution was degassed (bubbling nitrogen) for 15 min. After heating at 110 °C for 36 h, the reaction mixture was cooled to room temperature and diluted with EtOAc and quenched with water. The organic layer was separated and dried over

anhydrous sodium sulfate. The solvent was removed under reduced pressure and the crude product was dissolved in THF (20 mL) and treated with 2 M HCl until pH 2-3 was achieved, followed by stirring for 1 h. A 1 M NaOH solution was added to the reaction to achieve basic pH. The solution was extracted with EtOAc (3 x 30 mL) and the combined organic layers were dried over sodium sulfate and evaporated under reduced pressure. The crude product was purified by flash chromatography using a pre-packed 100 g silica column [solvent A: EtOAc; solvent B: hexanes; gradient: 7%A / 93%B (1 CV), 7%A / 93%B → 60%A / 40%B (10 CV), 60%A / 80%B (2 CV); flow rate: 100 mL/min; monitored at 254 and 280 nm] to afford amine **4** (500 mg, 1.46 mmol, 72%) as a white crystal solid. <sup>1</sup>H NMR (600 MHz, CDCl<sub>3</sub>) δ 6.60 (1H, d, *J* = 8.5 Hz), 6.56 (2H, s), 6.51 (1H, d, *J* = 8.5 Hz), 5.92 (1H, t, *J* = 4.5 Hz), 3.89 (3H, s), 3.86 (3H, s), 3.84 (6H, s), 2.67 (2H, t, *J* = 8 Hz), 2.42 (2H, m). <sup>13</sup>C NMR (150 MHz, CDCl<sub>3</sub>) δ 152.8, 147.1, 140.0, 137.2, 137.0, 132.7, 128.2, 124.0, 121.1, 116.6, 107.1, 106.1, 60.9, 56.1, 55.6, 23.0, 21.6. HRMS: Obsvd 364.1522 [M + Na<sup>+</sup>], Calcd for C<sub>22</sub>H<sub>23</sub>NO<sub>4</sub>Na: 364.1519, HPLC: 19.07 min.

# 2-isopropoxy-3-methoxybenzaldehyde

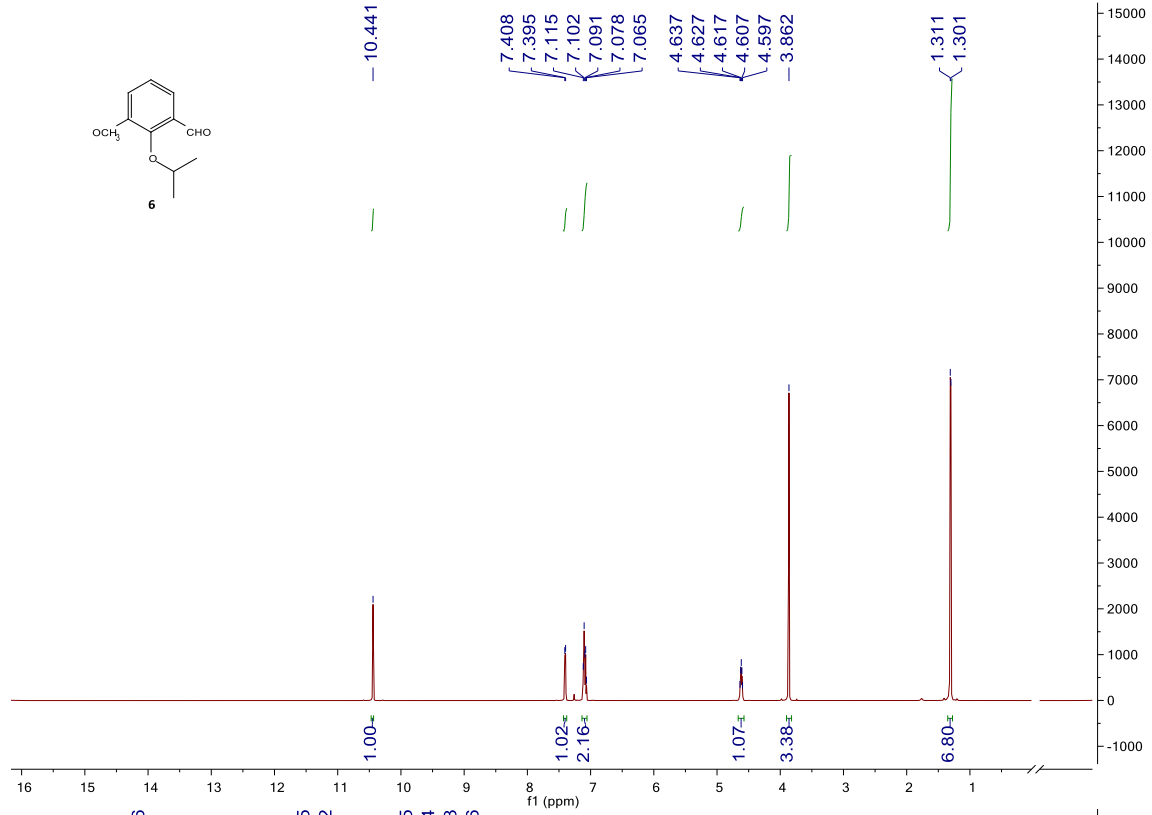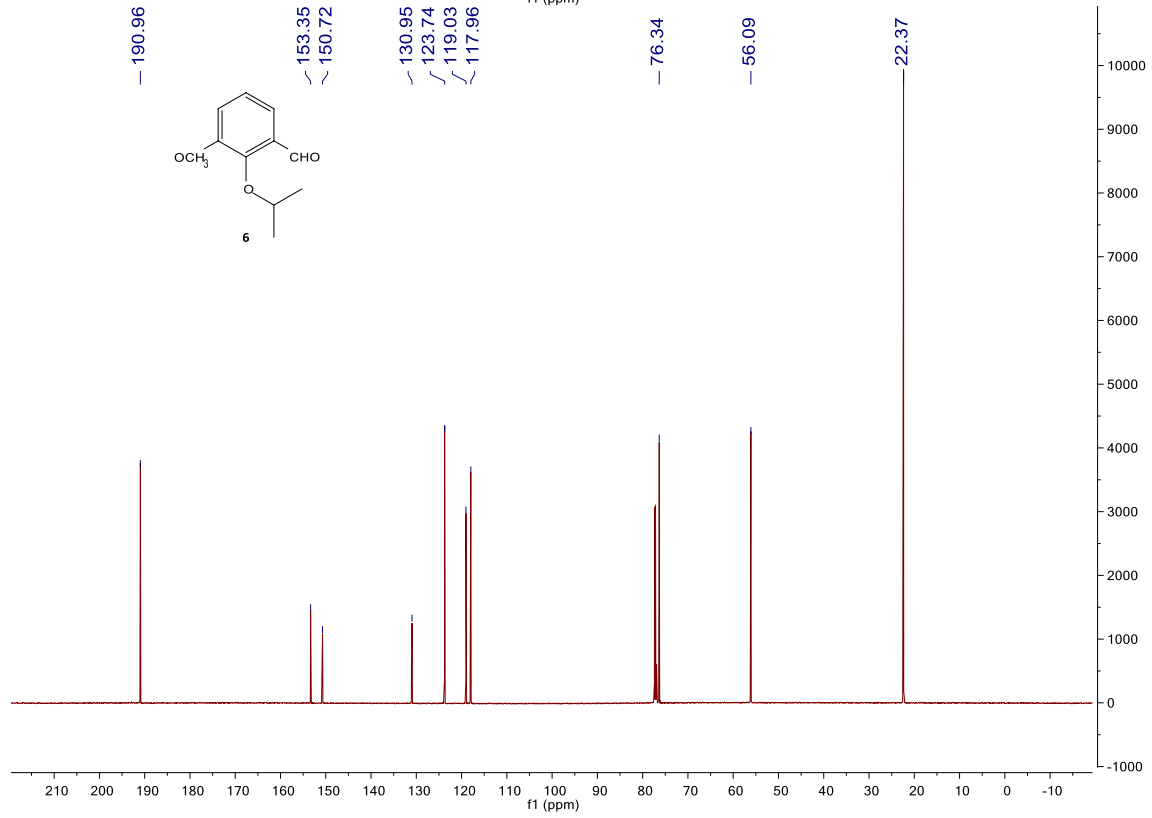

# 5-(2-isopropoxy-3-methoxyphenyl)pentanoic acid

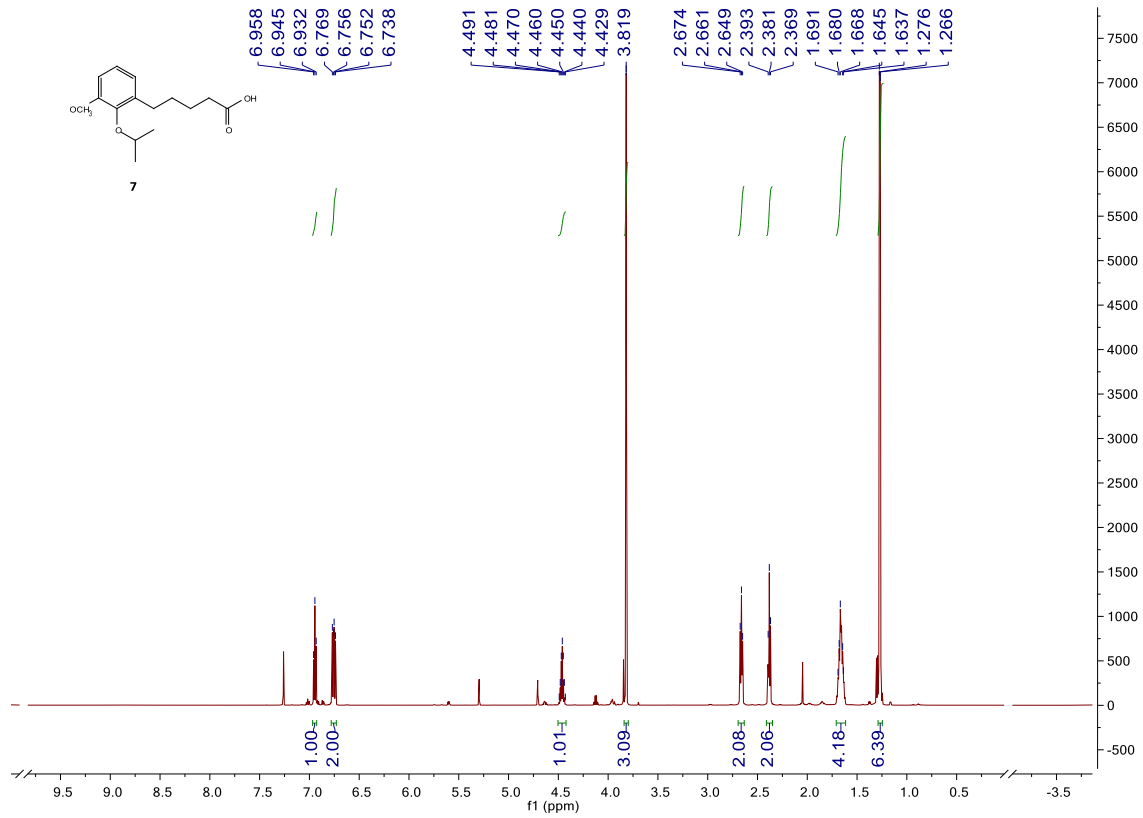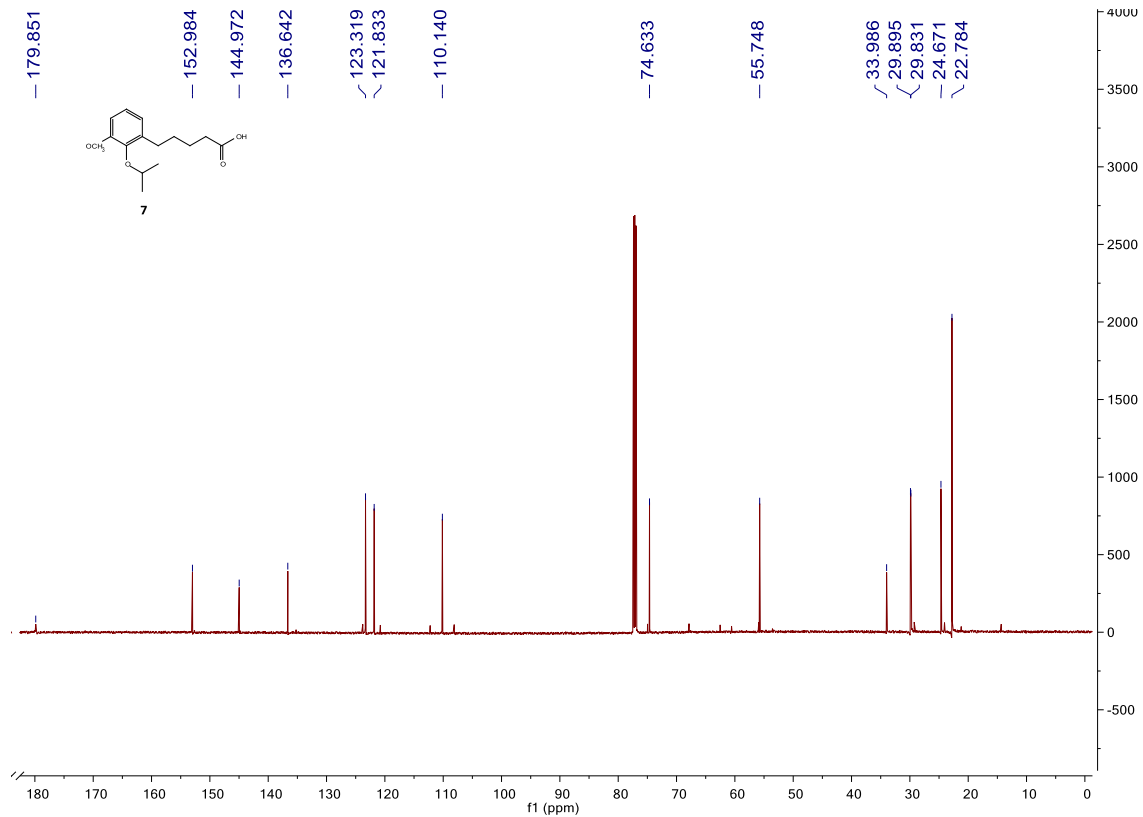

# 1-isopropoxy-2-methoxy-6,7,8,9-tetrahydro-5H-benzo[7]annulen-5-one

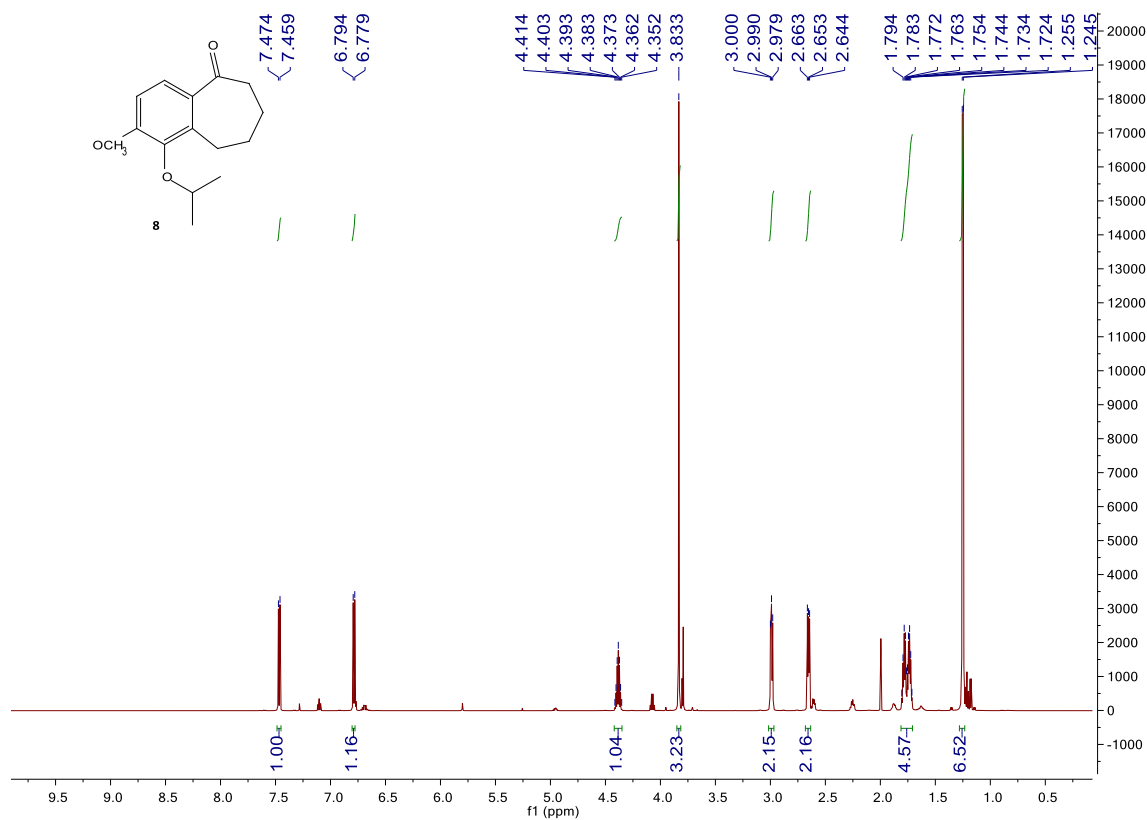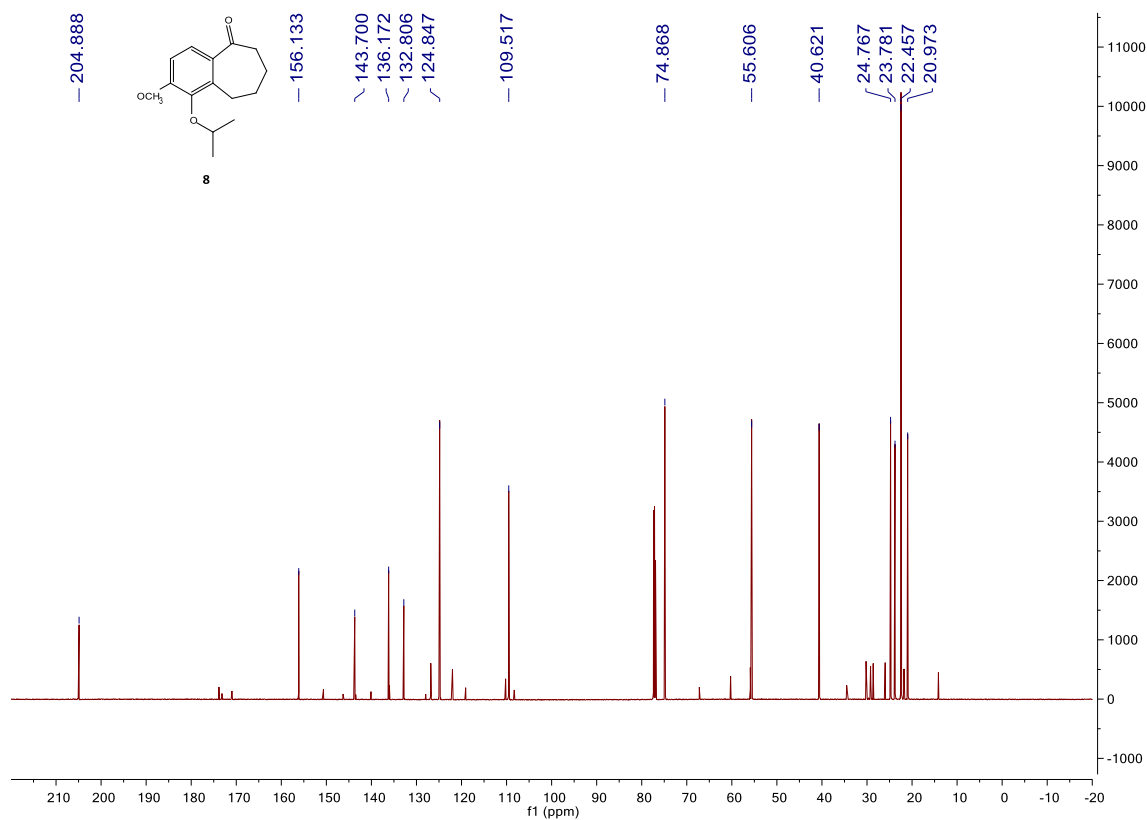



# 4-isopropoxy-3-methoxy-9-(3,4,5-trimethoxyphenyl)-6,7-dihydro-5H-benzo[7]annulene

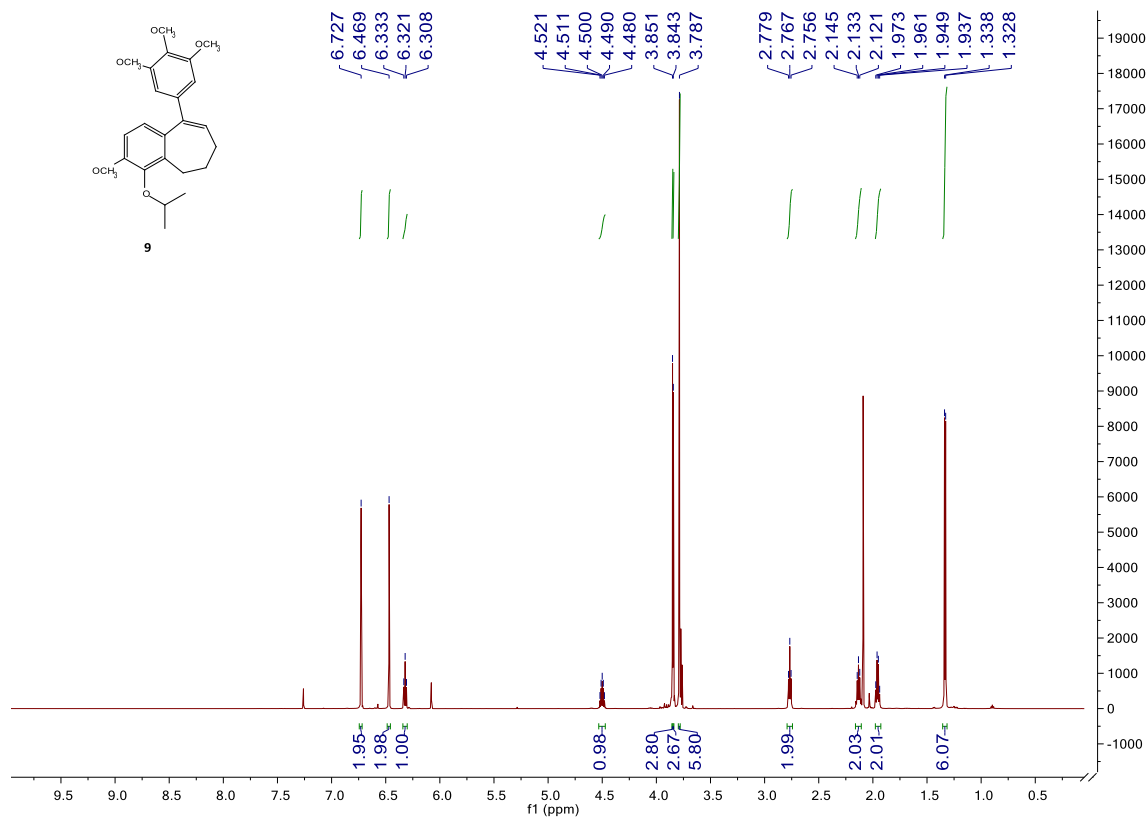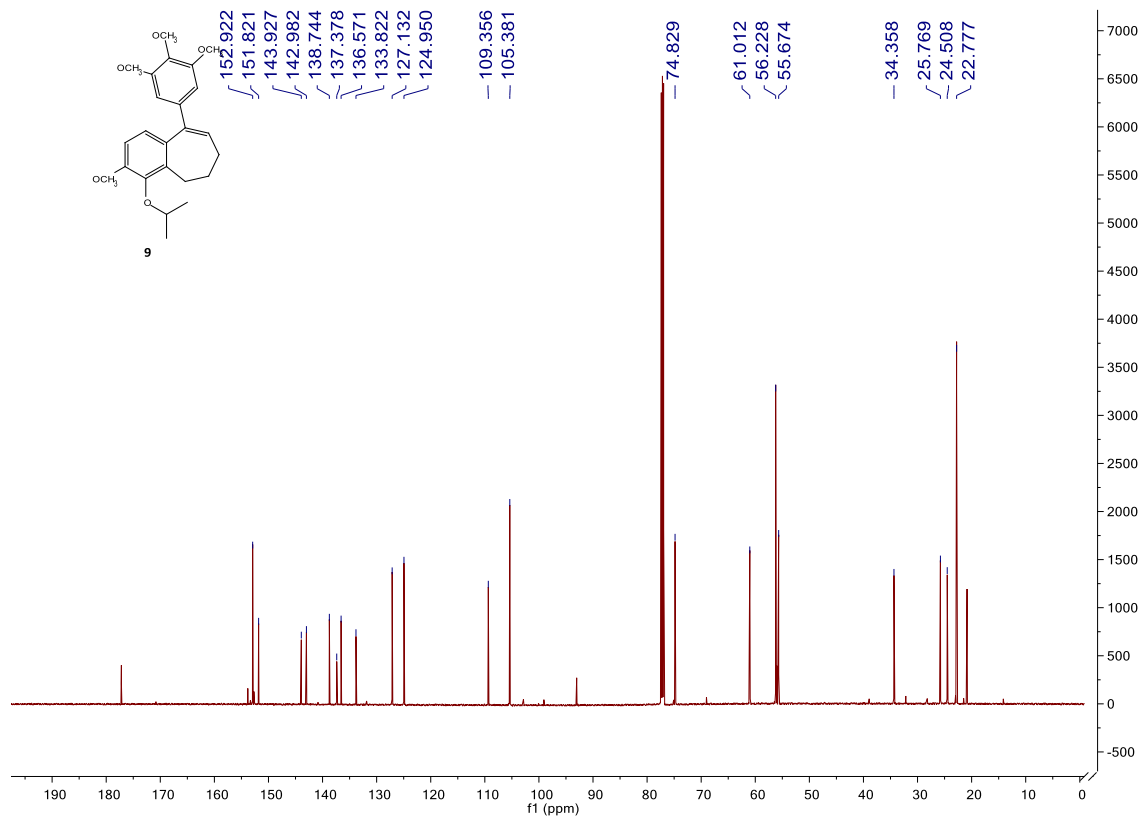

**3-methoxy-9-(3,4,5-trimethoxyphenyl)-6,7-dihydro-5H-benzo[7]annulen-4-ol**

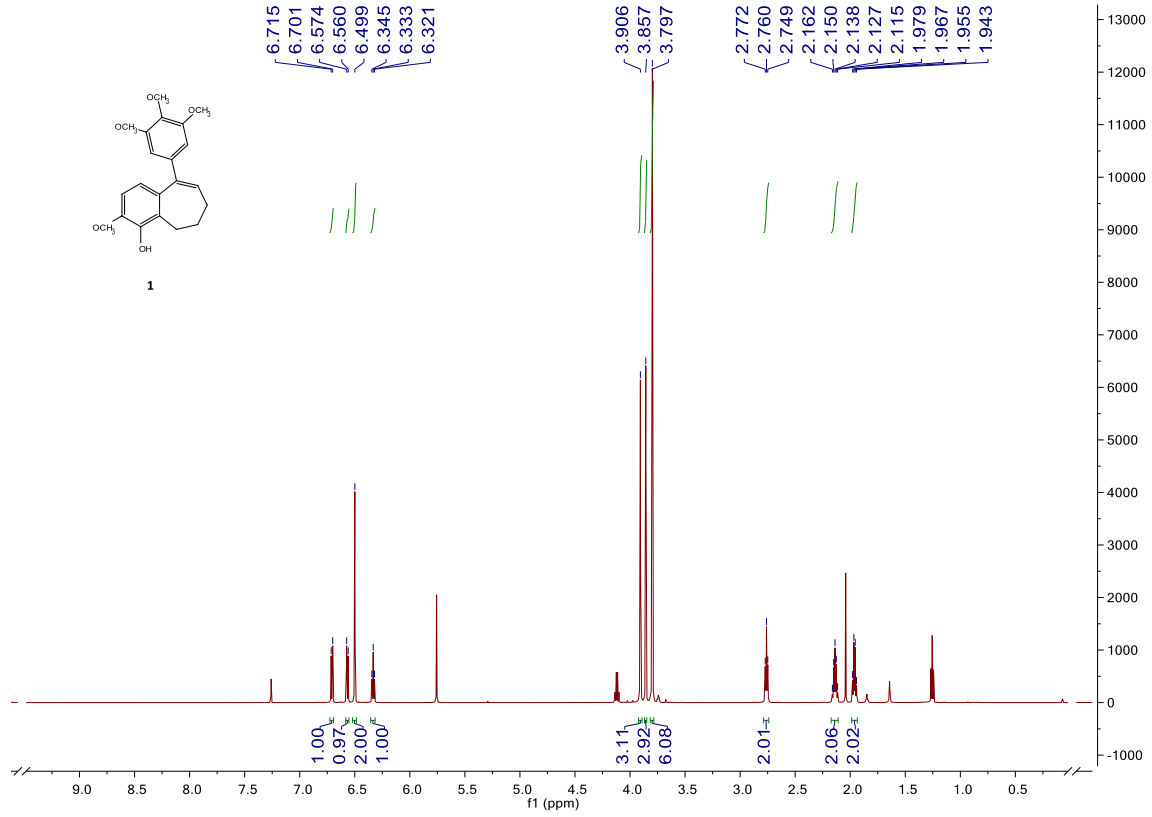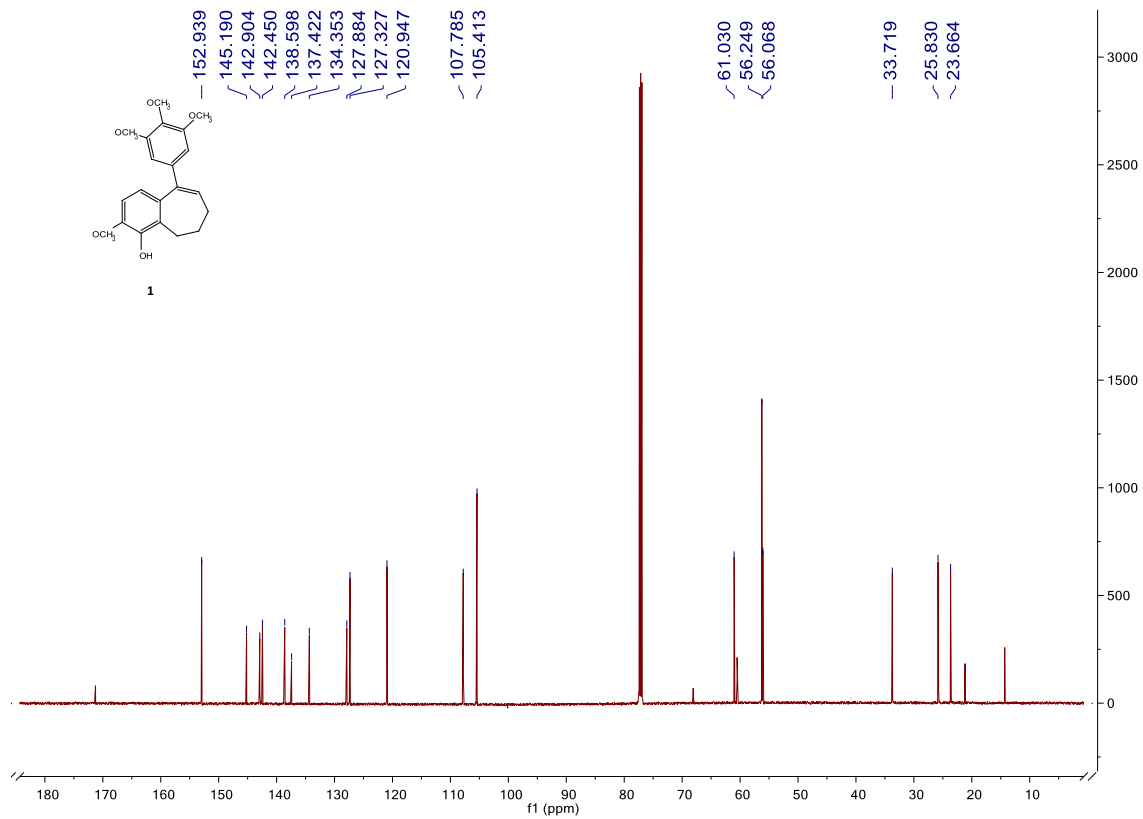

KGP18\_+ESI #2-20 RT: 0.01-0.15 AV: 19 NL: 2.49E8  
T: FTMS + p ESI Full ms [200.00-1000.00]

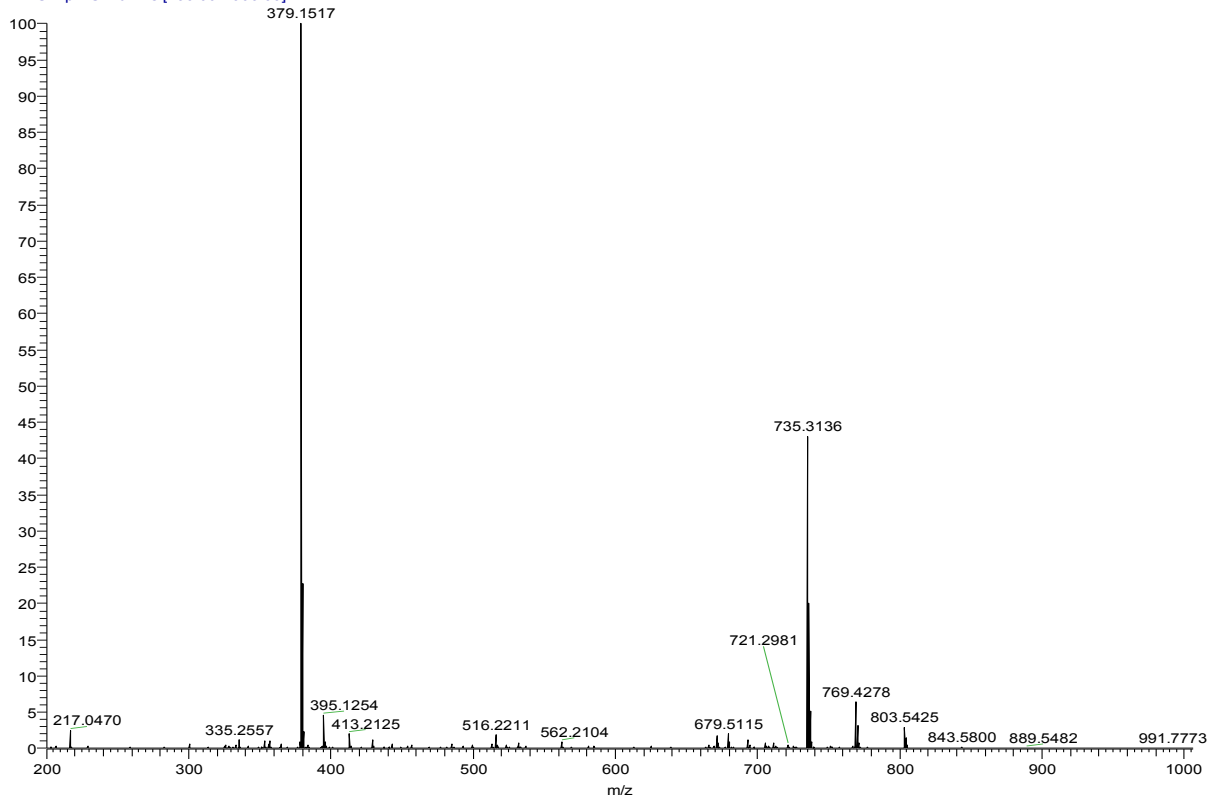

Data File C:\Chem32\1\Data\Debo\2017-02-14DMKGP18\_Feb142017.D  
Sample Name: DMKGP18\_Feb142017

=====  
Acq. Operator : SYSTEM  
Sample Operator : SYSTEM  
Acq. Instrument : 1200 HPLC Location : 1  
Injection Date : 2/14/2017 4:01:18 PM  
Inj Volume : No inj  
Acq. Method : C:\CHEM32\1\METHODS\GRAD 2 50-90 ACN.M  
Last changed : 4/30/2014 1:53:57 AM by ERICAP  
Analysis Method : C:\CHEM32\1\METHODS\RT-ACNWASH 2.M  
Last changed : 7/9/2015 2:27:22 PM by Blake  
Method Info : General Column Wash Method  
  
Sample Info : WASH

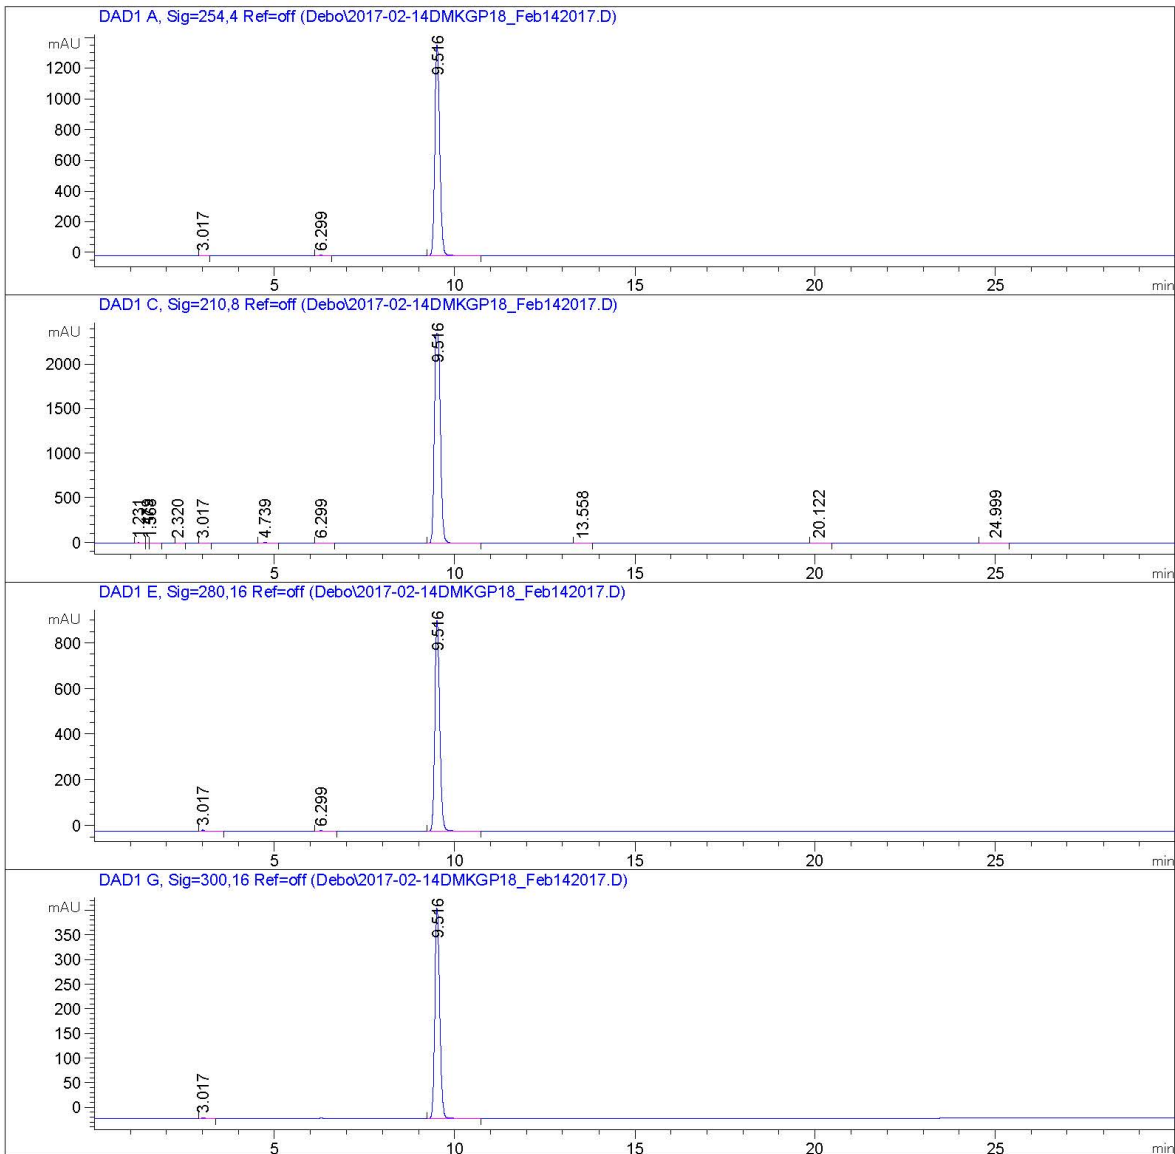

Data File C:\Chem32\1\Data\Debo\2017-02-14DMKGP18\_Feb142017.D  
 Sample Name: DMKGP18\_Feb142017

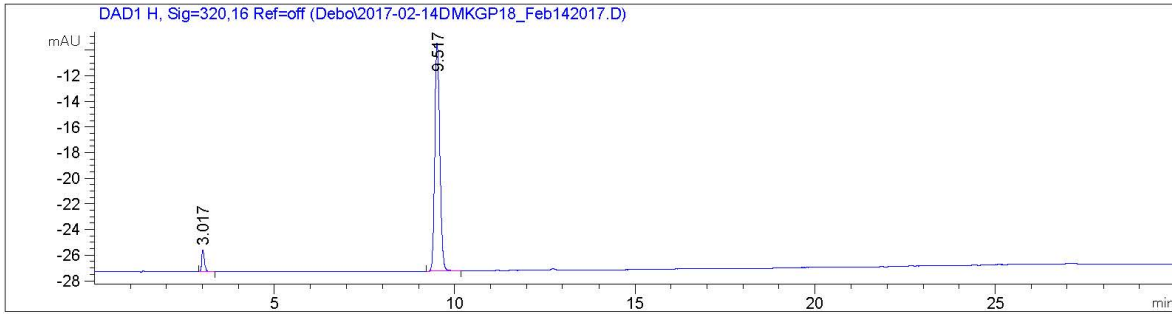

=====  
 Area Percent Report  
 =====

Sorted By : Signal  
 Multiplier : 1.0000  
 Dilution : 1.0000  
 Use Multiplier & Dilution Factor with ISTDs

Signal 1: DAD1 A, Sig=254,4 Ref=off

| Peak # | RetTime [min] | Type | Width [min] | Area [mAU*s] | Height [mAU] | Area %  |
|--------|---------------|------|-------------|--------------|--------------|---------|
| 1      | 3.017         | BB   | 0.0809      | 7.92427      | 1.51895      | 0.0613  |
| 2      | 6.299         | BB   | 0.1177      | 18.41172     | 2.39434      | 0.1425  |
| 3      | 9.516         | BB   | 0.1457      | 1.28930e4    | 1370.82507   | 99.7962 |

Totals : 1.29193e4 1374.73836

Signal 2: DAD1 C, Sig=210,8 Ref=off

| Peak # | RetTime [min] | Type | Width [min] | Area [mAU*s] | Height [mAU] | Area %  |
|--------|---------------|------|-------------|--------------|--------------|---------|
| 1      | 1.231         | BV   | 0.1239      | 67.62749     | 7.31446      | 0.2446  |
| 2      | 1.479         | VV   | 0.0687      | 24.06869     | 5.13172      | 0.0870  |
| 3      | 1.568         | VB   | 0.0880      | 21.89349     | 3.45356      | 0.0792  |
| 4      | 2.320         | BB   | 0.0914      | 23.63717     | 3.75622      | 0.0855  |
| 5      | 3.017         | BB   | 0.0815      | 33.52399     | 6.36371      | 0.1212  |
| 6      | 4.739         | BB   | 0.1053      | 77.87326     | 11.18089     | 0.2816  |
| 7      | 6.299         | BB   | 0.1225      | 51.40400     | 6.34442      | 0.1859  |
| 8      | 9.516         | BB   | 0.1848      | 2.72540e4    | 2359.50000   | 98.5700 |
| 9      | 13.558        | BB   | 0.1699      | 11.40957     | 1.04072      | 0.0413  |
| 10     | 20.122        | BB   | 0.1840      | 30.95074     | 2.61644      | 0.1119  |
| 11     | 24.999        | BB   | 0.2012      | 52.99282     | 4.03620      | 0.1917  |

Totals : 2.76494e4 2410.73835

Data File C:\Chem32\1\Data\Debo\2017-02-14DMKGP18\_Feb142017.D  
Sample Name: DMKGP18\_Feb142017

Signal 3: DAD1 E, Sig=280,16 Ref=off

| Peak #   | RetTime [min] | Type | Width [min] | Area [mAU*s] | Height [mAU] | Area %  |
|----------|---------------|------|-------------|--------------|--------------|---------|
| 1        | 3.017         | BB   | 0.0826      | 20.04528     | 3.73385      | 0.2313  |
| 2        | 6.299         | BB   | 0.1186      | 12.28080     | 1.58086      | 0.1417  |
| 3        | 9.516         | BB   | 0.1453      | 8635.64453   | 921.89136    | 99.6271 |
| Totals : |               |      |             | 8667.97061   | 927.20607    |         |

Signal 4: DAD1 G, Sig=300,16 Ref=off

| Peak #   | RetTime [min] | Type | Width [min] | Area [mAU*s] | Height [mAU] | Area %  |
|----------|---------------|------|-------------|--------------|--------------|---------|
| 1        | 3.017         | BB   | 0.0811      | 12.90936     | 2.46527      | 0.3210  |
| 2        | 9.516         | BB   | 0.1454      | 4008.43823   | 427.41019    | 99.6790 |
| Totals : |               |      |             | 4021.34760   | 429.87545    |         |

Signal 5: DAD1 H, Sig=320,16 Ref=off

| Peak #   | RetTime [min] | Type | Width [min] | Area [mAU*s] | Height [mAU] | Area %  |
|----------|---------------|------|-------------|--------------|--------------|---------|
| 1        | 3.017         | BB   | 0.0812      | 8.83565      | 1.68324      | 4.8729  |
| 2        | 9.517         | BB   | 0.1512      | 172.48602    | 17.77163     | 95.1271 |
| Totals : |               |      |             | 181.32167    | 19.45487     |         |

=====  
\*\*\* End of Report \*\*\*

**3-methoxy-9-(3,4,5-trimethoxyphenyl)-6,7-dihydro-5H-benzo[7]annulen-4-yl trifluoromethanesulfonate**

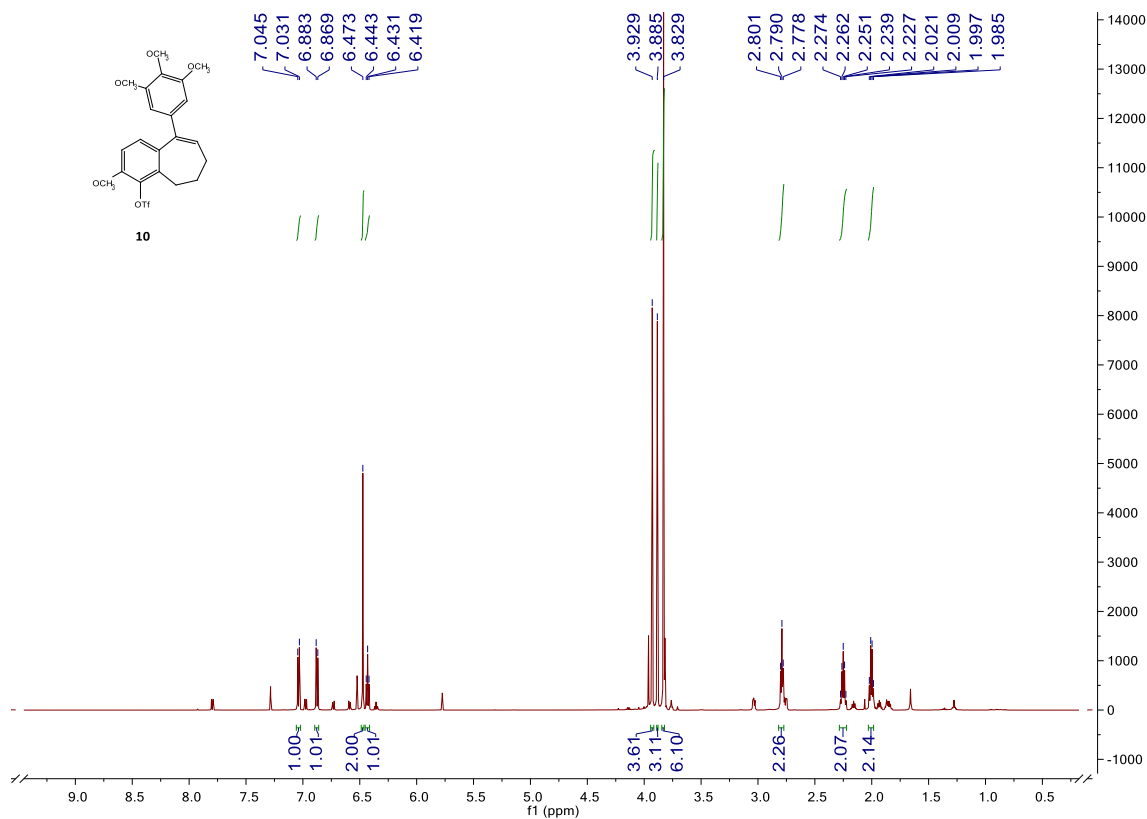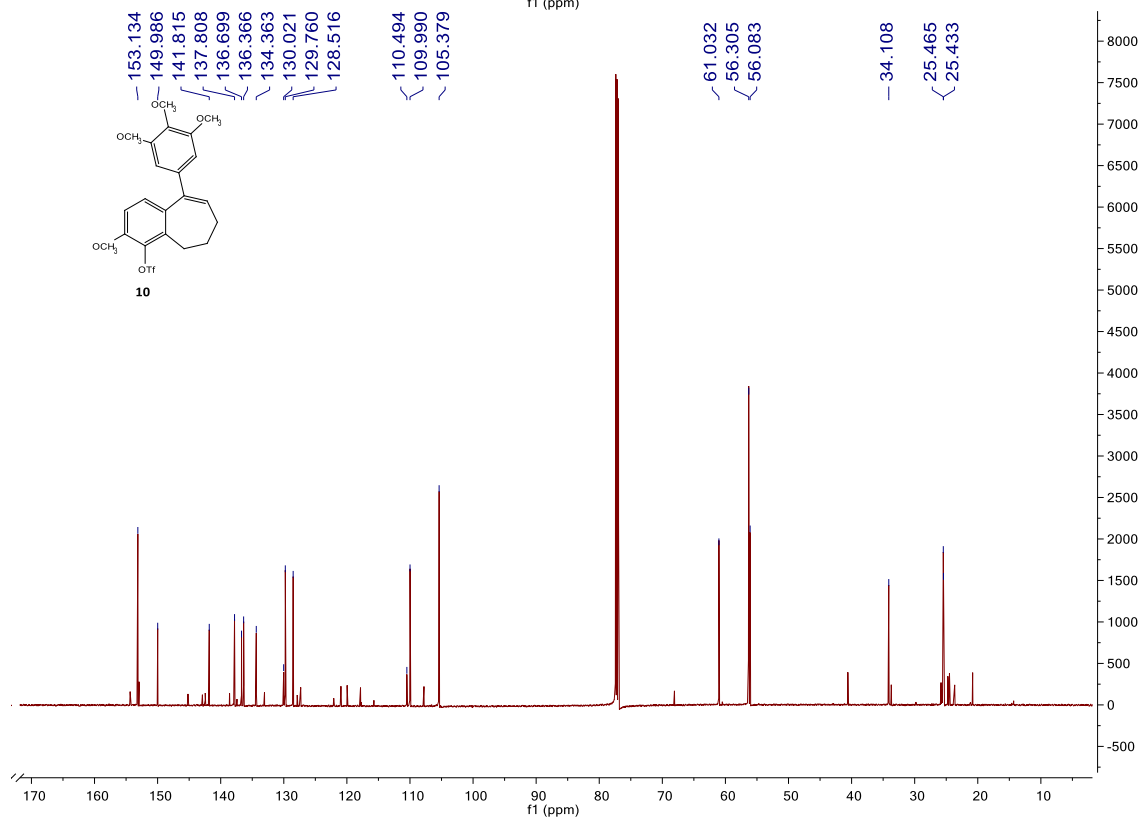

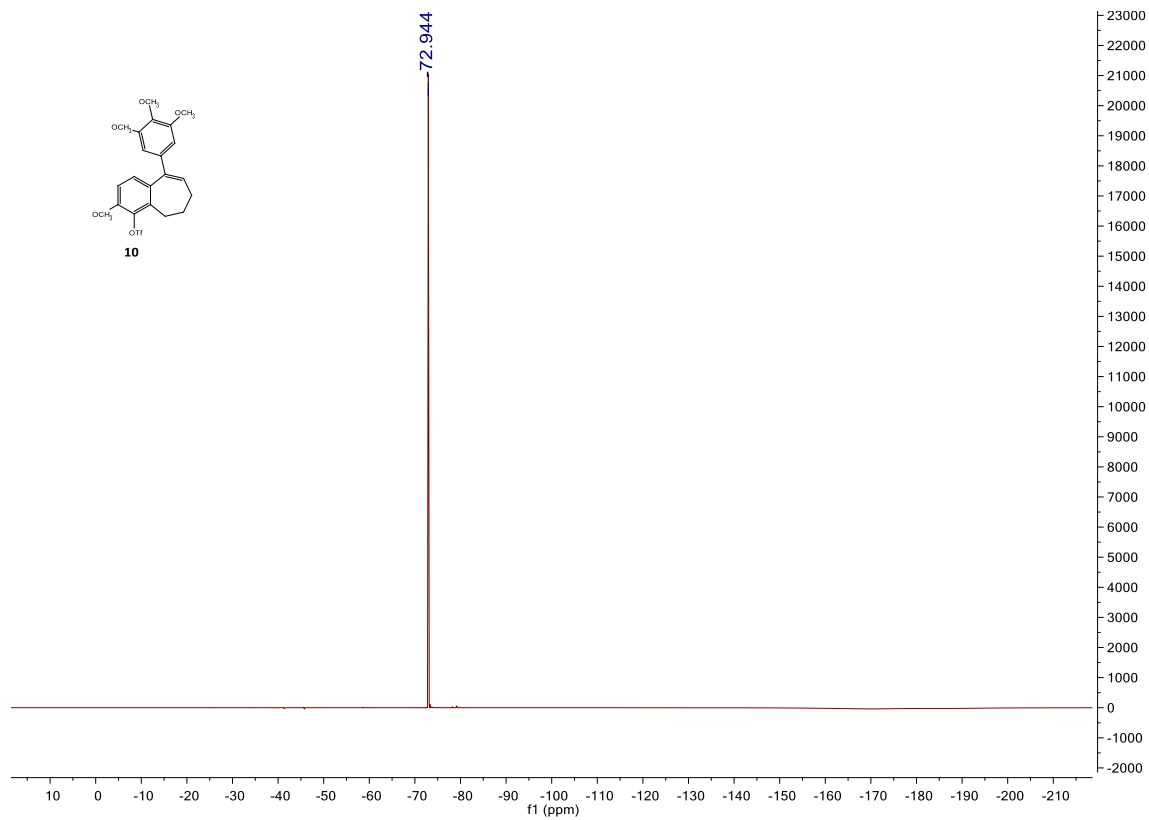



**3-methoxy-9-(3,4,5-trimethoxyphenyl)-6,7-dihydro-5H-benzo[7]annulen-4-amine**

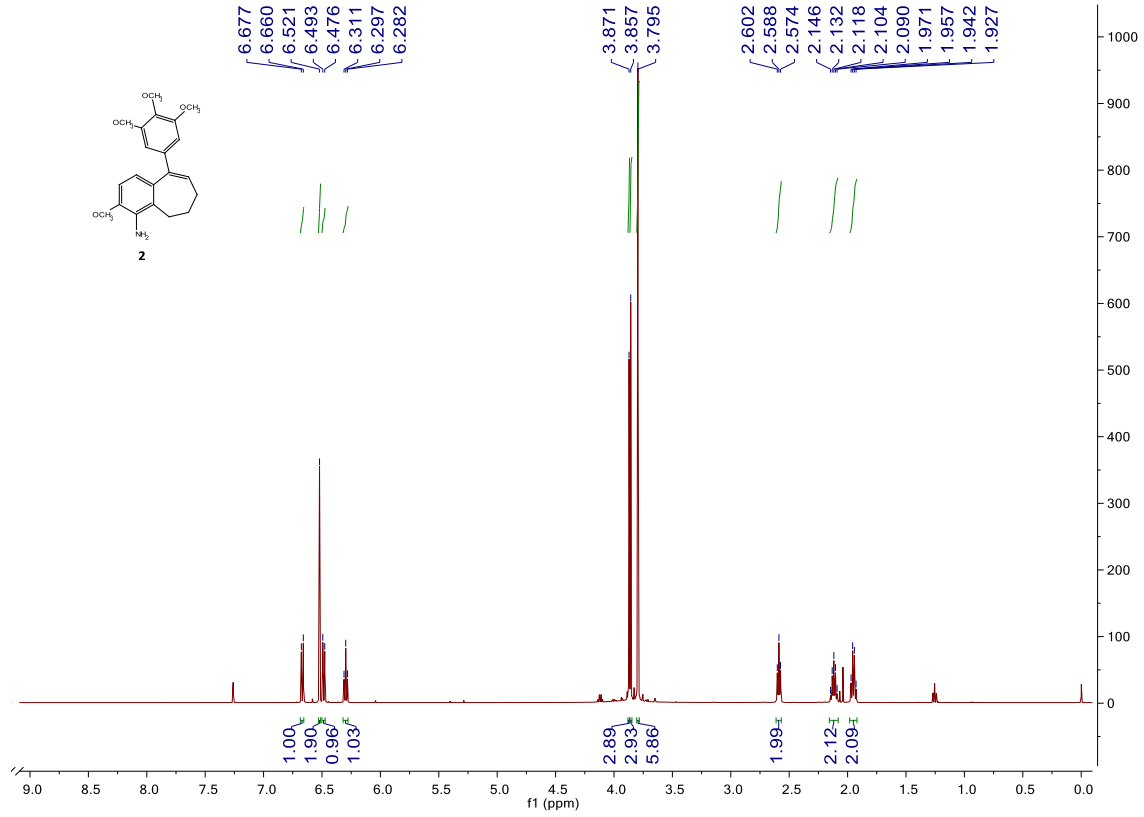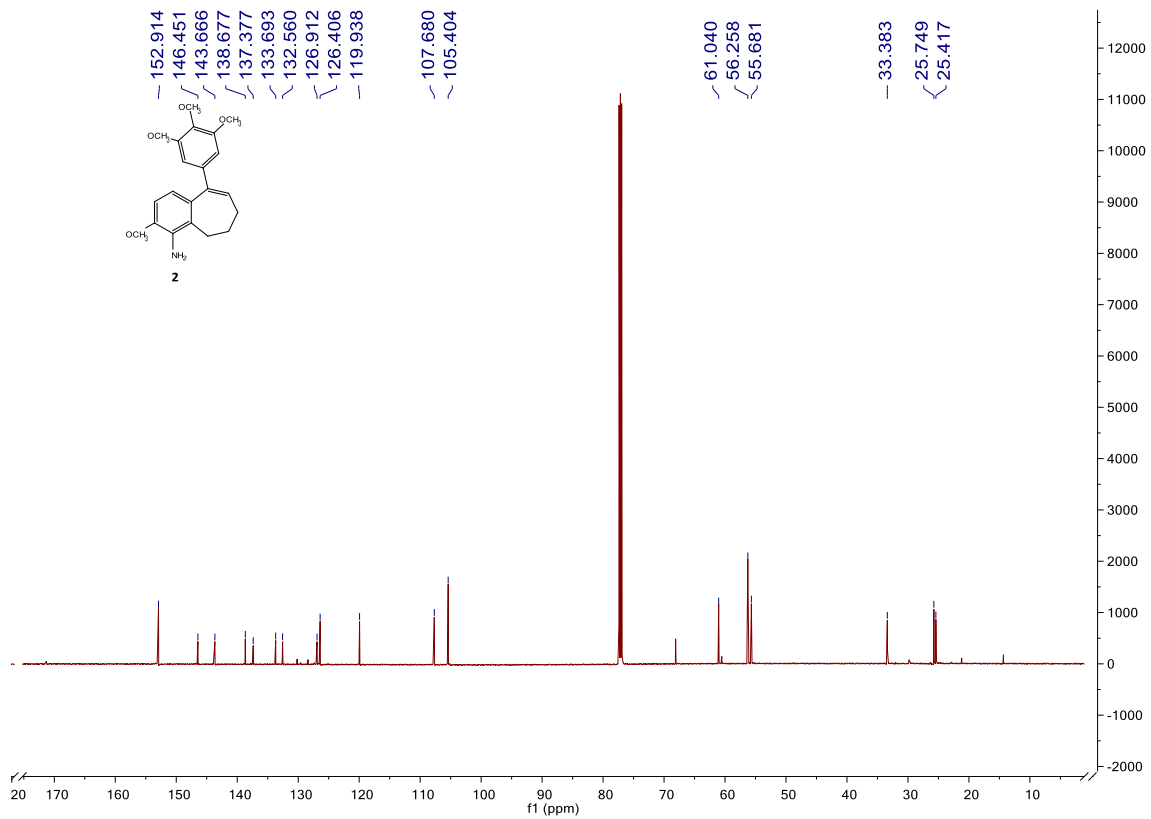

KGP156\_Pure\_+ESI#2-20 RT: 0.01-0.15 AV: 19 NL: 1.81E8  
T: FTMS + p ESI Full ms [200.00-1000.00]

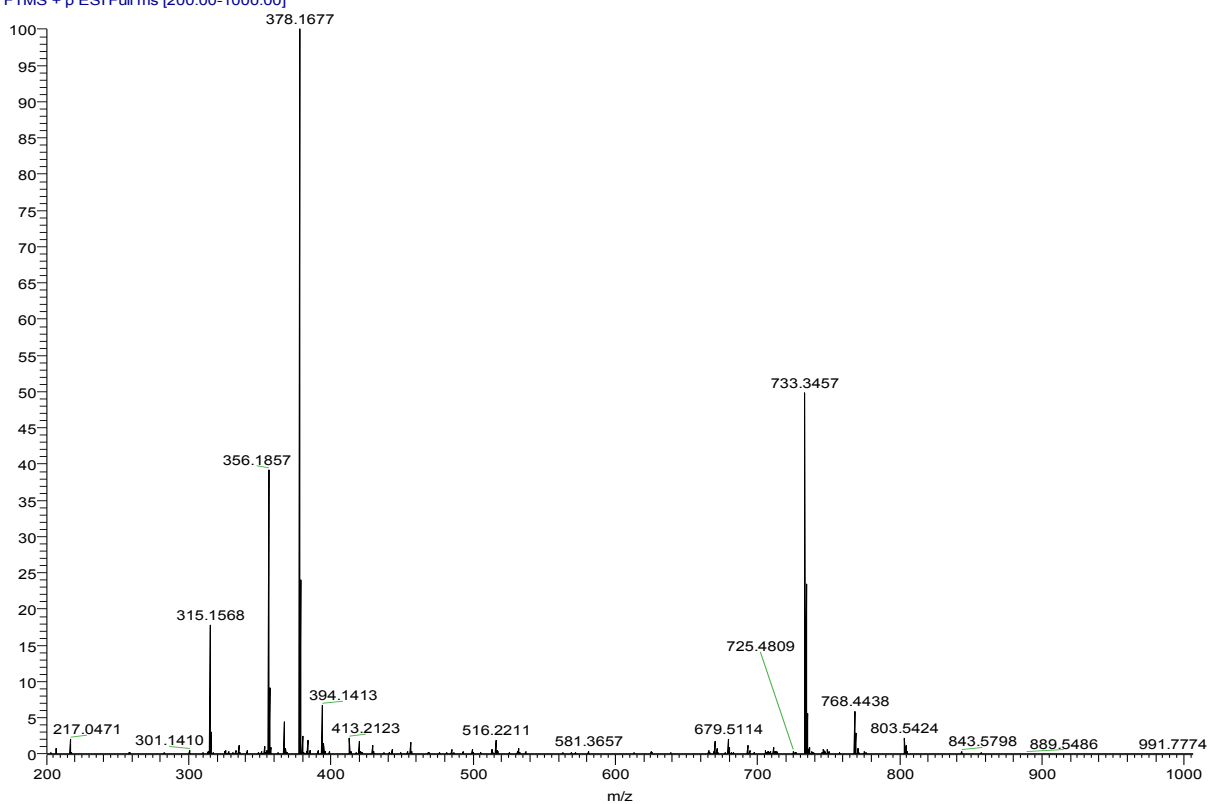

=====  
Acq. Operator : SYSTEM  
Sample Operator : SYSTEM  
Acq. Instrument : 1200 HPLC Location : 1  
Injection Date : 2/23/2018 3:21:29 PM  
Inj Volume : No inj  
Method : C:\CHEM32\1\METHODS\MASTERMETHOD2.M  
Last changed : 12/2/2015 12:37:42 PM by Eric Lin

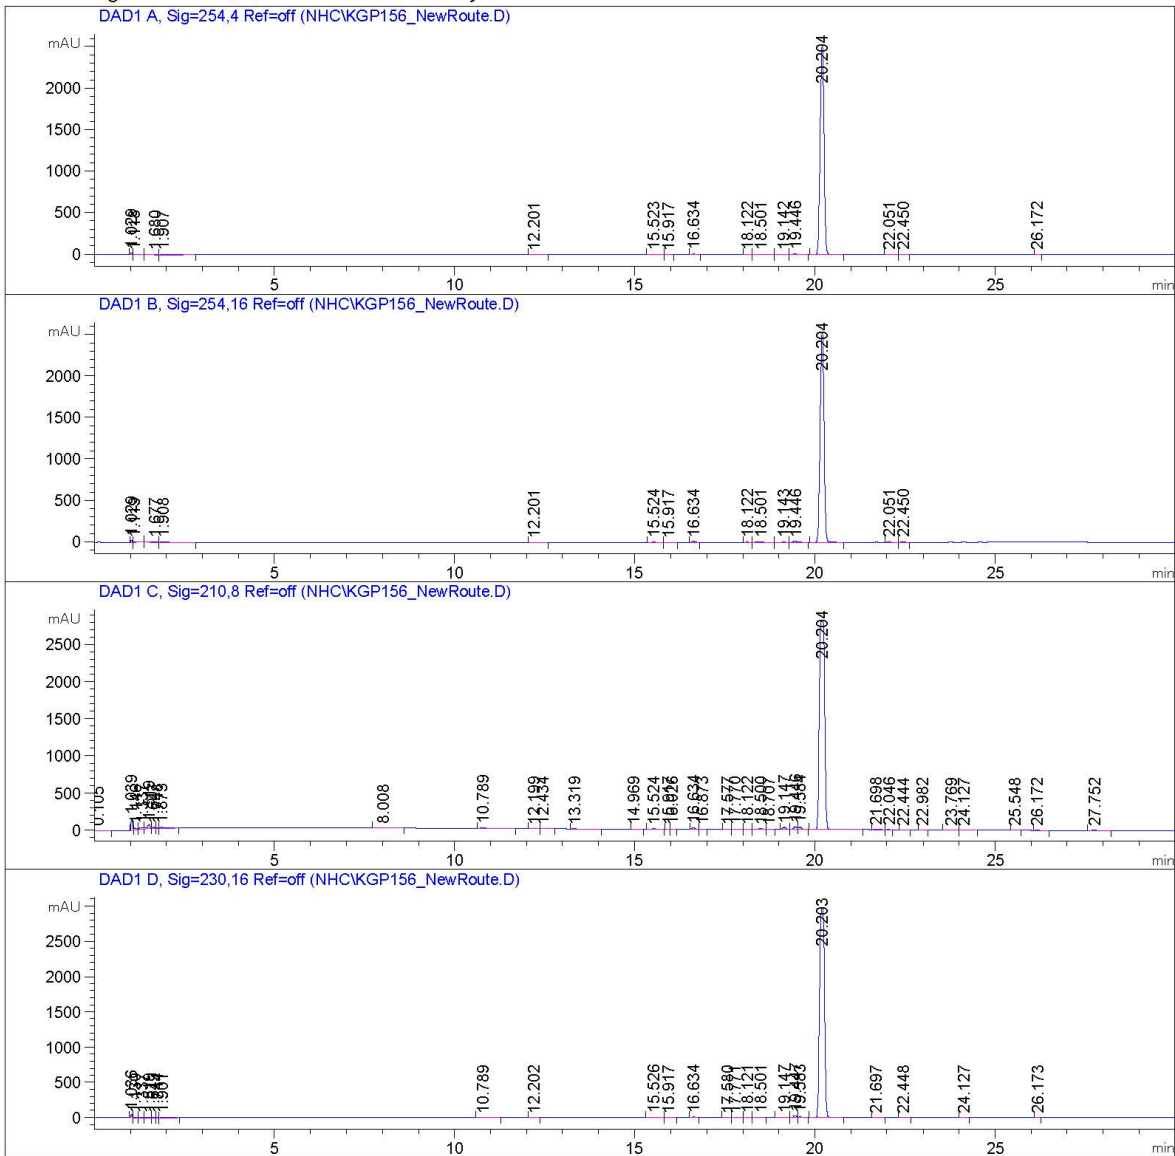

Data File C:\Chem32\1\Data\NHC\KGP156\_NewRoute.D  
Sample Name: KGP156\_NewRoute

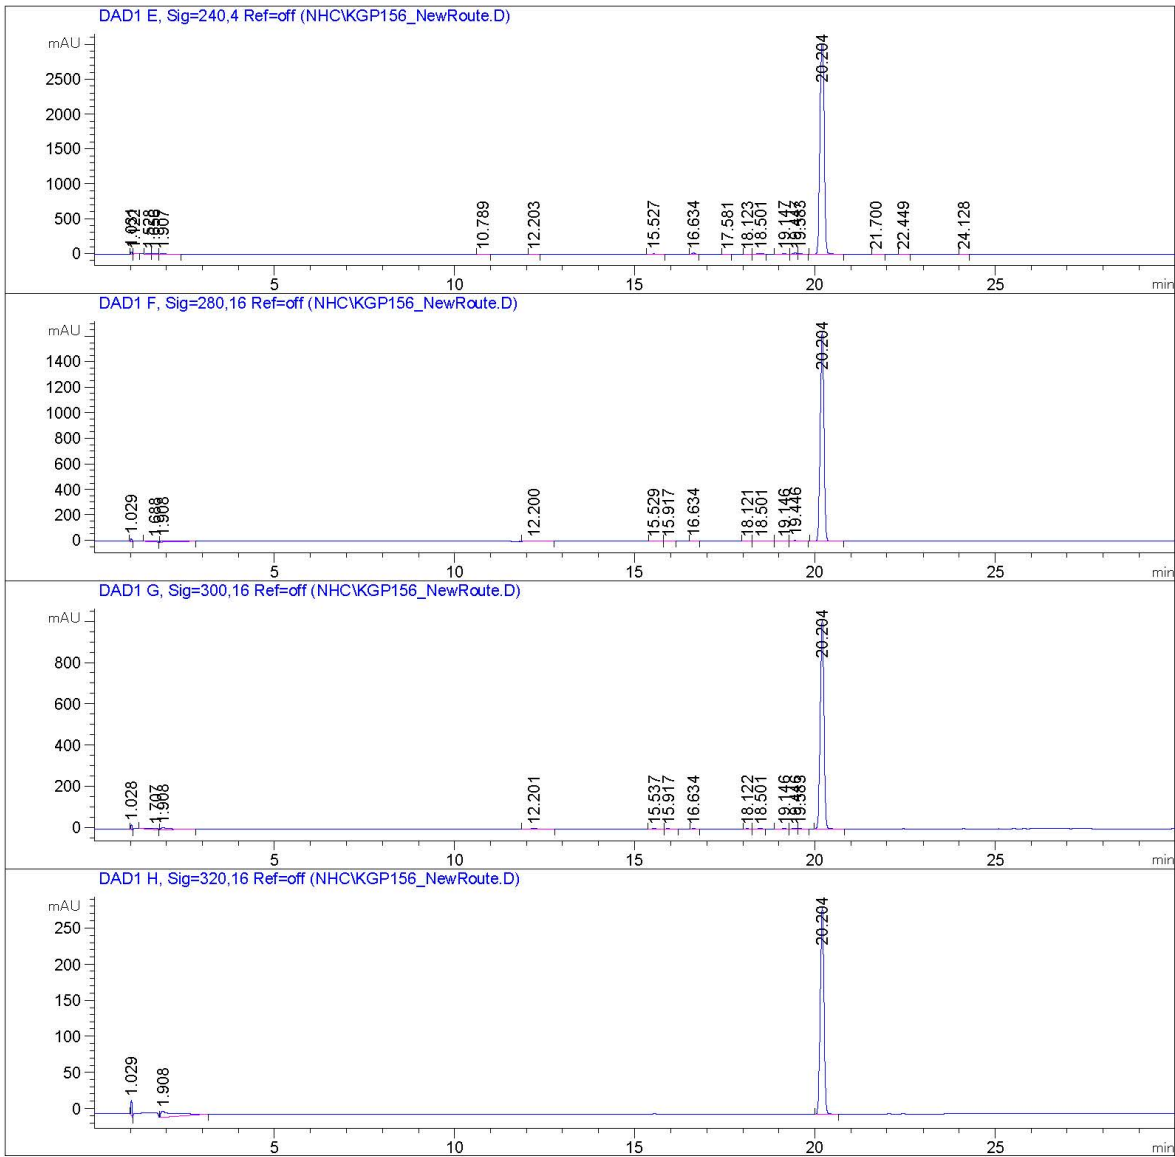

=====  
Area Percent Report  
=====

Sorted By : Signal  
Multiplier : 1.0000  
Dilution : 1.0000  
Use Multiplier & Dilution Factor with ISTDs

Data File C:\Chem32\1\Data\NHC\KGP156\_NewRoute.D  
Sample Name: KGP156\_NewRoute

Signal 1: DAD1 A, Sig=254,4 Ref=off

| Peak # | RetTime [min] | Type | Width [min] | Area [mAU*s] | Height [mAU] | Area %  |
|--------|---------------|------|-------------|--------------|--------------|---------|
| 1      | 1.029         | BB   | 0.0373      | 55.82447     | 23.88107     | 0.2894  |
| 2      | 1.118         | BB   | 0.1385      | 42.81089     | 4.36124      | 0.2219  |
| 3      | 1.680         | BB   | 0.2278      | 138.07449    | 8.95691      | 0.7158  |
| 4      | 1.907         | BB   | 0.3133      | 325.06317    | 13.97761     | 1.6851  |
| 5      | 12.201        | BB   | 0.1674      | 14.90917     | 1.40945      | 0.0773  |
| 6      | 15.523        | BV   | 0.1072      | 20.49548     | 2.87480      | 0.1062  |
| 7      | 15.917        | VB   | 0.0940      | 6.14189      | 1.02298      | 0.0318  |
| 8      | 16.634        | BB   | 0.0874      | 58.33884     | 10.41444     | 0.3024  |
| 9      | 18.122        | BB   | 0.0885      | 12.03194     | 2.11179      | 0.0624  |
| 10     | 18.501        | BB   | 0.1652      | 61.16386     | 5.88928      | 0.3171  |
| 11     | 19.142        | BB   | 0.1032      | 10.32391     | 1.55925      | 0.0535  |
| 12     | 19.446        | BB   | 0.1064      | 91.89568     | 13.01069     | 0.4764  |
| 13     | 20.204        | BB   | 0.1149      | 1.84236e4    | 2530.97681   | 95.5080 |
| 14     | 22.051        | VV   | 0.1250      | 10.32810     | 1.19292      | 0.0535  |
| 15     | 22.450        | VB   | 0.1052      | 13.72154     | 2.02115      | 0.0711  |
| 16     | 26.172        | BB   | 0.0798      | 5.39494      | 1.05173      | 0.0280  |

Totals : 1.92901e4 2624.71211

Signal 2: DAD1 B, Sig=254,16 Ref=off

| Peak # | RetTime [min] | Type | Width [min] | Area [mAU*s] | Height [mAU] | Area %  |
|--------|---------------|------|-------------|--------------|--------------|---------|
| 1      | 1.029         | BB   | 0.0366      | 54.91505     | 24.11636     | 0.2837  |
| 2      | 1.119         | BB   | 0.1389      | 41.82282     | 4.24751      | 0.2161  |
| 3      | 1.677         | BB   | 0.2294      | 136.65419    | 8.79058      | 0.7061  |
| 4      | 1.908         | BB   | 0.3125      | 320.27887    | 13.81122     | 1.6549  |
| 5      | 12.201        | BB   | 0.1691      | 15.84175     | 1.47786      | 0.0819  |
| 6      | 15.524        | BV   | 0.1078      | 20.49586     | 2.85384      | 0.1059  |
| 7      | 15.917        | VB   | 0.0940      | 6.49141      | 1.05227      | 0.0335  |
| 8      | 16.634        | BB   | 0.0872      | 55.58357     | 9.94209      | 0.2872  |
| 9      | 18.122        | BV   | 0.0888      | 12.16264     | 2.12407      | 0.0628  |
| 10     | 18.501        | VB   | 0.1679      | 60.18542     | 5.75875      | 0.3110  |
| 11     | 19.143        | BV   | 0.1057      | 13.06765     | 1.86512      | 0.0675  |
| 12     | 19.446        | VB   | 0.1100      | 93.51012     | 12.68323     | 0.4832  |
| 13     | 20.204        | BB   | 0.1151      | 1.84998e4    | 2535.37988   | 95.5880 |
| 14     | 22.051        | VV   | 0.1257      | 9.69743      | 1.11286      | 0.0501  |
| 15     | 22.450        | VB   | 0.1071      | 13.17622     | 1.94355      | 0.0681  |

Totals : 1.93537e4 2627.15918

Data File C:\Chem32\1\Data\NHC\KGP156\_NewRoute.D  
 Sample Name: KGP156\_NewRoute

Signal 3: DAD1 C, Sig=210,8 Ref=off

| Peak # | RetTime [min] | Type | Width [min] | Area [mAU*s] | Height [mAU] | Area %  |
|--------|---------------|------|-------------|--------------|--------------|---------|
| 1      | 0.105         | BB   | 0.0949      | 14.51359     | 2.14511      | 0.0469  |
| 2      | 1.039         | BV   | 0.0426      | 435.94681    | 165.97623    | 1.4097  |
| 3      | 1.146         | VV   | 0.1043      | 155.01181    | 21.97941     | 0.5013  |
| 4      | 1.337         | VV   | 0.1198      | 213.80933    | 24.02304     | 0.6914  |
| 5      | 1.519         | VB   | 0.0853      | 289.87567    | 50.21970     | 0.9374  |
| 6      | 1.647         | BV   | 0.0672      | 84.60459     | 19.26048     | 0.2736  |
| 7      | 1.748         | VB   | 0.0580      | 49.05077     | 13.01072     | 0.1586  |
| 8      | 1.873         | BB   | 0.1706      | 178.12035    | 15.91610     | 0.5760  |
| 9      | 8.008         | BB   | 0.2266      | 37.89616     | 2.24884      | 0.1225  |
| 10     | 10.789        | VB   | 0.1108      | 102.47525    | 14.43470     | 0.3314  |
| 11     | 12.199        | BV   | 0.1615      | 30.62111     | 3.04053      | 0.0990  |
| 12     | 12.434        | VB   | 0.1266      | 12.30986     | 1.34753      | 0.0398  |
| 13     | 13.319        | BB   | 0.1477      | 11.35693     | 1.08865      | 0.0367  |
| 14     | 14.969        | VB   | 0.1036      | 11.77649     | 1.72702      | 0.0381  |
| 15     | 15.524        | BB   | 0.1160      | 48.63016     | 6.16380      | 0.1573  |
| 16     | 15.917        | BV   | 0.0831      | 11.59196     | 2.14212      | 0.0375  |
| 17     | 16.026        | VB   | 0.0814      | 8.38063      | 1.59134      | 0.0271  |
| 18     | 16.634        | VV   | 0.0878      | 116.36454    | 20.63740     | 0.3763  |
| 19     | 16.873        | VB   | 0.0894      | 14.29773     | 2.47631      | 0.0462  |
| 20     | 17.577        | BV   | 0.1248      | 8.98047      | 1.15382      | 0.0290  |
| 21     | 17.770        | VB   | 0.0997      | 16.80680     | 2.58943      | 0.0543  |
| 22     | 18.122        | BV   | 0.0928      | 41.97680     | 6.91610      | 0.1357  |
| 23     | 18.500        | VV   | 0.1642      | 125.87863    | 11.82832     | 0.4071  |
| 24     | 18.707        | VB   | 0.1129      | 11.68607     | 1.49987      | 0.0378  |
| 25     | 19.147        | VV   | 0.0992      | 194.16022    | 30.93661     | 0.6279  |
| 26     | 19.446        | VV   | 0.0920      | 232.49939    | 38.72795     | 0.7518  |
| 27     | 19.584        | VB   | 0.0982      | 241.77089    | 36.99688     | 0.7818  |
| 28     | 20.204        | BB   | 0.1620      | 2.80380e4    | 2820.07422   | 90.6674 |
| 29     | 21.698        | BV   | 0.1452      | 17.81673     | 1.74420      | 0.0576  |
| 30     | 22.046        | VB   | 0.0909      | 6.75678      | 1.17809      | 0.0218  |
| 31     | 22.444        | BB   | 0.1132      | 8.46806      | 1.18758      | 0.0274  |
| 32     | 22.982        | BV   | 0.1003      | 11.69455     | 1.78918      | 0.0378  |
| 33     | 23.769        | BV   | 0.1963      | 15.29358     | 1.00057      | 0.0495  |
| 34     | 24.127        | VV   | 0.1256      | 16.37481     | 1.88088      | 0.0530  |
| 35     | 25.548        | BB   | 0.1049      | 35.16088     | 5.19697      | 0.1137  |
| 36     | 26.172        | BB   | 0.1060      | 13.36985     | 1.85652      | 0.0432  |
| 37     | 27.752        | BB   | 0.1713      | 60.69699     | 5.39515      | 0.1963  |

Totals : 3.09240e4 3341.38136

Signal 4: DAD1 D, Sig=230,16 Ref=off

| Peak # | RetTime [min] | Type | Width [min] | Area [mAU*s] | Height [mAU] | Area % |
|--------|---------------|------|-------------|--------------|--------------|--------|
| 1      | 1.036         | BV   | 0.0407      | 124.66803    | 50.76436     | 0.4319 |
| 2      | 1.130         | VV   | 0.1155      | 55.39950     | 7.06510      | 0.1919 |
| 3      | 1.337         | VV   | 0.1235      | 92.19374     | 9.82043      | 0.3194 |
| 4      | 1.519         | VV   | 0.1310      | 130.97940    | 13.77194     | 0.4537 |

Data File C:\Chem32\1\Data\NHC\KGP156\_NewRoute.D  
 Sample Name: KGP156\_NewRoute

| Peak #   | RetTime [min] | Type | Width [min] | Area [mAU*s] | Height [mAU] | Area %  |
|----------|---------------|------|-------------|--------------|--------------|---------|
| 5        | 1.649         | VV   | 0.0919      | 88.31196     | 13.57421     | 0.3059  |
| 6        | 1.744         | VB   | 0.0647      | 55.18219     | 13.22710     | 0.1912  |
| 7        | 1.901         | BB   | 0.2079      | 208.21948    | 14.63946     | 0.7213  |
| 8        | 10.789        | BB   | 0.1151      | 25.48580     | 3.41192      | 0.0883  |
| 9        | 12.202        | BB   | 0.1523      | 29.56805     | 3.18566      | 0.1024  |
| 10       | 15.526        | BV   | 0.1148      | 41.98088     | 5.39564      | 0.1454  |
| 11       | 15.917        | VB   | 0.1161      | 12.78415     | 1.58488      | 0.0443  |
| 12       | 16.634        | VB   | 0.0876      | 91.07066     | 16.19882     | 0.3155  |
| 13       | 17.580        | BV   | 0.1186      | 10.71600     | 1.41125      | 0.0371  |
| 14       | 17.771        | VB   | 0.1056      | 7.44635      | 1.03965      | 0.0258  |
| 15       | 18.121        | BB   | 0.0887      | 28.08753     | 4.90946      | 0.0973  |
| 16       | 18.501        | BV   | 0.1604      | 82.86704     | 8.16548      | 0.2871  |
| 17       | 19.147        | BB   | 0.1000      | 66.43429     | 10.47385     | 0.2301  |
| 18       | 19.447        | BV   | 0.0948      | 162.44650    | 26.75455     | 0.5627  |
| 19       | 19.583        | VB   | 0.0930      | 84.30189     | 13.47432     | 0.2920  |
| 20       | 20.203        | BB   | 0.1493      | 2.74223e4    | 2980.54883   | 94.9922 |
| 21       | 21.697        | BV   | 0.1498      | 22.20905     | 2.09263      | 0.0769  |
| 22       | 22.448        | BB   | 0.1091      | 11.10630     | 1.59686      | 0.0385  |
| 23       | 24.127        | BB   | 0.0930      | 8.46844      | 1.39141      | 0.0293  |
| 24       | 26.173        | BB   | 0.0784      | 5.73531      | 1.18555      | 0.0199  |
| Totals : |               |      |             | 2.88680e4    | 3205.68335   |         |

Signal 5: DAD1 E, Sig=240,4 Ref=off

| Peak #   | RetTime [min] | Type | Width [min] | Area [mAU*s] | Height [mAU] | Area %  |
|----------|---------------|------|-------------|--------------|--------------|---------|
| 1        | 1.031         | BB   | 0.0393      | 71.64593     | 30.66300     | 0.2831  |
| 2        | 1.122         | BB   | 0.0965      | 18.19417     | 2.92825      | 0.0719  |
| 3        | 1.528         | BV   | 0.1112      | 34.13404     | 4.46297      | 0.1349  |
| 4        | 1.656         | VB   | 0.1628      | 106.91344    | 8.61382      | 0.4224  |
| 5        | 1.907         | BB   | 0.2242      | 215.12267    | 13.77413     | 0.8499  |
| 6        | 10.789        | BB   | 0.1084      | 10.86397     | 1.53786      | 0.0429  |
| 7        | 12.203        | BB   | 0.1524      | 24.73338     | 2.66176      | 0.0977  |
| 8        | 15.527        | BB   | 0.1114      | 28.84837     | 3.94067      | 0.1140  |
| 9        | 16.634        | BB   | 0.0870      | 63.05199     | 11.31498     | 0.2491  |
| 10       | 17.581        | BV   | 0.1177      | 9.20557      | 1.22497      | 0.0364  |
| 11       | 18.123        | BB   | 0.0884      | 10.59986     | 1.86338      | 0.0419  |
| 12       | 18.501        | BV   | 0.1628      | 68.30199     | 6.70673      | 0.2698  |
| 13       | 19.147        | BV   | 0.1050      | 35.05600     | 5.17687      | 0.1385  |
| 14       | 19.447        | VV   | 0.0960      | 85.96707     | 13.92544     | 0.3396  |
| 15       | 19.583        | VB   | 0.0942      | 47.76067     | 7.51296      | 0.1887  |
| 16       | 20.204        | BB   | 0.1308      | 2.44483e4    | 3008.89478   | 96.5902 |
| 17       | 21.700        | BV   | 0.1403      | 14.35606     | 1.46525      | 0.0567  |
| 18       | 22.449        | BB   | 0.1070      | 11.76523     | 1.73853      | 0.0465  |
| 19       | 24.128        | BB   | 0.0921      | 6.53606      | 1.08784      | 0.0258  |
| Totals : |               |      |             | 2.53114e4    | 3129.49417   |         |

Data File C:\Chem32\1\Data\NHC\KGP156\_NewRoute.D  
Sample Name: KGP156\_NewRoute

Signal 6: DAD1 F, Sig=280,16 Ref=off

| Peak # | RetTime [min] | Type | Width [min] | Area [mAU*s] | Height [mAU] | Area %  |
|--------|---------------|------|-------------|--------------|--------------|---------|
| 1      | 1.029         | BB   | 0.0374      | 52.70672     | 22.45042     | 0.4345  |
| 2      | 1.688         | BB   | 0.2298      | 115.93475    | 7.44116      | 0.9557  |
| 3      | 1.908         | BB   | 0.3154      | 258.82291    | 11.04414     | 2.1337  |
| 4      | 12.200        | BB   | 0.1866      | 21.54193     | 1.76230      | 0.1776  |
| 5      | 15.529        | BV   | 0.1054      | 14.69091     | 2.10641      | 0.1211  |
| 6      | 15.917        | VB   | 0.0933      | 14.84133     | 2.49962      | 0.1223  |
| 7      | 16.634        | BB   | 0.0869      | 30.46751     | 5.47958      | 0.2512  |
| 8      | 18.121        | BV   | 0.0907      | 17.59917     | 2.99044      | 0.1451  |
| 9      | 18.501        | VB   | 0.1643      | 31.84293     | 3.03732      | 0.2625  |
| 10     | 19.146        | BV   | 0.1049      | 15.22276     | 2.19395      | 0.1255  |
| 11     | 19.446        | VB   | 0.1141      | 62.17640     | 8.05141      | 0.5126  |
| 12     | 20.204        | BB   | 0.1095      | 1.14944e4    | 1646.40137   | 94.7582 |

Totals : 1.21302e4 1715.45812

Signal 7: DAD1 G, Sig=300,16 Ref=off

| Peak # | RetTime [min] | Type | Width [min] | Area [mAU*s] | Height [mAU] | Area %  |
|--------|---------------|------|-------------|--------------|--------------|---------|
| 1      | 1.028         | BB   | 0.0386      | 47.62583     | 20.87785     | 0.6285  |
| 2      | 1.707         | BB   | 0.2639      | 122.55516    | 6.68573      | 1.6174  |
| 3      | 1.908         | BB   | 0.3223      | 212.69646    | 8.85409      | 2.8070  |
| 4      | 12.201        | BB   | 0.1833      | 23.09685     | 1.93406      | 0.3048  |
| 5      | 15.537        | BV   | 0.1115      | 14.68926     | 2.00552      | 0.1939  |
| 6      | 15.917        | VB   | 0.0906      | 7.55386      | 1.28497      | 0.0997  |
| 7      | 16.634        | BB   | 0.0863      | 10.32639     | 1.87303      | 0.1363  |
| 8      | 18.122        | BB   | 0.0900      | 6.61254      | 1.13526      | 0.0873  |
| 9      | 18.501        | BB   | 0.1577      | 11.69376     | 1.17887      | 0.1543  |
| 10     | 19.146        | BV   | 0.1051      | 8.64193      | 1.24296      | 0.1140  |
| 11     | 19.446        | VV   | 0.0988      | 18.63790     | 2.90577      | 0.2460  |
| 12     | 19.583        | VB   | 0.0961      | 8.74240      | 1.34089      | 0.1154  |
| 13     | 20.204        | BB   | 0.1091      | 7084.46484   | 1018.61517   | 93.4954 |

Totals : 7577.33718 1069.93420

Signal 8: DAD1 H, Sig=320,16 Ref=off

| Peak # | RetTime [min] | Type | Width [min] | Area [mAU*s] | Height [mAU] | Area %  |
|--------|---------------|------|-------------|--------------|--------------|---------|
| 1      | 1.029         | BB   | 0.0366      | 48.09990     | 21.09005     | 2.1064  |
| 2      | 1.908         | BB   | 0.3984      | 238.60016    | 7.81096      | 10.4490 |
| 3      | 20.204        | BB   | 0.1091      | 1996.76819   | 287.26431    | 87.4445 |

Totals : 2283.46825 316.16533



Data File C:\Chem32\1\Data\NHC\KGP156\_NewRoute.D  
Sample Name: KGP156\_NewRoute

=====  
\*\*\* End of Report \*\*\*

**3-Methoxy-9-(3,4,5-trimethoxyphenyl)-6,7-dihydro-5H-benzo[7]annulen-4-amine (2)**

X-ray crystallographic data has been deposited with the Cambridge Crystallographic Data Centre. Deposition number: CCDC 1868223. Copies of the data can be obtained, free of charge, on application to CCDC, 12 Union Road, Cambridge CB2 1EZ, UK, (fax: +44-(0)1223-336033 or e-mail: deposit@ccdc.cam.ac.uk).

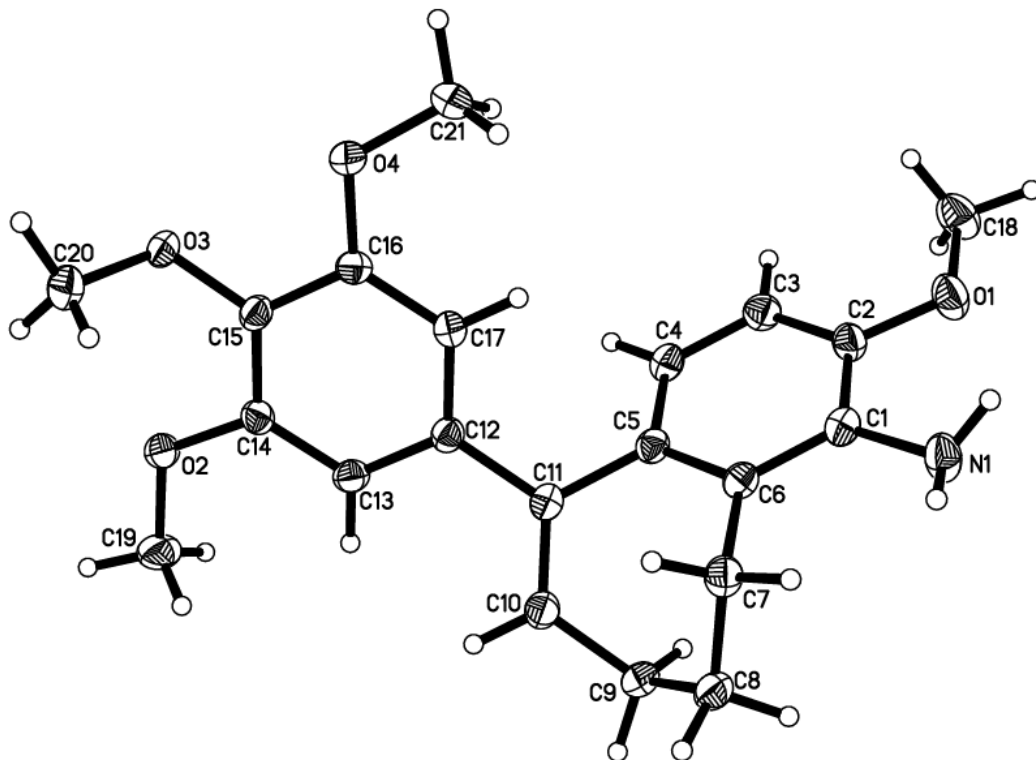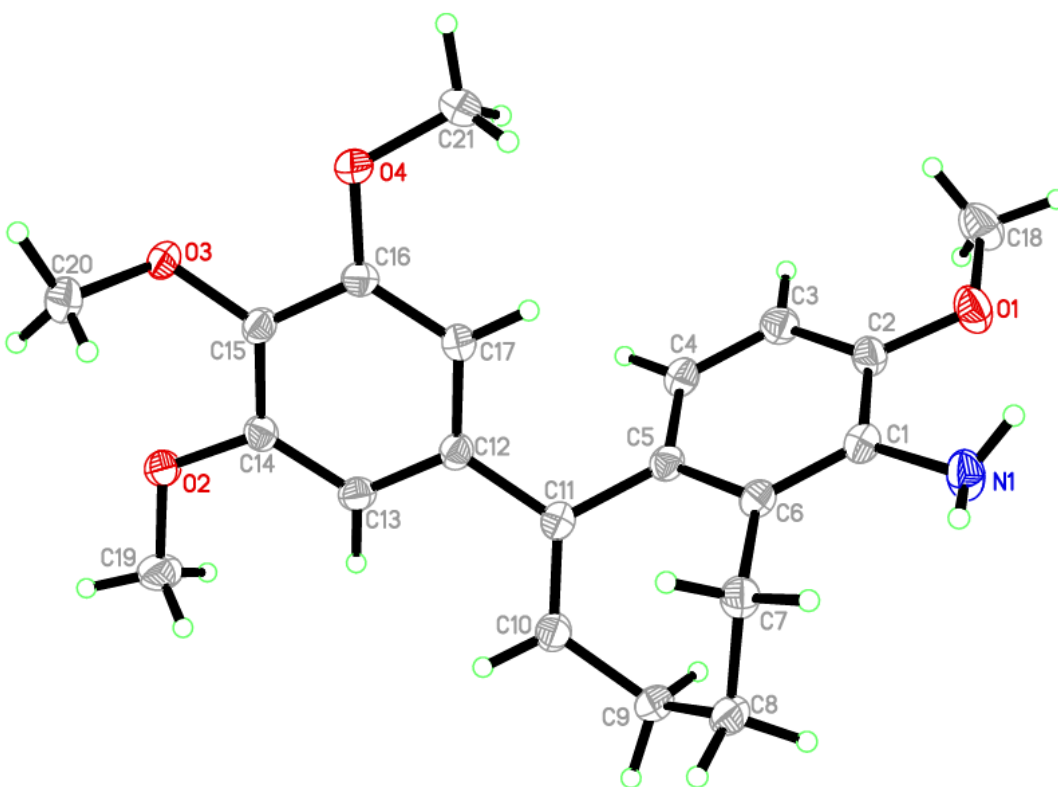

Table 1

|                                   |                                                  |                    |
|-----------------------------------|--------------------------------------------------|--------------------|
| Identification code               | KP84                                             |                    |
| Empirical formula                 | C <sub>21</sub> H <sub>25</sub> N O <sub>4</sub> |                    |
| Formula weight                    | 355.42                                           |                    |
| Temperature                       | 150(2) K                                         |                    |
| Wavelength                        | 0.71073 Å                                        |                    |
| Crystal system                    | Monoclinic                                       |                    |
| Space group                       | P2 <sub>1</sub> /c                               |                    |
| Unit cell dimensions              | a = 10.6830(3) Å                                 | α = 90°.           |
|                                   | b = 19.4724(6) Å                                 | β = 113.1761(10)°. |
|                                   | c = 9.4948(3) Å                                  | γ = 90°.           |
| Volume                            | 1815.75(10) Å <sup>3</sup>                       |                    |
| Z                                 | 4                                                |                    |
| Density (calculated)              | 1.300 Mg/m <sup>3</sup>                          |                    |
| Absorption coefficient            | 0.090 mm <sup>-1</sup>                           |                    |
| F(000)                            | 760                                              |                    |
| Crystal size                      | 0.532 x 0.209 x 0.139 mm <sup>3</sup>            |                    |
| Theta range for data collection   | 2.323 to 28.346°.                                |                    |
| Index ranges                      | -14 ≤ h ≤ 14, -25 ≤ k ≤ 25, -12 ≤ l ≤ 12         |                    |
| Reflections collected             | 21293                                            |                    |
| Independent reflections           | 4523 [R(int) = 0.0362]                           |                    |
| Completeness to theta = 25.242°   | 99.9 %                                           |                    |
| Absorption correction             | Semi-empirical from equivalents                  |                    |
| Max. and min. transmission        | 0.915 and 0.883                                  |                    |
| Refinement method                 | Full-matrix least-squares on F <sup>2</sup>      |                    |
| Data / restraints / parameters    | 4523 / 0 / 247                                   |                    |
| Goodness-of-fit on F <sup>2</sup> | 1.022                                            |                    |
| Final R indices [I > 2σ(I)]       | R1 = 0.0438, wR2 = 0.1038                        |                    |
| R indices (all data)              | R1 = 0.0616, wR2 = 0.1134                        |                    |
| Extinction coefficient            | n/a                                              |                    |
| Largest diff. peak and hole       | 0.297 and -0.215 e.Å <sup>-3</sup>               |                    |

Table 2

( $\times 10^4$ ) and equivalent isotropic displacement parameters ( $\text{\AA}^2 \times 10^3$ )

for KP84.  $U(\text{eq})$  is defined as one third of the trace of the orthogonalized  $U^{ij}$  tensor.

|       | x        | y       | z        | $U(\text{eq})$ |
|-------|----------|---------|----------|----------------|
| O(1)  | 10011(1) | 5280(1) | 12206(1) | 30(1)          |
| O(2)  | 4071(1)  | 7011(1) | 1615(1)  | 25(1)          |
| O(3)  | 4411(1)  | 5660(1) | 1233(1)  | 25(1)          |
| O(4)  | 6162(1)  | 4907(1) | 3470(1)  | 28(1)          |
| N(1)  | 11554(1) | 6150(1) | 11520(1) | 28(1)          |
| C(1)  | 10182(1) | 6119(1) | 10519(1) | 21(1)          |
| C(2)  | 9341(1)  | 5659(1) | 10896(1) | 22(1)          |
| C(3)  | 7972(1)  | 5601(1) | 9980(2)  | 24(1)          |
| C(4)  | 7408(1)  | 6012(1) | 8686(2)  | 22(1)          |
| C(5)  | 8202(1)  | 6480(1) | 8296(1)  | 19(1)          |
| C(6)  | 9612(1)  | 6531(1) | 9212(1)  | 20(1)          |
| C(7)  | 10482(1) | 7011(1) | 8720(2)  | 23(1)          |
| C(8)  | 10275(1) | 7776(1) | 8969(2)  | 25(1)          |
| C(9)  | 8754(1)  | 7952(1) | 8445(2)  | 24(1)          |
| C(10) | 7877(1)  | 7597(1) | 6977(2)  | 22(1)          |
| C(11) | 7583(1)  | 6923(1) | 6906(1)  | 19(1)          |
| C(12) | 6692(1)  | 6589(1) | 5440(1)  | 19(1)          |
| C(13) | 5746(1)  | 6976(1) | 4258(2)  | 21(1)          |
| C(14) | 5012(1)  | 6673(1) | 2848(1)  | 20(1)          |
| C(15) | 5178(1)  | 5979(1) | 2596(1)  | 20(1)          |
| C(16) | 6080(1)  | 5588(1) | 3794(1)  | 20(1)          |
| C(17) | 6839(1)  | 5891(1) | 5200(1)  | 20(1)          |
| C(18) | 9216(2)  | 4802(1) | 12634(2) | 34(1)          |
| C(19) | 3877(2)  | 7721(1) | 1781(2)  | 35(1)          |
| C(20) | 4581(2)  | 5918(1) | -95(2)   | 28(1)          |
| C(21) | 6863(2)  | 4469(1) | 4739(2)  | 39(1)          |

Table 3

KP84.

---

|                  |            |
|------------------|------------|
| O(1)-C(2)        | 1.3792(16) |
| O(1)-C(18)       | 1.4236(18) |
| O(2)-C(14)       | 1.3737(15) |
| O(2)-C(19)       | 1.4168(17) |
| O(3)-C(15)       | 1.3772(15) |
| O(3)-C(20)       | 1.4335(16) |
| O(4)-C(16)       | 1.3719(16) |
| O(4)-C(21)       | 1.4250(17) |
| N(1)-C(1)        | 1.3996(17) |
| C(1)-C(6)        | 1.4005(18) |
| C(1)-C(2)        | 1.4109(19) |
| C(2)-C(3)        | 1.3813(19) |
| C(3)-C(4)        | 1.3888(19) |
| C(4)-C(5)        | 1.3920(19) |
| C(5)-C(6)        | 1.4160(18) |
| C(5)-C(11)       | 1.4949(17) |
| C(6)-C(7)        | 1.5145(18) |
| C(7)-C(8)        | 1.5378(19) |
| C(8)-C(9)        | 1.540(2)   |
| C(9)-C(10)       | 1.5065(17) |
| C(10)-C(11)      | 1.3443(19) |
| C(11)-C(12)      | 1.4914(17) |
| C(12)-C(13)      | 1.3971(18) |
| C(12)-C(17)      | 1.3973(18) |
| C(13)-C(14)      | 1.3883(17) |
| C(14)-C(15)      | 1.3960(18) |
| C(15)-C(16)      | 1.3917(18) |
| C(16)-C(17)      | 1.3917(17) |
| <br>             |            |
| C(2)-O(1)-C(18)  | 116.82(11) |
| C(14)-O(2)-C(19) | 117.55(10) |
| C(15)-O(3)-C(20) | 115.77(10) |

|                   |            |
|-------------------|------------|
| C(16)-O(4)-C(21)  | 116.69(10) |
| N(1)-C(1)-C(6)    | 123.38(12) |
| N(1)-C(1)-C(2)    | 117.16(12) |
| C(6)-C(1)-C(2)    | 119.43(12) |
| O(1)-C(2)-C(3)    | 124.73(12) |
| O(1)-C(2)-C(1)    | 114.35(11) |
| C(3)-C(2)-C(1)    | 120.91(12) |
| C(2)-C(3)-C(4)    | 119.57(13) |
| C(3)-C(4)-C(5)    | 121.03(12) |
| C(4)-C(5)-C(6)    | 119.65(12) |
| C(4)-C(5)-C(11)   | 120.59(11) |
| C(6)-C(5)-C(11)   | 119.75(11) |
| C(1)-C(6)-C(5)    | 119.38(12) |
| C(1)-C(6)-C(7)    | 121.43(12) |
| C(5)-C(6)-C(7)    | 119.15(11) |
| C(6)-C(7)-C(8)    | 113.99(11) |
| C(7)-C(8)-C(9)    | 111.31(11) |
| C(10)-C(9)-C(8)   | 112.92(11) |
| C(11)-C(10)-C(9)  | 122.79(12) |
| C(10)-C(11)-C(12) | 121.53(12) |
| C(10)-C(11)-C(5)  | 120.34(11) |
| C(12)-C(11)-C(5)  | 118.07(11) |
| C(13)-C(12)-C(17) | 118.98(11) |
| C(13)-C(12)-C(11) | 120.63(12) |
| C(17)-C(12)-C(11) | 120.31(11) |
| C(14)-C(13)-C(12) | 120.12(12) |
| O(2)-C(14)-C(13)  | 124.41(12) |
| O(2)-C(14)-C(15)  | 114.64(11) |
| C(13)-C(14)-C(15) | 120.95(11) |
| O(3)-C(15)-C(16)  | 119.08(11) |
| O(3)-C(15)-C(14)  | 121.91(11) |
| C(16)-C(15)-C(14) | 118.87(11) |
| O(4)-C(16)-C(15)  | 115.47(11) |
| O(4)-C(16)-C(17)  | 124.07(11) |
| C(15)-C(16)-C(17) | 120.46(12) |
| C(16)-C(17)-C(12) | 120.55(12) |

Table 4

( $\text{\AA}^2 \times 10^3$ ) for KP84. The anisotropic displacement factor exponent takes the form:  $-2\pi^2 [ h^2 a^{*2} U^{11} + \dots + 2 h k a^* b^* U^{12} ]$

|       | $U^{11}$ | $U^{22}$ | $U^{33}$ | $U^{23}$ | $U^{13}$ | $U^{12}$ |
|-------|----------|----------|----------|----------|----------|----------|
| O(1)  | 28(1)    | 34(1)    | 26(1)    | 11(1)    | 8(1)     | 0(1)     |
| O(2)  | 24(1)    | 19(1)    | 23(1)    | 1(1)     | -1(1)    | 2(1)     |
| O(3)  | 29(1)    | 23(1)    | 16(1)    | -2(1)    | 4(1)     | -8(1)    |
| O(4)  | 39(1)    | 17(1)    | 21(1)    | -2(1)    | 3(1)     | 2(1)     |
| N(1)  | 20(1)    | 37(1)    | 25(1)    | 7(1)     | 5(1)     | -1(1)    |
| C(1)  | 18(1)    | 24(1)    | 20(1)    | -2(1)    | 7(1)     | 0(1)     |
| C(2)  | 25(1)    | 23(1)    | 18(1)    | 2(1)     | 7(1)     | 1(1)     |
| C(3)  | 24(1)    | 24(1)    | 24(1)    | 1(1)     | 10(1)    | -4(1)    |
| C(4)  | 19(1)    | 26(1)    | 21(1)    | -2(1)    | 6(1)     | -2(1)    |
| C(5)  | 20(1)    | 20(1)    | 17(1)    | -3(1)    | 7(1)     | 0(1)     |
| C(6)  | 20(1)    | 21(1)    | 18(1)    | -2(1)    | 8(1)     | -1(1)    |
| C(7)  | 20(1)    | 27(1)    | 21(1)    | 1(1)     | 8(1)     | -2(1)    |
| C(8)  | 25(1)    | 26(1)    | 22(1)    | -2(1)    | 7(1)     | -7(1)    |
| C(9)  | 27(1)    | 21(1)    | 22(1)    | -4(1)    | 7(1)     | -2(1)    |
| C(10) | 22(1)    | 22(1)    | 20(1)    | -1(1)    | 6(1)     | 1(1)     |
| C(11) | 18(1)    | 22(1)    | 18(1)    | -2(1)    | 6(1)     | 1(1)     |
| C(12) | 18(1)    | 21(1)    | 18(1)    | -1(1)    | 7(1)     | -2(1)    |
| C(13) | 21(1)    | 17(1)    | 23(1)    | -2(1)    | 7(1)     | 0(1)     |
| C(14) | 16(1)    | 20(1)    | 20(1)    | 2(1)     | 4(1)     | -1(1)    |
| C(15) | 19(1)    | 22(1)    | 17(1)    | -2(1)    | 6(1)     | -4(1)    |
| C(16) | 22(1)    | 17(1)    | 21(1)    | 0(1)     | 9(1)     | -1(1)    |
| C(17) | 21(1)    | 20(1)    | 17(1)    | 1(1)     | 6(1)     | 1(1)     |
| C(18) | 37(1)    | 34(1)    | 34(1)    | 12(1)    | 16(1)    | 1(1)     |
| C(19) | 31(1)    | 19(1)    | 39(1)    | 1(1)     | -3(1)    | 3(1)     |
| C(20) | 36(1)    | 30(1)    | 20(1)    | -1(1)    | 10(1)    | 0(1)     |
| C(21) | 51(1)    | 19(1)    | 31(1)    | 3(1)     | 0(1)     | 2(1)     |

Table 5

---

[Å and °].

---

| D-H...A            | d(D-H)  | d(H...A) | d(D...A)   | <(DHA)    |
|--------------------|---------|----------|------------|-----------|
| N(1)-H(1)...O(2)#1 | 0.88(2) | 2.37(2)  | 3.1393(17) | 147.0(16) |

---

Symmetry transformations used to generate equivalent atoms:

#1 x+1,y,z+1



# 4-(2-isopropoxy-3-methoxyphenyl)butan-1-ol

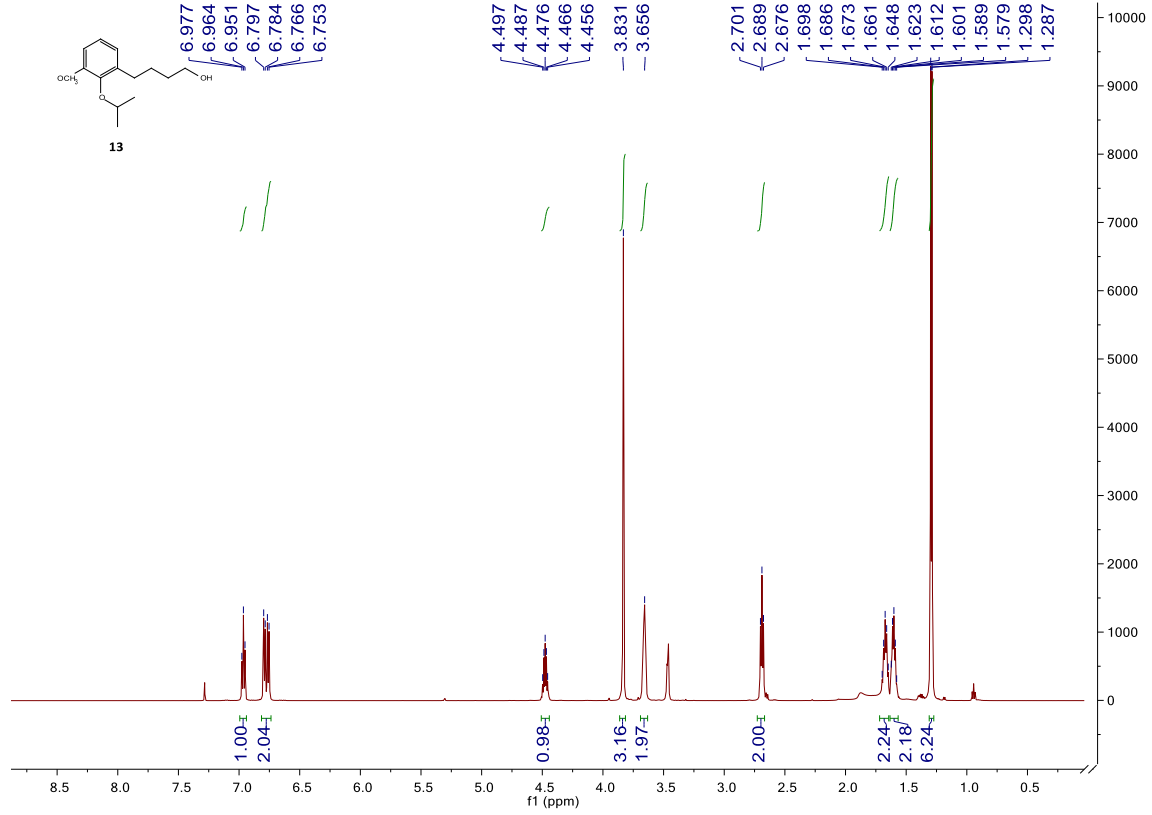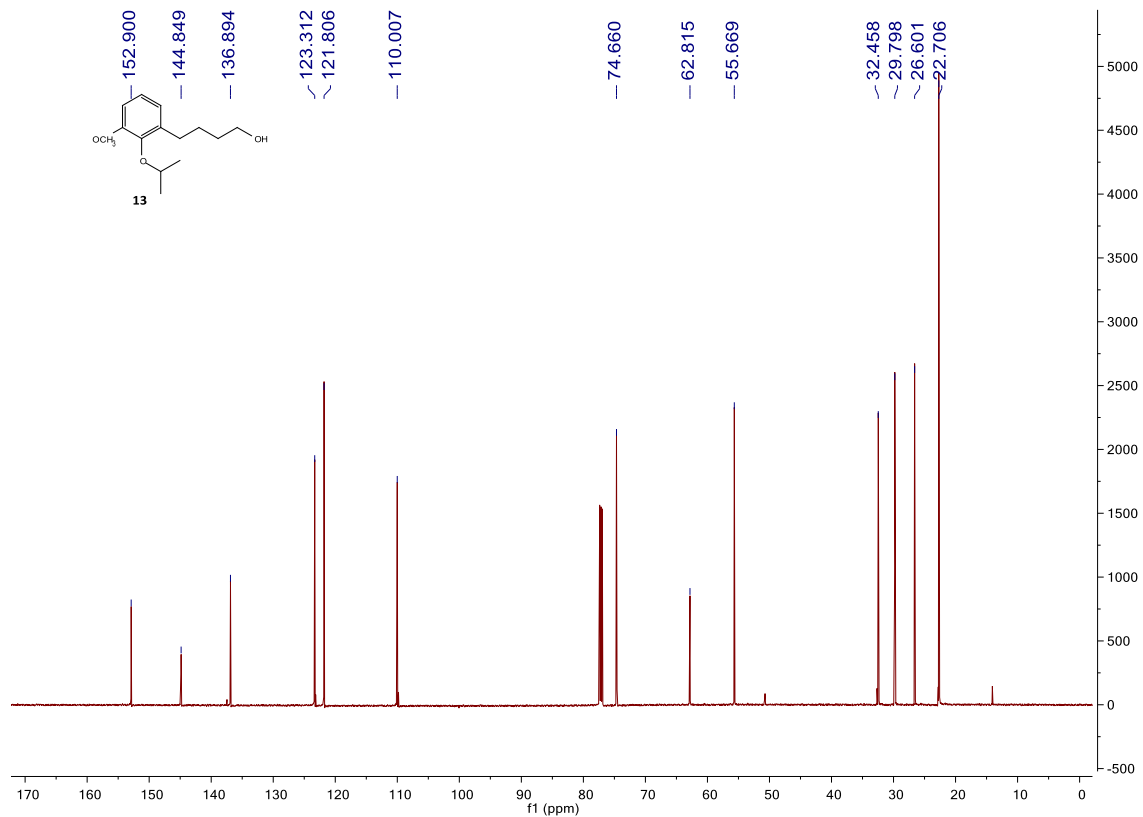

# 4-(2-isopropoxy-3-methoxyphenyl)butanoic acid

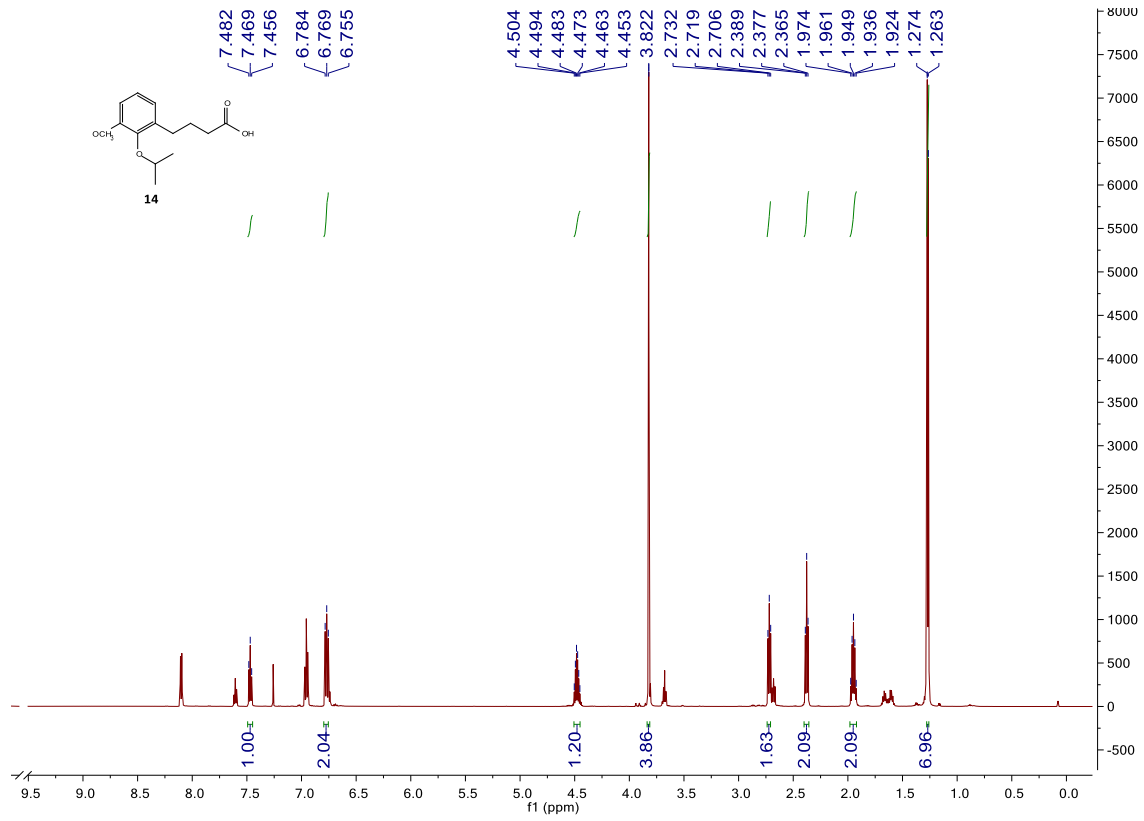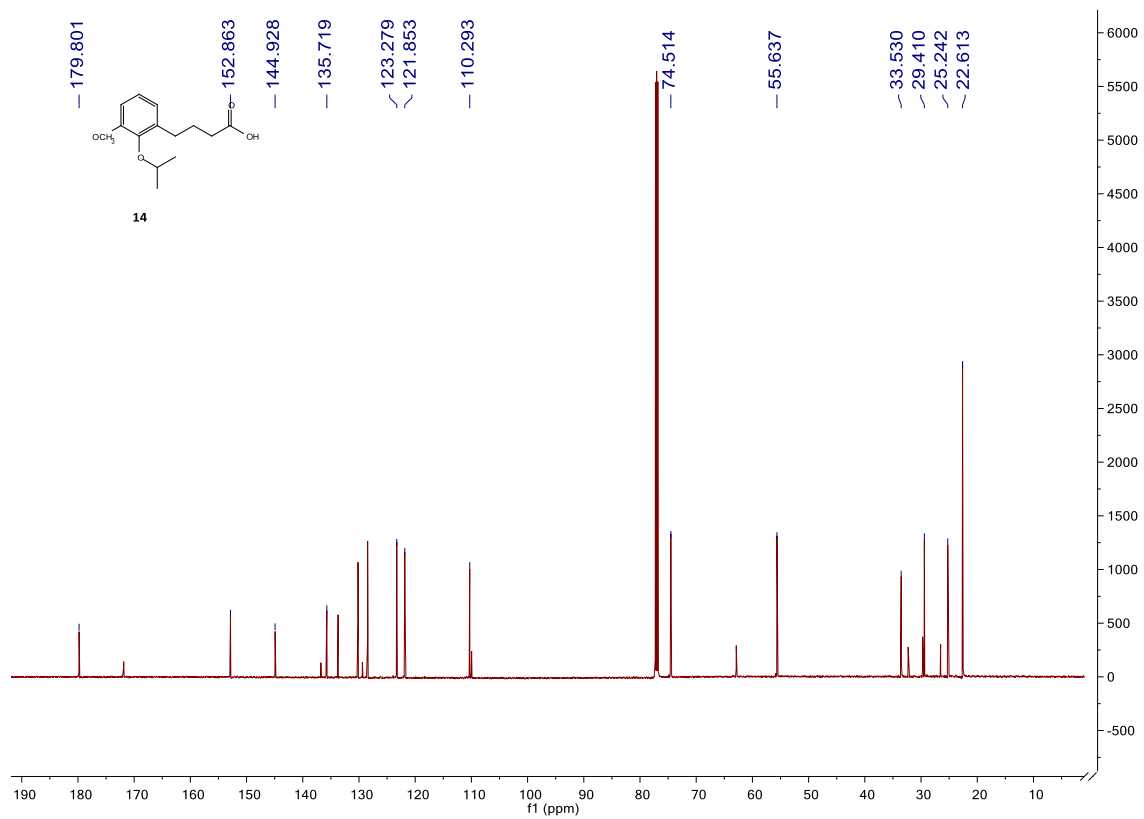

**5-isopropoxy-6-methoxy-3,4-dihydronaphthalen-1(2H)-one**

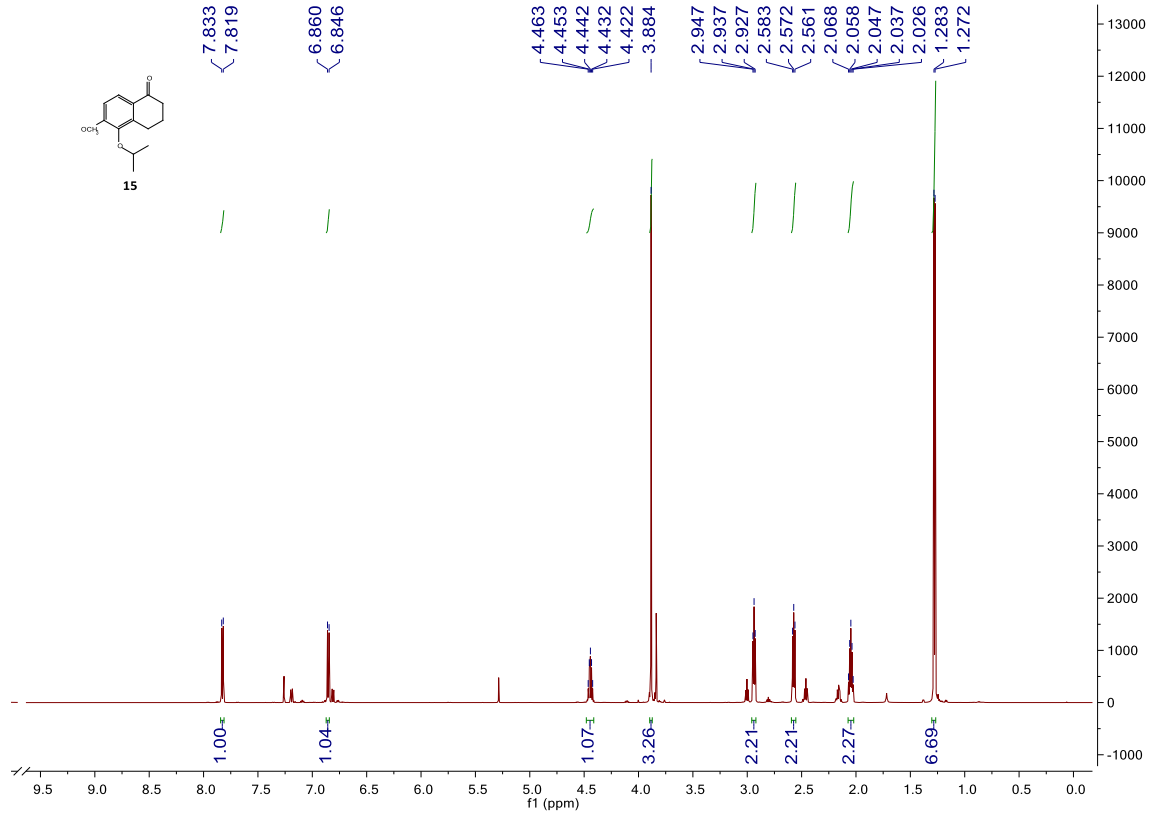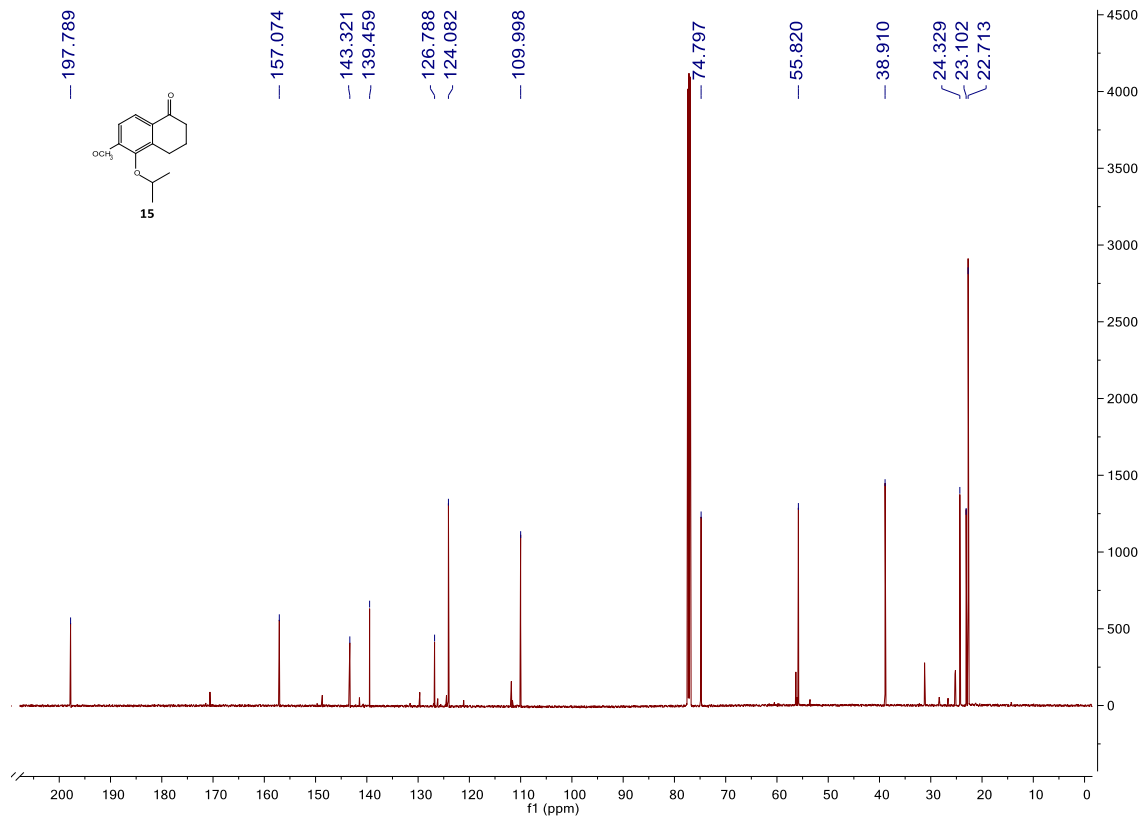

**8-isopropoxy-7-methoxy-4-(3,4,5-trimethoxyphenyl)-1,2-dihydronaphthalene**

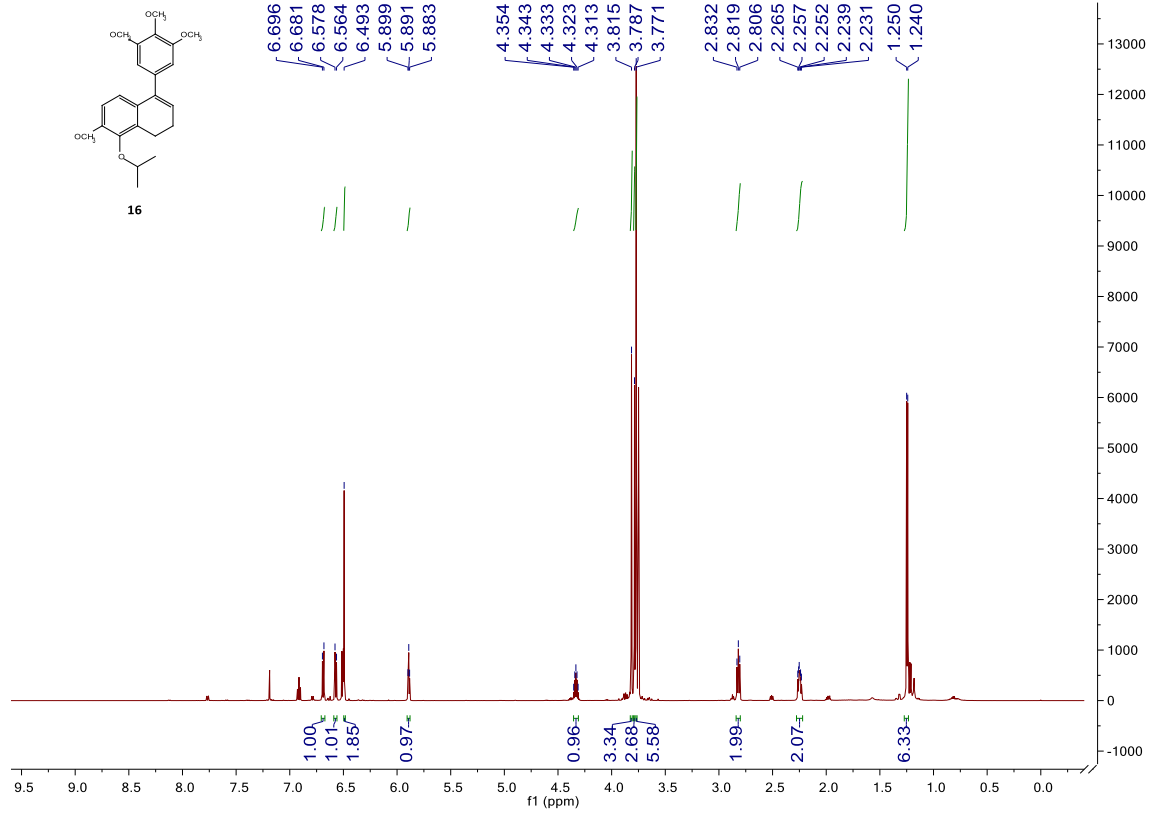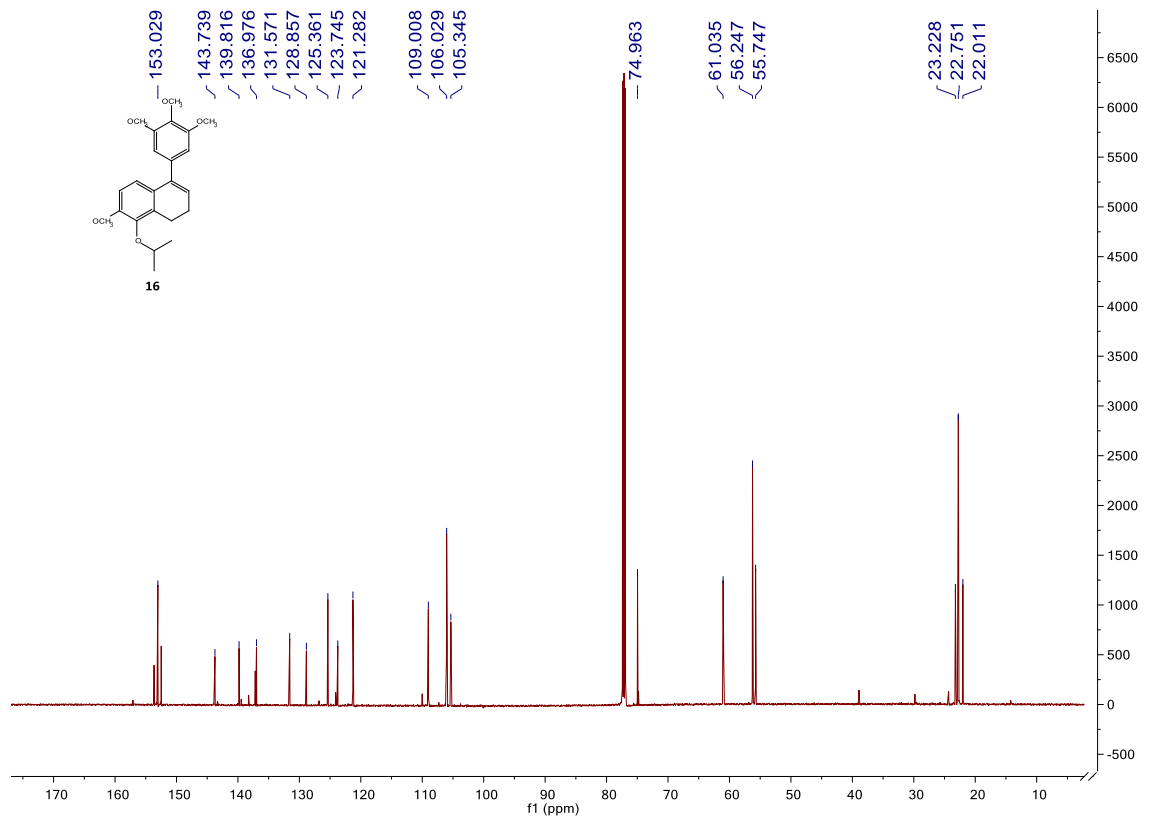

**2-methoxy-5-(3,4,5-trimethoxyphenyl)-7,8-dihydronaphthalen-1-ol**

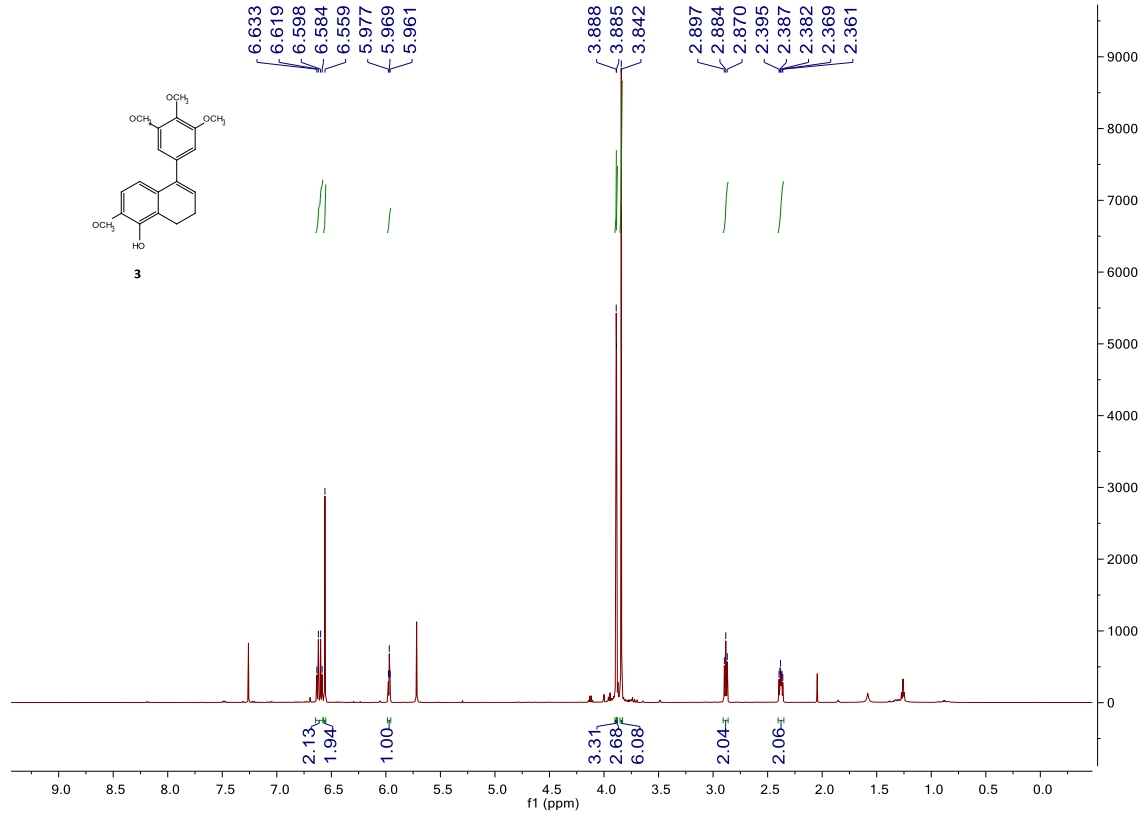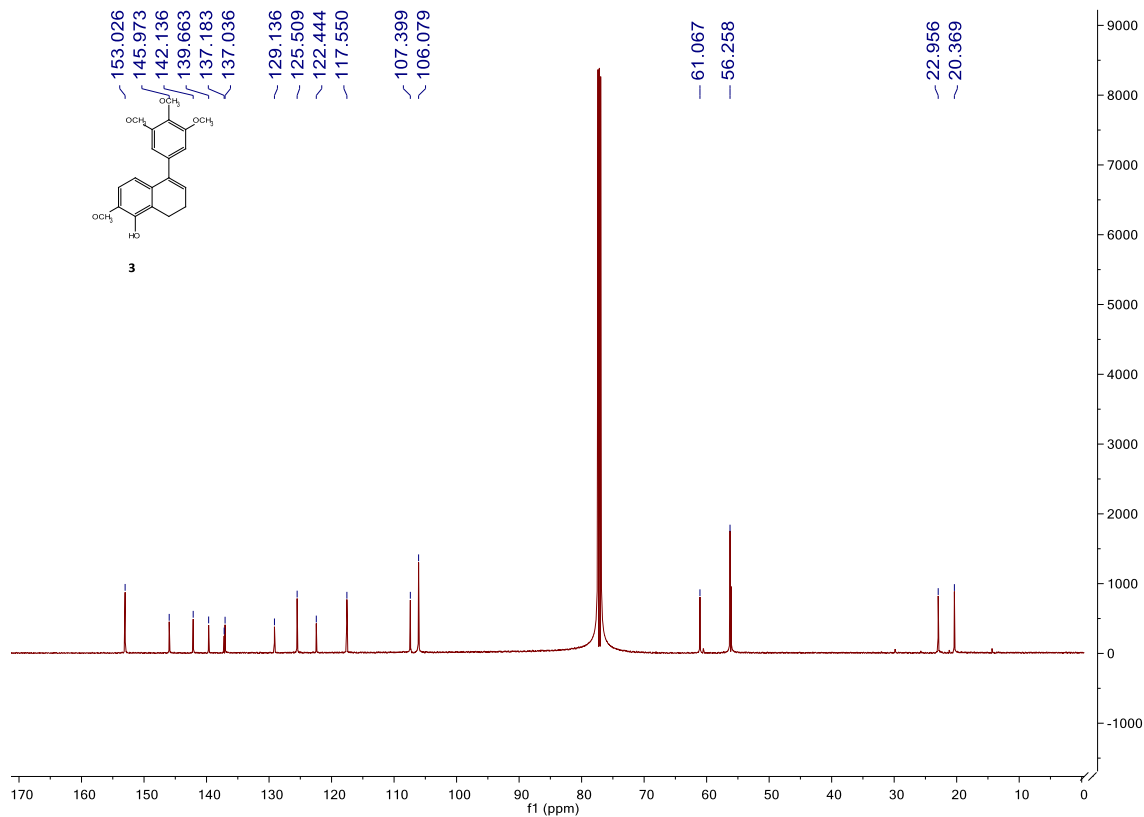

Oxi6196\_+ESI#2-20 RT: 0.01-0.15 AV: 19 NL: 3.45E8  
T: FTMS + p ESI Full ms [200.00-1000.00]

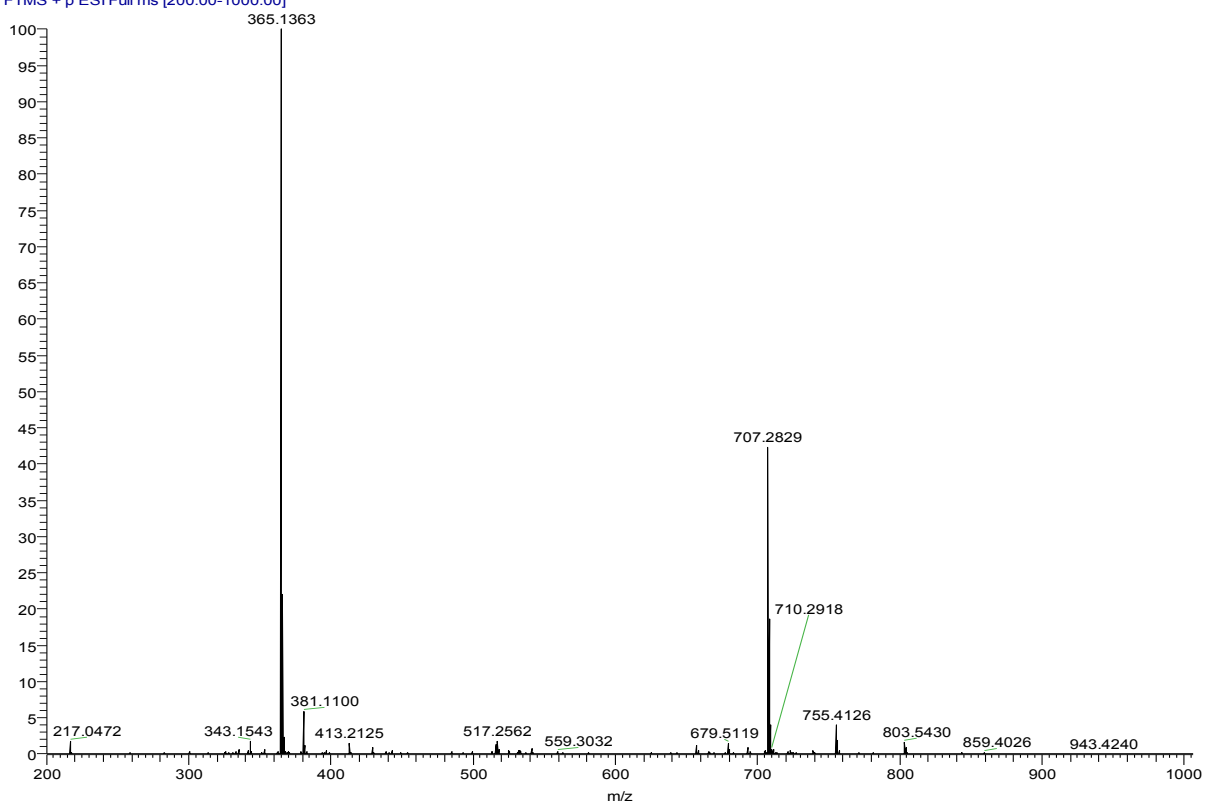

Data File C:\Chem32\1\Data\NHC\Oxi6196\_NewRoute\_Concentrated.D  
Sample Name: Oxi6196\_NewRoute\_Concentrated

=====

Acq. Operator : SYSTEM  
Sample Operator : SYSTEM  
Acq. Instrument : 1200 HPLC Location : 1  
Injection Date : 2/23/2018 2:00:43 PM  
Inj Volume : No inj

Acq. Method : C:\CHEM32\1\METHODS\MASTERMETHOD2.M  
Last changed : 12/2/2015 12:37:42 PM by Eric Lin  
Analysis Method : C:\Users\CHEMISTRY\Desktop\CHRISTINE\VANIHINGEDPHEN1.D\ACQ.M  
Last changed : 6/18/2014 3:18:53 PM by Christine  
Additional Info : Peak(s) manually integrated

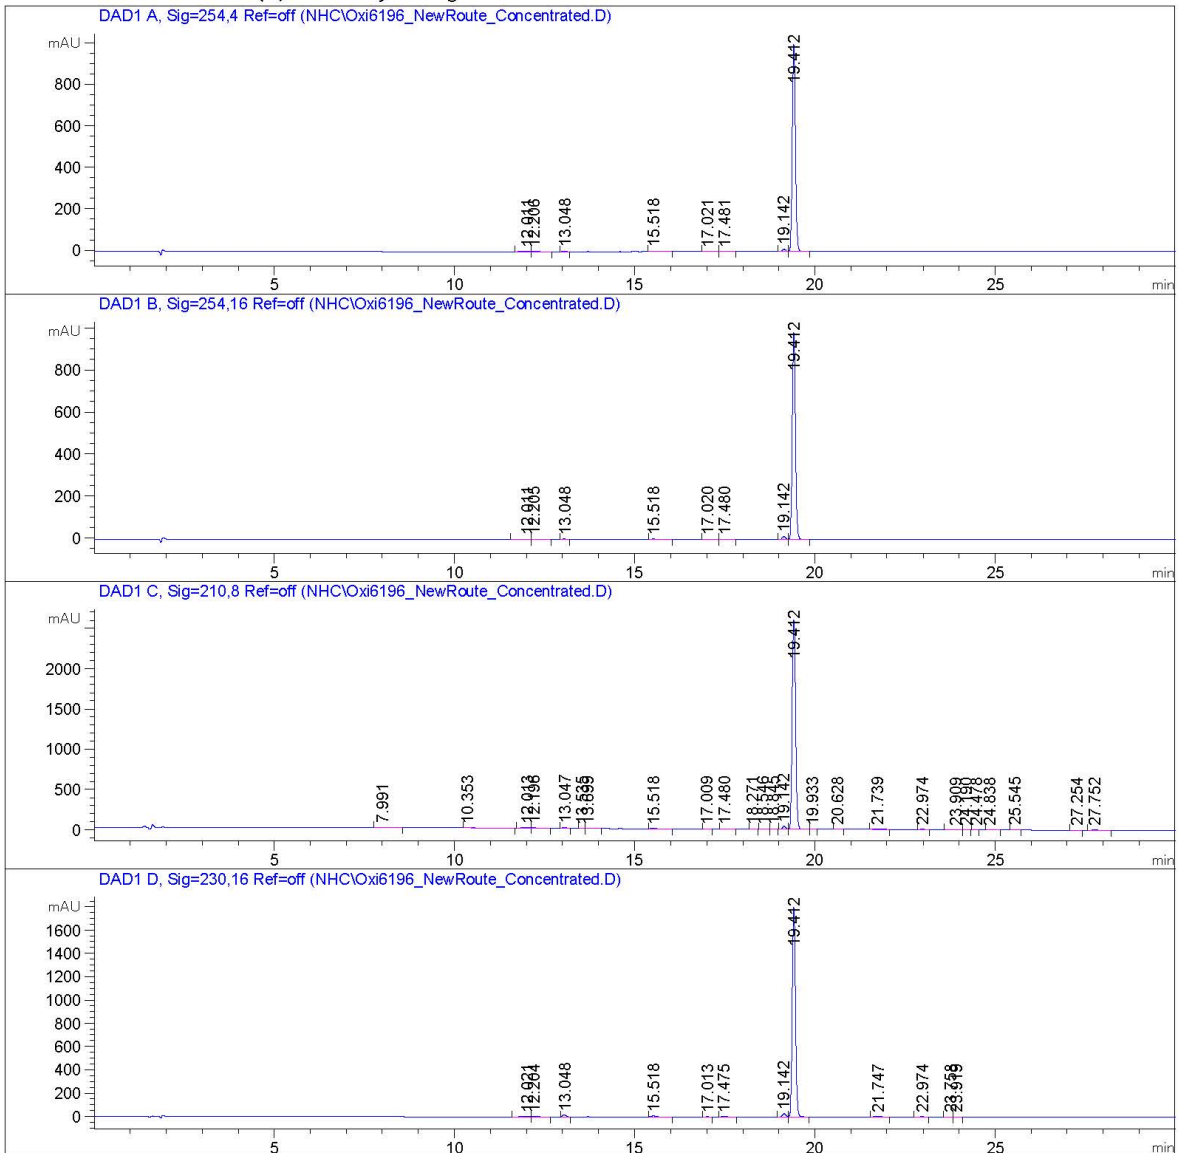

Data File C:\Chem32\1\Data\NHC\Oxi6196\_NewRoute\_Concentrated.D  
 Sample Name: Oxi6196\_NewRoute\_Concentrated

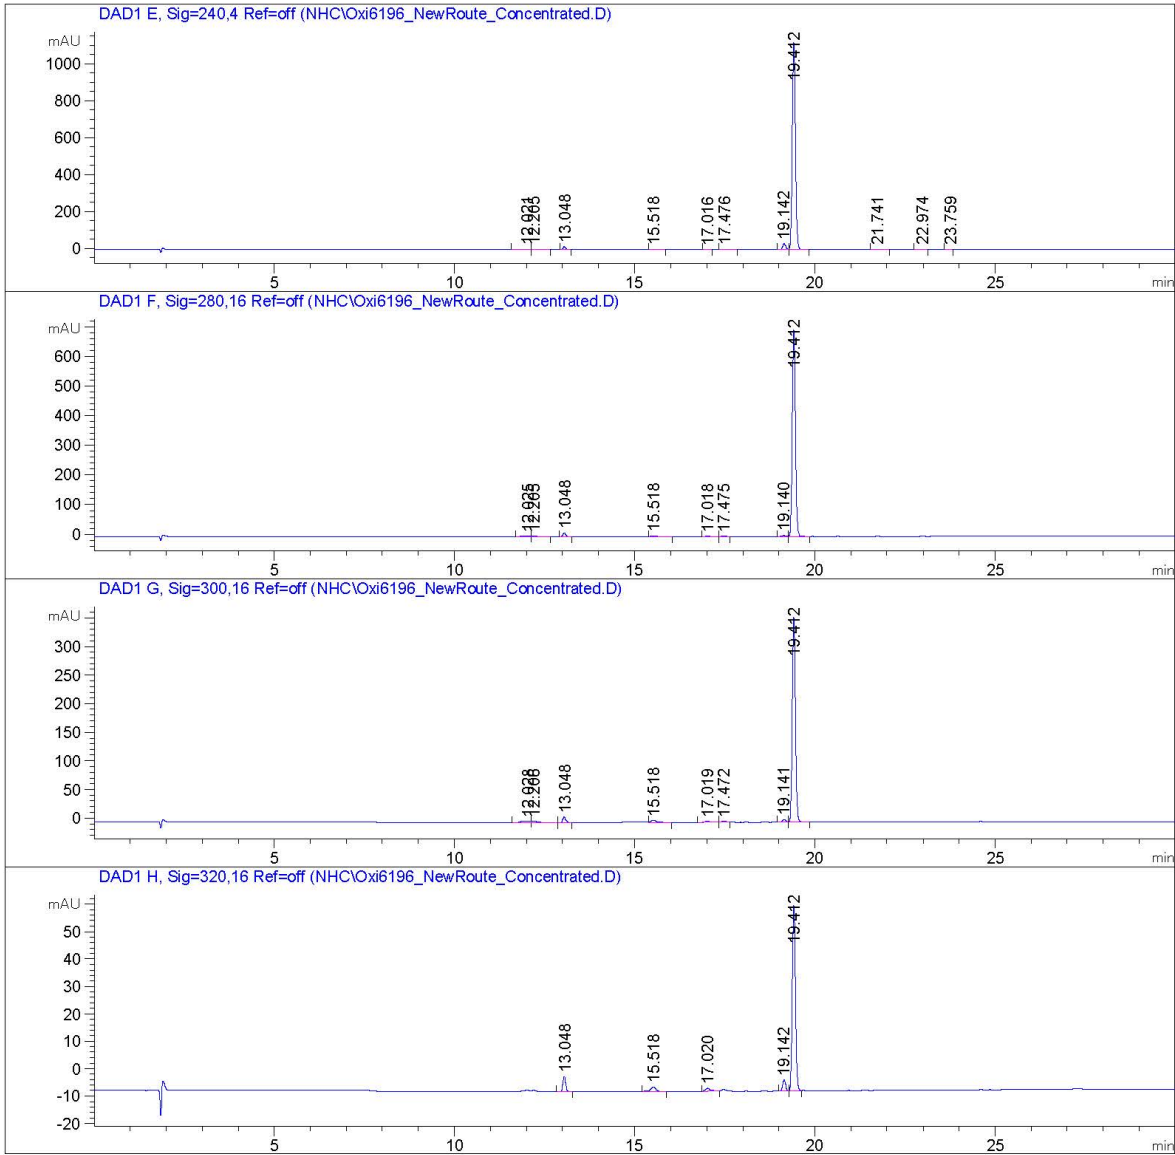

=====  
 Area Percent Report  
 =====

Sorted By : Signal  
 Multiplier : 1.0000  
 Dilution : 1.0000  
 Use Multiplier & Dilution Factor with ISTDs



Data File C:\Chem32\1\Data\NHC\Oxi6196\_NewRoute\_Concentrated.D  
Sample Name: Oxi6196\_NewRoute\_Concentrated

Signal 1: DAD1 A, Sig=254,4 Ref=off

| Peak # | RetTime [min] | Type | Width [min] | Area [mAU*s] | Height [mAU] | Area %  |
|--------|---------------|------|-------------|--------------|--------------|---------|
| 1      | 12.011        | BV   | 0.2356      | 25.94462     | 1.54712      | 0.4153  |
| 2      | 12.206        | VB   | 0.1592      | 15.38476     | 1.45636      | 0.2463  |
| 3      | 13.048        | BB   | 0.0815      | 14.16903     | 2.68909      | 0.2268  |
| 4      | 15.518        | BB   | 0.1419      | 22.86301     | 2.51919      | 0.3660  |
| 5      | 17.021        | BV   | 0.1589      | 13.92447     | 1.28000      | 0.2229  |
| 6      | 17.481        | VB   | 0.1641      | 19.77390     | 1.92113      | 0.3165  |
| 7      | 19.142        | BV   | 0.0931      | 69.27430     | 11.69412     | 1.1089  |
| 8      | 19.412        | VB   | 0.0930      | 6065.64063   | 997.05682    | 97.0972 |

Totals : 6246.97471 1020.16384

Signal 2: DAD1 B, Sig=254,16 Ref=off

| Peak # | RetTime [min] | Type | Width [min] | Area [mAU*s] | Height [mAU] | Area %  |
|--------|---------------|------|-------------|--------------|--------------|---------|
| 1      | 12.011        | BV   | 0.2370      | 28.48997     | 1.65403      | 0.4590  |
| 2      | 12.205        | VB   | 0.1612      | 16.67857     | 1.55450      | 0.2687  |
| 3      | 13.048        | BB   | 0.0816      | 18.67237     | 3.53612      | 0.3009  |
| 4      | 15.518        | BB   | 0.1403      | 23.33660     | 2.61046      | 0.3760  |
| 5      | 17.020        | BV   | 0.1597      | 13.83091     | 1.26343      | 0.2228  |
| 6      | 17.480        | VB   | 0.1620      | 20.06612     | 1.98399      | 0.3233  |
| 7      | 19.142        | BV   | 0.0931      | 85.47532     | 14.42553     | 1.3772  |
| 8      | 19.412        | VB   | 0.0930      | 5999.91992   | 986.17603    | 96.6720 |

Totals : 6206.46979 1013.20409

Signal 3: DAD1 C, Sig=210,8 Ref=off

| Peak # | RetTime [min] | Type | Width [min] | Area [mAU*s] | Height [mAU] | Area %  |
|--------|---------------|------|-------------|--------------|--------------|---------|
| 1      | 7.991         | BB   | 0.2184      | 35.31418     | 2.18658      | 0.1932  |
| 2      | 10.353        | BB   | 0.1655      | 20.85667     | 1.62749      | 0.1141  |
| 3      | 12.013        | BV   | 0.2216      | 59.31018     | 3.72882      | 0.3244  |
| 4      | 12.196        | VB   | 0.1565      | 32.59122     | 3.15524      | 0.1783  |
| 5      | 13.047        | VB   | 0.0823      | 86.97964     | 16.30069     | 0.4758  |
| 6      | 13.535        | BV   | 0.0798      | 12.35308     | 2.40875      | 0.0676  |
| 7      | 13.699        | VB   | 0.0836      | 15.58864     | 2.85865      | 0.0853  |
| 8      | 15.518        | VB   | 0.1527      | 59.03706     | 5.90197      | 0.3229  |
| 9      | 17.009        | BV   | 0.1354      | 15.70359     | 1.80748      | 0.0859  |
| 10     | 17.480        | BB   | 0.1542      | 45.39658     | 4.71963      | 0.2483  |
| 11     | 18.271        | VB   | 0.0972      | 8.59195      | 1.37032      | 0.0470  |
| 12     | 18.546        | BV   | 0.1449      | 10.00587     | 1.05247      | 0.0547  |
| 13     | 18.845        | VB   | 0.0950      | 14.51705     | 2.38708      | 0.0794  |
| 14     | 19.142        | BV   | 0.0930      | 220.43597    | 37.28934     | 1.2058  |
| 15     | 19.412        | VB   | 0.1060      | 1.73615e4    | 2596.37451   | 94.9662 |

Data File C:\Chem32\1\Data\NHC\Oxi6196\_NewRoute\_Concentrated.D  
 Sample Name: Oxi6196\_NewRoute\_Concentrated

| Peak # | RetTime [min] | Type | Width [min] | Area [mAU*s] | Height [mAU] | Area % |
|--------|---------------|------|-------------|--------------|--------------|--------|
| 16     | 19.933        | BB   | 0.0897      | 6.82932      | 1.21207      | 0.0374 |
| 17     | 20.628        | BB   | 0.0967      | 9.46331      | 1.51932      | 0.0518 |
| 18     | 21.739        | BB   | 0.1556      | 49.15228     | 4.42618      | 0.2689 |
| 19     | 22.974        | BB   | 0.0936      | 44.94076     | 7.53022      | 0.2458 |
| 20     | 23.909        | BV   | 0.1532      | 29.23256     | 2.63901      | 0.1599 |
| 21     | 24.190        | VB   | 0.1091      | 10.51668     | 1.47666      | 0.0575 |
| 22     | 24.478        | BV   | 0.0971      | 7.24885      | 1.12658      | 0.0397 |
| 23     | 24.838        | BB   | 0.1045      | 9.10787      | 1.32030      | 0.0498 |
| 24     | 25.545        | BB   | 0.1035      | 37.75469     | 5.68167      | 0.2065 |
| 25     | 27.254        | BB   | 0.1038      | 8.03404      | 1.14575      | 0.0439 |
| 26     | 27.752        | BB   | 0.1672      | 71.31586     | 6.53935      | 0.3901 |

Totals : 1.82818e4 2717.78615

Signal 4: DAD1 D, Sig=230,16 Ref=off

| Peak # | RetTime [min] | Type | Width [min] | Area [mAU*s] | Height [mAU] | Area %  |
|--------|---------------|------|-------------|--------------|--------------|---------|
| 1      | 12.021        | BV   | 0.2296      | 62.34489     | 3.75715      | 0.5322  |
| 2      | 12.204        | VB   | 0.1584      | 37.81323     | 3.54563      | 0.3228  |
| 3      | 13.048        | BB   | 0.0815      | 91.62273     | 17.37372     | 0.7821  |
| 4      | 15.518        | VB   | 0.1497      | 57.70858     | 5.92378      | 0.4926  |
| 5      | 17.013        | BB   | 0.1243      | 9.67194      | 1.25019      | 0.0826  |
| 6      | 17.475        | BB   | 0.1260      | 33.38165     | 3.89394      | 0.2849  |
| 7      | 19.142        | BV   | 0.0934      | 169.20265    | 28.44065     | 1.4443  |
| 8      | 19.412        | VV   | 0.0985      | 1.11758e4    | 1798.08618   | 95.3932 |
| 9      | 21.747        | VV   | 0.2146      | 43.50099     | 2.97559      | 0.3713  |
| 10     | 22.974        | BB   | 0.0951      | 17.62972     | 2.89247      | 0.1505  |
| 11     | 23.758        | BV   | 0.0988      | 6.95548      | 1.05711      | 0.0594  |
| 12     | 23.919        | VV   | 0.1050      | 9.87603      | 1.42280      | 0.0843  |

Totals : 1.17155e4 1870.61921

Signal 5: DAD1 E, Sig=240,4 Ref=off

| Peak # | RetTime [min] | Type | Width [min] | Area [mAU*s] | Height [mAU] | Area %  |
|--------|---------------|------|-------------|--------------|--------------|---------|
| 1      | 12.021        | BV   | 0.2334      | 52.25179     | 3.11979      | 0.7127  |
| 2      | 12.205        | VB   | 0.1585      | 31.45958     | 2.94728      | 0.4291  |
| 3      | 13.048        | BB   | 0.0817      | 84.91316     | 16.04879     | 1.1582  |
| 4      | 15.518        | VB   | 0.1429      | 41.86513     | 4.56853      | 0.5710  |
| 5      | 17.016        | BB   | 0.1222      | 7.97453      | 1.03152      | 0.1088  |
| 6      | 17.476        | BB   | 0.1287      | 25.47445     | 2.89384      | 0.3475  |
| 7      | 19.142        | BV   | 0.0929      | 191.41354    | 32.41834     | 2.6108  |
| 8      | 19.412        | VB   | 0.0931      | 6850.16895   | 1123.72144   | 93.4336 |
| 9      | 21.741        | BB   | 0.2086      | 26.25027     | 1.86012      | 0.3580  |
| 10     | 22.974        | BB   | 0.0966      | 11.58485     | 1.81287      | 0.1580  |
| 11     | 23.759        | BV   | 0.1015      | 8.23751      | 1.23984      | 0.1124  |

Data File C:\Chem32\1\Data\NHC\Oxi6196\_NewRoute\_Concentrated.D  
 Sample Name: Oxi6196\_NewRoute\_Concentrated

| Peak #   | RetTime [min] | Type | Width [min] | Area [mAU*s] | Height [mAU] | Area % |
|----------|---------------|------|-------------|--------------|--------------|--------|
| Totals : |               |      |             | 7331.59376   | 1191.66235   |        |

Signal 6: DAD1 F, Sig=280,16 Ref=off

| Peak #   | RetTime [min] | Type | Width [min] | Area [mAU*s] | Height [mAU] | Area %  |
|----------|---------------|------|-------------|--------------|--------------|---------|
| 1        | 12.025        | BV   | 0.2307      | 30.08454     | 1.80283      | 0.6769  |
| 2        | 12.205        | VB   | 0.1615      | 18.88387     | 1.75569      | 0.4249  |
| 3        | 13.048        | BB   | 0.0822      | 66.79344     | 12.53245     | 1.5029  |
| 4        | 15.518        | VB   | 0.1409      | 24.04367     | 2.67373      | 0.5410  |
| 5        | 17.018        | BB   | 0.1511      | 12.90658     | 1.26475      | 0.2904  |
| 6        | 17.475        | BB   | 0.1151      | 12.46462     | 1.63150      | 0.2805  |
| 7        | 19.140        | BV   | 0.0975      | 27.22408     | 4.32105      | 0.6126  |
| 8        | 19.412        | VB   | 0.0930      | 4251.80273   | 698.98523    | 95.6707 |
| Totals : |               |      |             | 4444.20353   | 724.96722    |         |

Signal 7: DAD1 G, Sig=300,16 Ref=off

| Peak #   | RetTime [min] | Type | Width [min] | Area [mAU*s] | Height [mAU] | Area %  |
|----------|---------------|------|-------------|--------------|--------------|---------|
| 1        | 12.028        | BV   | 0.2298      | 33.37157     | 1.98810      | 1.4075  |
| 2        | 12.206        | VB   | 0.1653      | 22.04439     | 1.95810      | 0.9298  |
| 3        | 13.048        | BB   | 0.0824      | 47.94264     | 8.96929      | 2.0221  |
| 4        | 15.518        | VB   | 0.1414      | 31.09973     | 3.44276      | 1.3117  |
| 5        | 17.019        | BV   | 0.1497      | 15.24822     | 1.51207      | 0.6431  |
| 6        | 17.472        | VB   | 0.1131      | 12.22469     | 1.63713      | 0.5156  |
| 7        | 19.141        | BV   | 0.0955      | 29.54172     | 4.82335      | 1.2460  |
| 8        | 19.412        | VB   | 0.0930      | 2179.48535   | 357.97537    | 91.9242 |
| Totals : |               |      |             | 2370.95831   | 382.30618    |         |

Signal 8: DAD1 H, Sig=320,16 Ref=off

| Peak #   | RetTime [min] | Type | Width [min] | Area [mAU*s] | Height [mAU] | Area %  |
|----------|---------------|------|-------------|--------------|--------------|---------|
| 1        | 13.048        | BB   | 0.0825      | 29.69995     | 5.54493      | 6.0118  |
| 2        | 15.518        | BB   | 0.1560      | 16.48550     | 1.60261      | 3.3370  |
| 3        | 17.020        | BB   | 0.1423      | 10.87157     | 1.12949      | 2.2006  |
| 4        | 19.142        | BV   | 0.0916      | 23.17568     | 4.00192      | 4.6912  |
| 5        | 19.412        | VB   | 0.0932      | 413.79181    | 67.79539     | 83.7594 |
| Totals : |               |      |             | 494.02451    | 80.07434     |         |

Data File C:\Chem32\1\Data\NHC\Oxi6196\_NewRoute\_Concentrated.D  
Sample Name: Oxi6196\_NewRoute\_Concentrated

=====  
\*\*\* End of Report \*\*\*

**2-methoxy-5-(3,4,5-trimethoxyphenyl)-7,8-dihydronaphthalen-1-yl trifluoromethanesulfonate**

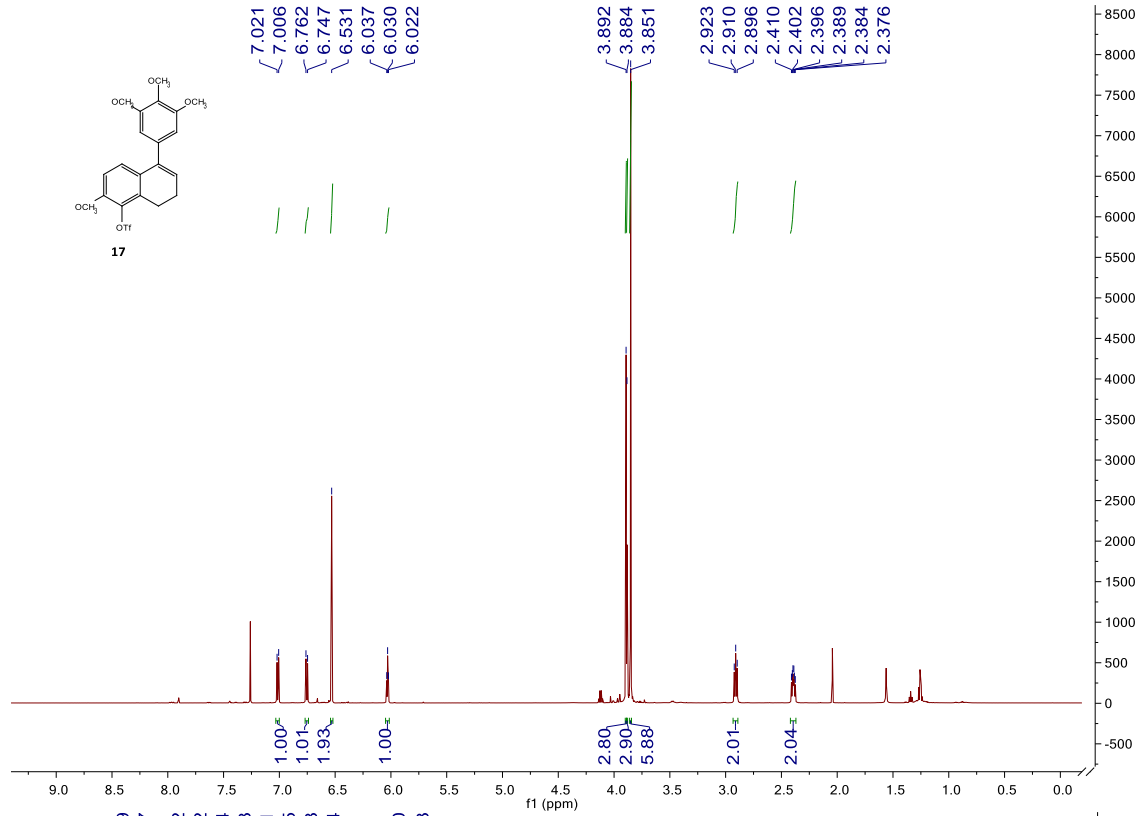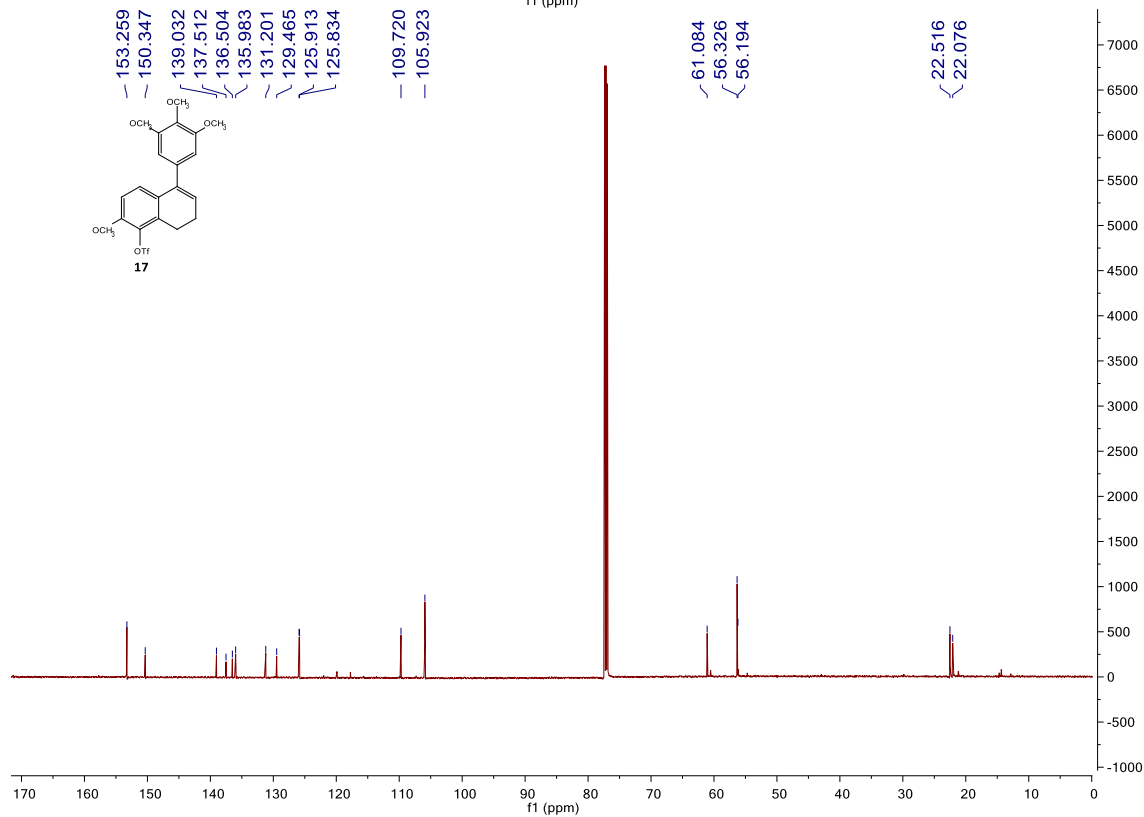

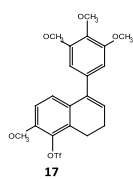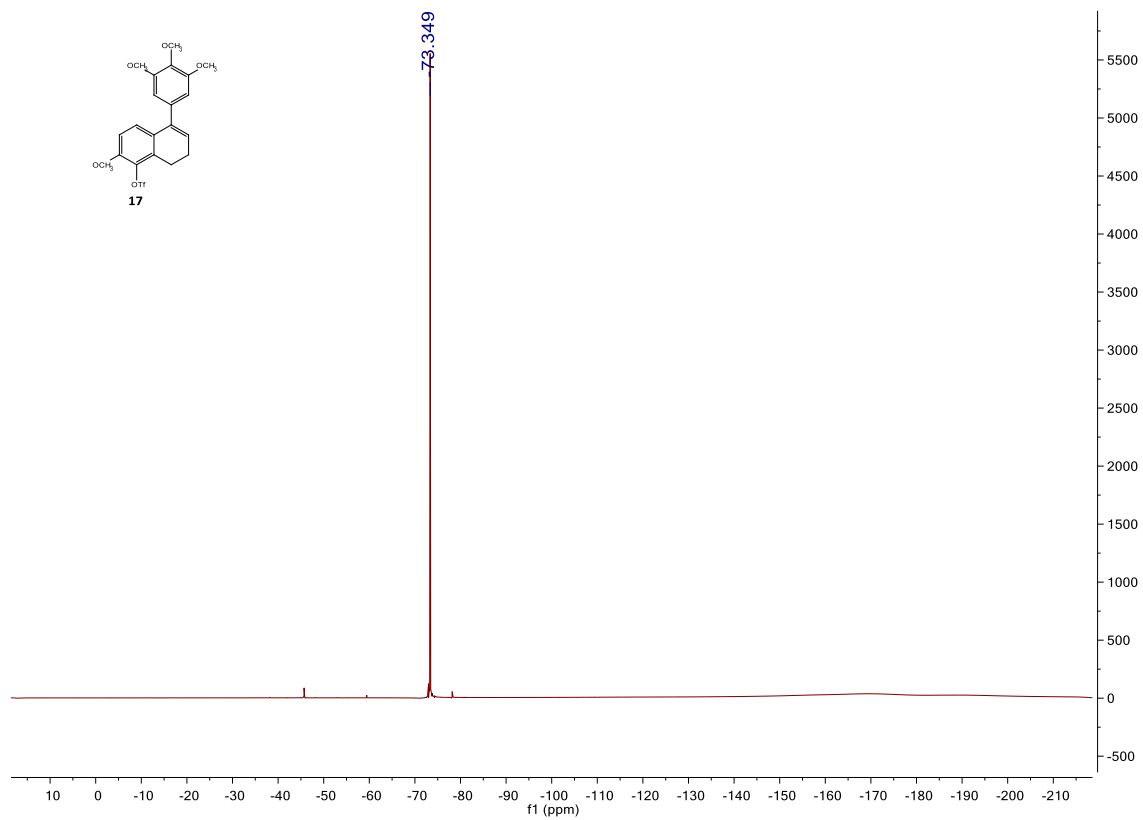

# 2-methoxy-5-(3,4,5-trimethoxyphenyl)-7,8-dihydronaphthalen-1-amine

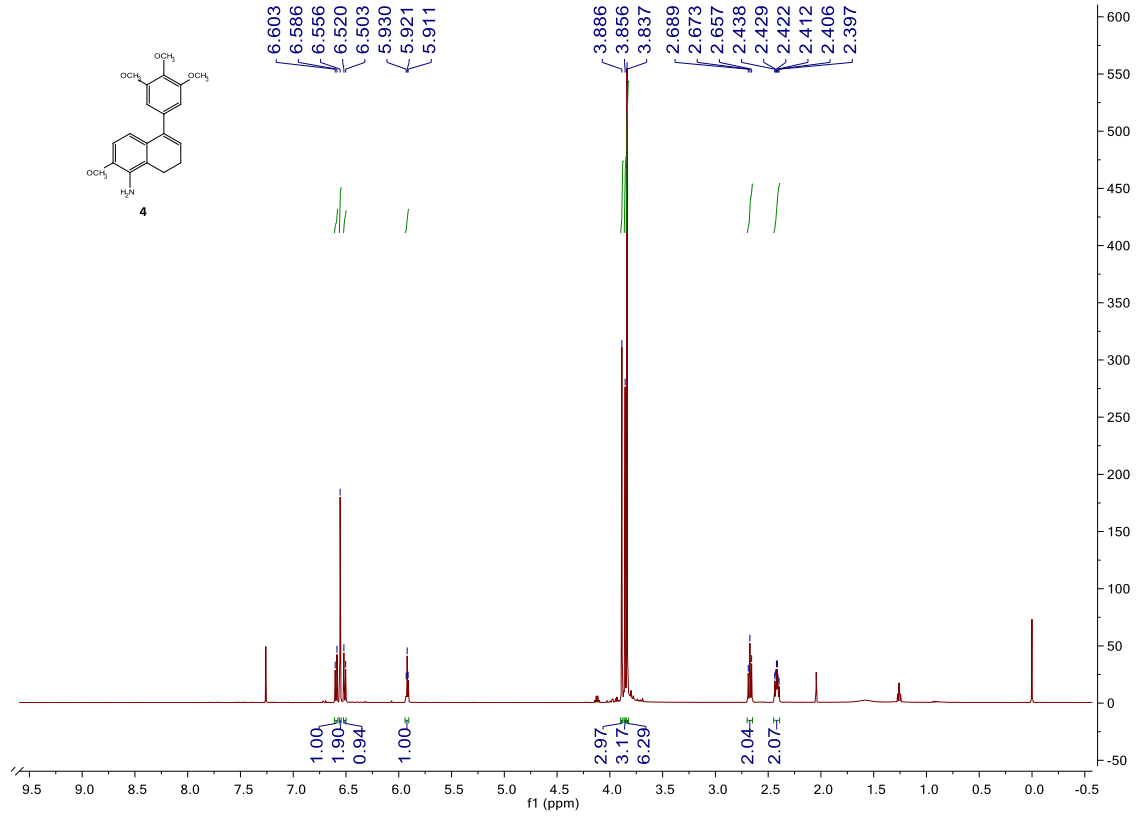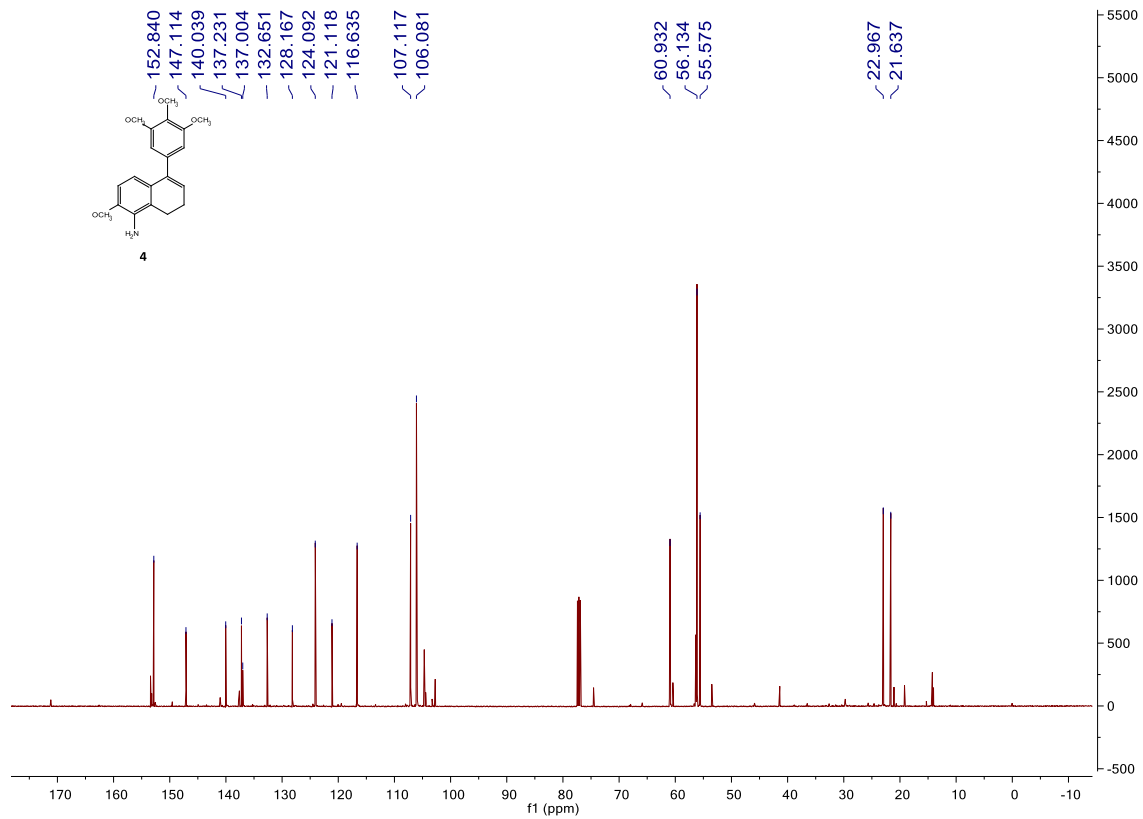

KGP05\_Pure\_+ESI#2-20 RT: 0.01-0.15 AV: 19 NL: 2.21E8  
T: FTMS + p ESI Full ms [200.00-1000.00]

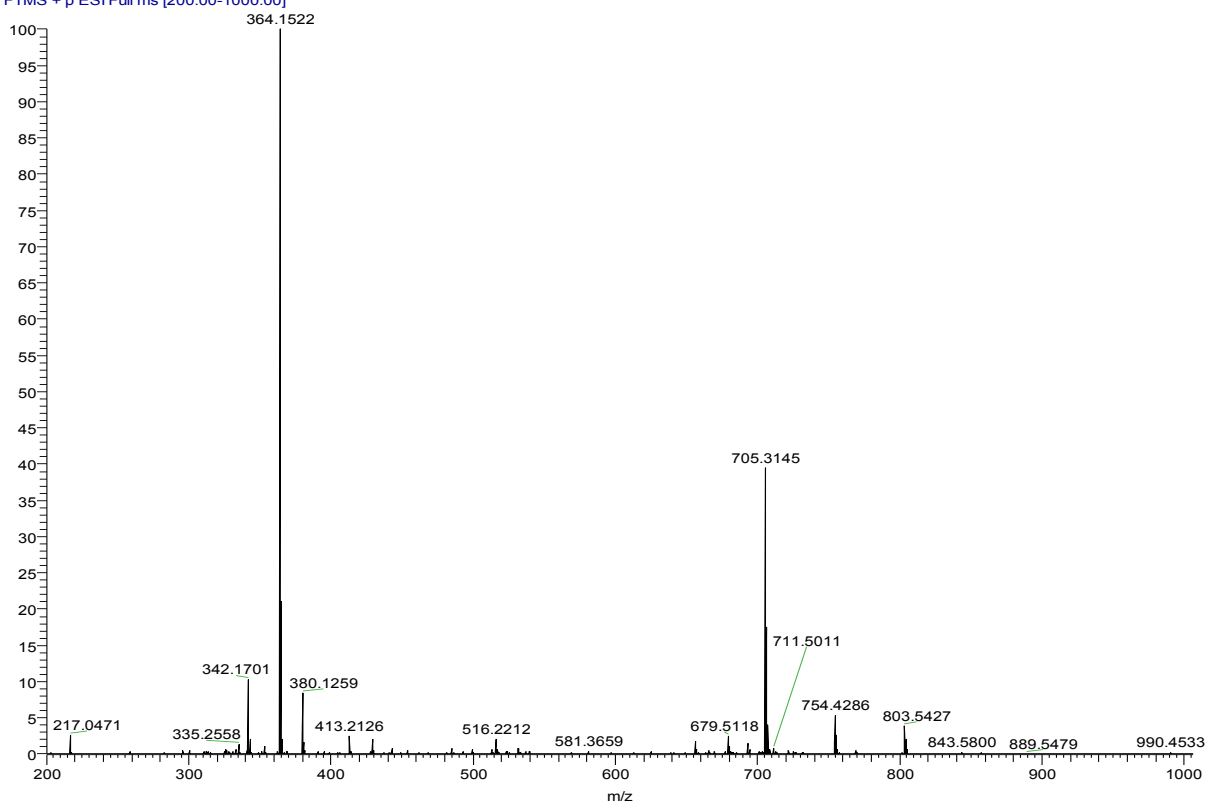





Data File C:\Chem32\1\Data\NHC\KGP05\_NewRoute.D  
Sample Name: KGP05\_NewRoute

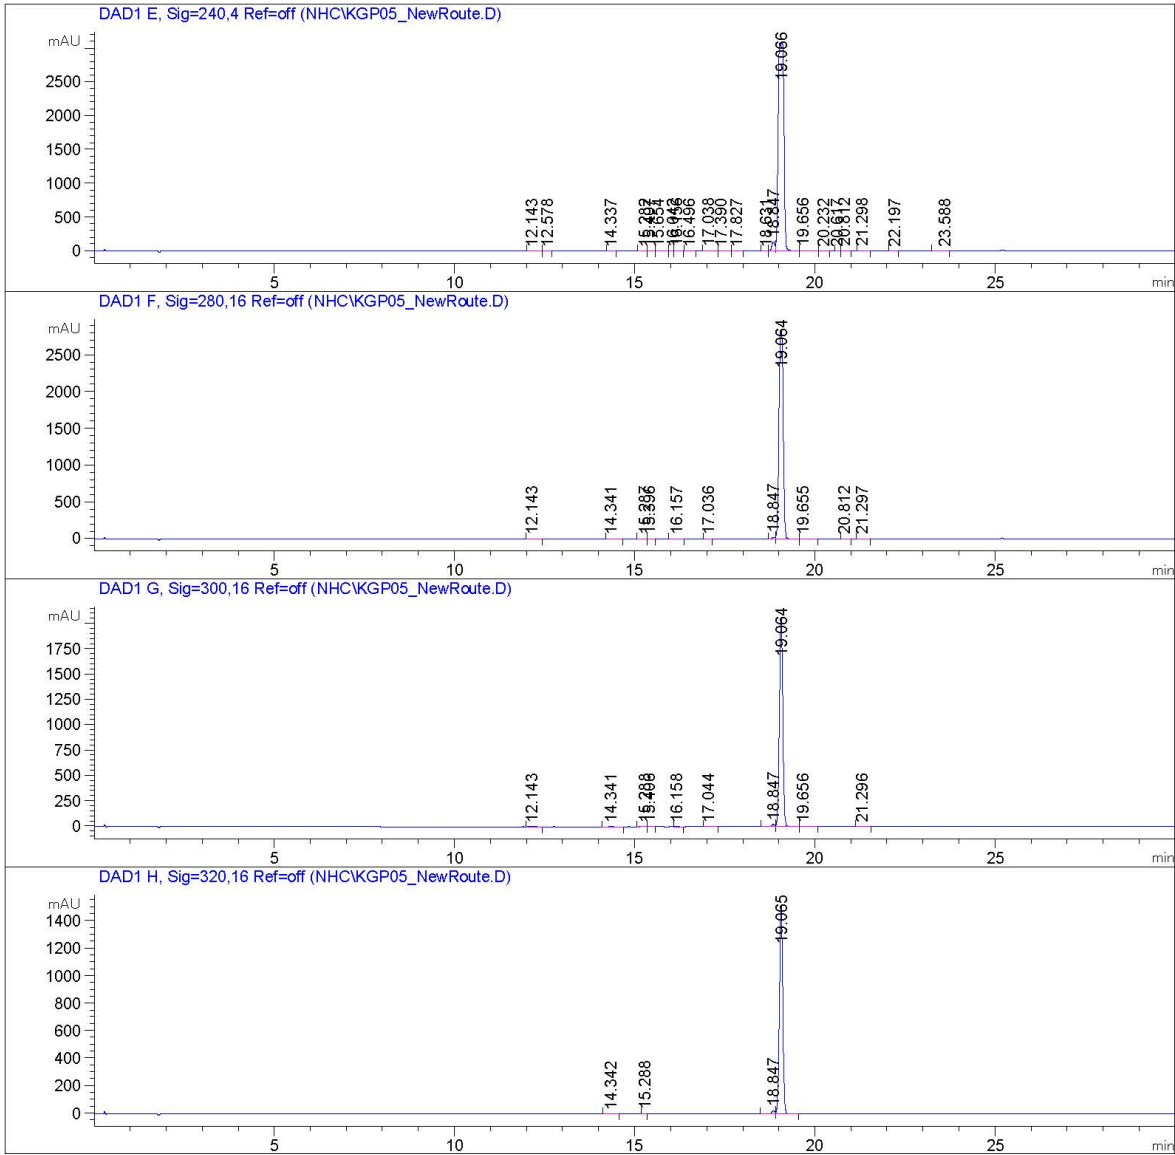

=====  
Area Percent Report  
=====

Sorted By : Signal  
Multiplier : 1.0000  
Dilution : 1.0000  
Use Multiplier & Dilution Factor with ISTDs

Data File C:\Chem32\1\Data\NHC\KGP05\_NewRoute.D  
Sample Name: KGP05\_NewRoute

Signal 1: DAD1 A, Sig=254,4 Ref=off

| Peak # | RetTime [min] | Type | Width [min] | Area [mAU*s] | Height [mAU] | Area %  |
|--------|---------------|------|-------------|--------------|--------------|---------|
| 1      | 12.144        | BB   | 0.1456      | 11.43589     | 1.26316      | 0.0407  |
| 2      | 14.341        | BB   | 0.0934      | 10.43205     | 1.75395      | 0.0371  |
| 3      | 15.287        | BV   | 0.0885      | 21.39037     | 3.53788      | 0.0760  |
| 4      | 15.394        | VB   | 0.1050      | 12.59640     | 1.90868      | 0.0448  |
| 5      | 16.046        | BV   | 0.0705      | 9.21967      | 1.97350      | 0.0328  |
| 6      | 16.156        | VB   | 0.0902      | 28.19130     | 4.68357      | 0.1002  |
| 7      | 16.497        | BV   | 0.1267      | 9.51598      | 1.10252      | 0.0338  |
| 8      | 17.037        | BB   | 0.1121      | 23.20277     | 3.07219      | 0.0825  |
| 9      | 17.544        | VB   | 0.1076      | 7.16592      | 1.00014      | 0.0255  |
| 10     | 17.828        | BB   | 0.0900      | 8.81138      | 1.46926      | 0.0313  |
| 11     | 18.630        | BV   | 0.0927      | 18.56085     | 3.15008      | 0.0660  |
| 12     | 18.847        | VV   | 0.0875      | 859.45300    | 153.07661    | 3.0555  |
| 13     | 19.066        | VV   | 0.1513      | 2.69622e4    | 2932.58545   | 95.8548 |
| 14     | 19.658        | VB   | 0.1475      | 50.49631     | 4.77099      | 0.1795  |
| 15     | 20.619        | BV   | 0.1211      | 14.90903     | 1.82944      | 0.0530  |
| 16     | 20.813        | VB   | 0.1103      | 24.79796     | 3.43096      | 0.0882  |
| 17     | 21.298        | BB   | 0.1054      | 33.80489     | 4.84669      | 0.1202  |
| 18     | 23.100        | BB   | 0.1118      | 7.52187      | 1.02297      | 0.0267  |
| 19     | 23.591        | BV   | 0.1596      | 14.44914     | 1.22530      | 0.0514  |

Totals : 2.81281e4 3127.70334

Signal 2: DAD1 B, Sig=254,16 Ref=off

| Peak # | RetTime [min] | Type | Width [min] | Area [mAU*s] | Height [mAU] | Area %  |
|--------|---------------|------|-------------|--------------|--------------|---------|
| 1      | 12.143        | BB   | 0.1473      | 11.92598     | 1.32108      | 0.0418  |
| 2      | 14.340        | BB   | 0.0962      | 11.70246     | 1.83920      | 0.0410  |
| 3      | 15.287        | BV   | 0.0896      | 20.99781     | 3.42119      | 0.0736  |
| 4      | 15.395        | VB   | 0.1063      | 13.13152     | 1.95703      | 0.0460  |
| 5      | 16.045        | BV   | 0.0734      | 9.74003      | 2.05064      | 0.0341  |
| 6      | 16.156        | VB   | 0.0901      | 27.60028     | 4.59181      | 0.0968  |
| 7      | 16.497        | BV   | 0.1270      | 9.36268      | 1.08142      | 0.0328  |
| 8      | 17.037        | BB   | 0.1116      | 23.83972     | 3.17631      | 0.0836  |
| 9      | 17.828        | BB   | 0.0897      | 8.39291      | 1.40479      | 0.0294  |
| 10     | 18.630        | BV   | 0.0929      | 18.01997     | 3.05347      | 0.0632  |
| 11     | 18.847        | VV   | 0.0874      | 788.60284    | 140.69543    | 2.7645  |
| 12     | 19.064        | VV   | 0.1522      | 2.74400e4    | 2959.95923   | 96.1916 |
| 13     | 19.658        | VB   | 0.1477      | 52.16078     | 4.91813      | 0.1829  |
| 14     | 20.619        | BV   | 0.1234      | 14.76134     | 1.76743      | 0.0517  |
| 15     | 20.813        | VB   | 0.1194      | 28.83435     | 3.60152      | 0.1011  |
| 16     | 21.298        | BB   | 0.1057      | 32.89208     | 4.69830      | 0.1153  |
| 17     | 23.591        | BV   | 0.1607      | 14.42984     | 1.21414      | 0.0506  |

Totals : 2.85264e4 3140.75114

Data File C:\Chem32\1\Data\NHC\KGP05\_NewRoute.D  
 Sample Name: KGP05\_NewRoute

Signal 3: DAD1 C, Sig=210,8 Ref=off

| Peak # | RetTime [min] | Type | Width [min] | Area [mAU*s] | Height [mAU] | Area %  |
|--------|---------------|------|-------------|--------------|--------------|---------|
| 1      | 7.996         | BB   | 0.1789      | 20.50076     | 1.60581      | 0.0581  |
| 2      | 10.815        | BB   | 0.1378      | 80.69191     | 9.43467      | 0.2287  |
| 3      | 11.876        | BV   | 0.1140      | 19.06164     | 2.36648      | 0.0540  |
| 4      | 12.140        | VB   | 0.1610      | 30.95048     | 3.03506      | 0.0877  |
| 5      | 12.577        | BV   | 0.0994      | 28.59613     | 4.42572      | 0.0810  |
| 6      | 14.339        | BB   | 0.0931      | 64.45770     | 10.57556     | 0.1827  |
| 7      | 14.828        | BV   | 0.1045      | 9.47881      | 1.44551      | 0.0269  |
| 8      | 14.992        | VB   | 0.0802      | 7.09835      | 1.33060      | 0.0201  |
| 9      | 15.286        | BV   | 0.0895      | 49.88937     | 7.91920      | 0.1414  |
| 10     | 15.386        | VB   | 0.1010      | 39.10905     | 5.92893      | 0.1108  |
| 11     | 15.752        | VB   | 0.0983      | 9.28196      | 1.34815      | 0.0263  |
| 12     | 16.039        | BV   | 0.0786      | 44.58123     | 8.58206      | 0.1263  |
| 13     | 16.156        | VB   | 0.0914      | 69.80530     | 11.73819     | 0.1978  |
| 14     | 16.492        | BV   | 0.1244      | 24.18276     | 2.86794      | 0.0685  |
| 15     | 16.784        | VB   | 0.0898      | 8.85806      | 1.52453      | 0.0251  |
| 16     | 17.035        | BB   | 0.1076      | 53.45822     | 7.46132      | 0.1515  |
| 17     | 17.383        | BV   | 0.0842      | 7.50770      | 1.32349      | 0.0213  |
| 18     | 17.536        | VB   | 0.1088      | 13.63358     | 1.83327      | 0.0386  |
| 19     | 17.827        | BB   | 0.0855      | 22.02780     | 3.92107      | 0.0624  |
| 20     | 18.629        | BB   | 0.0876      | 22.91023     | 4.20579      | 0.0649  |
| 21     | 18.847        | BV   | 0.0864      | 1410.23096   | 255.45058    | 3.9963  |
| 22     | 19.069        | VB   | 0.1914      | 3.28838e4    | 2832.92188   | 93.1865 |
| 23     | 19.655        | BB   | 0.1186      | 56.15527     | 6.92900      | 0.1591  |
| 24     | 20.211        | BV   | 0.1190      | 15.61918     | 2.09467      | 0.0443  |
| 25     | 20.329        | VB   | 0.0747      | 6.53818      | 1.39390      | 0.0185  |
| 26     | 20.620        | VV   | 0.1015      | 19.41312     | 2.92372      | 0.0550  |
| 27     | 20.812        | VB   | 0.1085      | 75.65466     | 10.69636     | 0.2144  |
| 28     | 21.292        | BB   | 0.1286      | 32.07181     | 3.57759      | 0.0909  |
| 29     | 21.663        | BV   | 0.0972      | 11.49804     | 1.78341      | 0.0326  |
| 30     | 21.805        | VV   | 0.1605      | 12.49424     | 1.03746      | 0.0354  |
| 31     | 22.198        | VB   | 0.1137      | 21.77303     | 2.83249      | 0.0617  |
| 32     | 22.519        | BB   | 0.1441      | 11.18503     | 1.05162      | 0.0317  |
| 33     | 22.987        | BV   | 0.0868      | 10.11540     | 1.76788      | 0.0287  |
| 34     | 23.095        | VB   | 0.0956      | 11.63191     | 1.84484      | 0.0330  |
| 35     | 23.409        | BV   | 0.1091      | 7.58604      | 1.04029      | 0.0215  |
| 36     | 23.587        | VV   | 0.1210      | 27.26513     | 3.27857      | 0.0773  |
| 37     | 23.839        | VV   | 0.1833      | 33.10796     | 2.45590      | 0.0938  |
| 38     | 24.345        | VB   | 0.1378      | 15.94666     | 1.66357      | 0.0452  |

Totals : 3.52881e4 3227.61707

Signal 4: DAD1 D, Sig=230,16 Ref=off

| Peak # | RetTime [min] | Type | Width [min] | Area [mAU*s] | Height [mAU] | Area % |
|--------|---------------|------|-------------|--------------|--------------|--------|
| 1      | 10.815        | BB   | 0.1322      | 17.49115     | 2.12184      | 0.0501 |
| 2      | 12.143        | VB   | 0.1618      | 34.99557     | 3.40943      | 0.1002 |
| 3      | 12.578        | BB   | 0.0924      | 8.26647      | 1.36915      | 0.0237 |

Data File C:\Chem32\1\Data\NHC\KGP05\_NewRoute.D  
 Sample Name: KGP05\_NewRoute

| Peak # | RetTime [min] | Type | Width [min] | Area [mAU*s] | Height [mAU] | Area %  |
|--------|---------------|------|-------------|--------------|--------------|---------|
| 4      | 14.340        | BB   | 0.0933      | 32.15208     | 5.26187      | 0.0921  |
| 5      | 15.284        | BV   | 0.0996      | 31.51141     | 4.39869      | 0.0902  |
| 6      | 15.402        | VB   | 0.1169      | 29.66775     | 3.98250      | 0.0850  |
| 7      | 16.041        | BV   | 0.0767      | 24.80235     | 4.92773      | 0.0710  |
| 8      | 16.156        | VB   | 0.0918      | 49.38046     | 8.25542      | 0.1414  |
| 9      | 16.494        | BB   | 0.0990      | 11.40789     | 1.82433      | 0.0327  |
| 10     | 17.038        | BV   | 0.1062      | 46.27760     | 6.41281      | 0.1325  |
| 11     | 17.511        | VB   | 0.2209      | 19.82826     | 1.27894      | 0.0568  |
| 12     | 17.827        | BB   | 0.0888      | 8.86393      | 1.50347      | 0.0254  |
| 13     | 18.630        | BB   | 0.0878      | 17.55673     | 3.21131      | 0.0503  |
| 14     | 18.847        | BV   | 0.0854      | 835.78552    | 153.77007    | 2.3937  |
| 15     | 19.065        | VV   | 0.1816      | 3.34704e4    | 3012.69092   | 95.8599 |
| 16     | 19.655        | VV   | 0.1208      | 65.31109     | 7.87023      | 0.1871  |
| 17     | 19.815        | VB   | 0.1162      | 27.41306     | 3.39404      | 0.0785  |
| 18     | 20.234        | BB   | 0.1351      | 26.04231     | 2.94681      | 0.0746  |
| 19     | 20.617        | VV   | 0.0984      | 12.42971     | 1.89863      | 0.0356  |
| 20     | 20.811        | VB   | 0.1065      | 38.75175     | 5.61653      | 0.1110  |
| 21     | 21.297        | BB   | 0.1256      | 40.54931     | 4.65598      | 0.1161  |
| 22     | 21.664        | BV   | 0.0925      | 7.74135      | 1.28087      | 0.0222  |
| 23     | 21.814        | VB   | 0.1090      | 7.54903      | 1.03594      | 0.0216  |
| 24     | 22.198        | BB   | 0.0971      | 10.70251     | 1.70707      | 0.0307  |
| 25     | 23.097        | BB   | 0.1351      | 10.33754     | 1.08587      | 0.0296  |
| 26     | 23.588        | BV   | 0.1476      | 21.00341     | 1.98295      | 0.0602  |
| 27     | 24.346        | BB   | 0.1324      | 9.74102      | 1.06806      | 0.0279  |

Totals : 3.49160e4 3248.96144

Signal 5: DAD1 E, Sig=240,4 Ref=off

| Peak # | RetTime [min] | Type | Width [min] | Area [mAU*s] | Height [mAU] | Area %  |
|--------|---------------|------|-------------|--------------|--------------|---------|
| 1      | 12.143        | VB   | 0.1620      | 29.70107     | 2.88745      | 0.0873  |
| 2      | 12.578        | BV   | 0.0947      | 6.29699      | 1.01039      | 0.0185  |
| 3      | 14.337        | BB   | 0.0949      | 9.40256      | 1.54804      | 0.0276  |
| 4      | 15.282        | BV   | 0.1071      | 22.32708     | 2.86076      | 0.0656  |
| 5      | 15.407        | VB   | 0.1181      | 21.85952     | 2.89563      | 0.0643  |
| 6      | 15.654        | BB   | 0.1347      | 10.17704     | 1.03514      | 0.0299  |
| 7      | 16.042        | BV   | 0.0790      | 17.95292     | 3.54973      | 0.0528  |
| 8      | 16.156        | VB   | 0.0920      | 32.44355     | 5.41095      | 0.0954  |
| 9      | 16.496        | BV   | 0.1284      | 11.59169     | 1.32064      | 0.0341  |
| 10     | 17.038        | BV   | 0.1073      | 37.76653     | 5.16427      | 0.1110  |
| 11     | 17.390        | VB   | 0.1910      | 17.01636     | 1.14761      | 0.0500  |
| 12     | 17.827        | BB   | 0.0892      | 6.73428      | 1.13587      | 0.0198  |
| 13     | 18.631        | BB   | 0.0873      | 16.19819     | 2.98691      | 0.0476  |
| 14     | 18.847        | BV   | 0.0856      | 761.83679    | 139.77220    | 2.2395  |
| 15     | 19.066        | VV   | 0.1739      | 3.28191e4    | 3091.19092   | 96.4752 |
| 16     | 19.656        | VB   | 0.1552      | 79.47507     | 7.06691      | 0.2336  |
| 17     | 20.232        | BB   | 0.1443      | 18.28837     | 1.89934      | 0.0538  |
| 18     | 20.617        | VV   | 0.0982      | 9.57039      | 1.46446      | 0.0281  |
| 19     | 20.812        | VB   | 0.1064      | 34.06365     | 4.94172      | 0.1001  |
| 20     | 21.298        | BB   | 0.1153      | 37.82603     | 4.83226      | 0.1112  |

Data File C:\Chem32\1\Data\NHC\KGP05\_NewRoute.D  
Sample Name: KGP05\_NewRoute

| Peak # | RetTime [min] | Type | Width [min] | Area [mAU*s] | Height [mAU] | Area % |
|--------|---------------|------|-------------|--------------|--------------|--------|
| 21     | 22.197        | BB   | 0.0993      | 7.62234      | 1.21290      | 0.0224 |
| 22     | 23.588        | BB   | 0.1314      | 10.93429     | 1.18751      | 0.0321 |

Totals : 3.40182e4 3286.52160

Signal 6: DAD1 F, Sig=280,16 Ref=off

| Peak # | RetTime [min] | Type | Width [min] | Area [mAU*s] | Height [mAU] | Area %  |
|--------|---------------|------|-------------|--------------|--------------|---------|
| 1      | 12.143        | BB   | 0.1510      | 14.55555     | 1.55749      | 0.0639  |
| 2      | 14.341        | BB   | 0.0907      | 23.32549     | 3.95847      | 0.1024  |
| 3      | 15.287        | BV   | 0.0912      | 20.25547     | 3.22794      | 0.0889  |
| 4      | 15.396        | VB   | 0.1091      | 14.11893     | 2.03223      | 0.0620  |
| 5      | 16.157        | BB   | 0.1109      | 24.37087     | 3.19886      | 0.1070  |
| 6      | 17.036        | BB   | 0.0927      | 11.58850     | 1.96765      | 0.0509  |
| 7      | 18.847        | BV   | 0.0825      | 147.43117    | 27.53336     | 0.6472  |
| 8      | 19.064        | VV   | 0.1280      | 2.24666e4    | 2848.95654   | 98.6314 |
| 9      | 19.655        | VB   | 0.1484      | 29.81342     | 2.79708      | 0.1309  |
| 10     | 20.812        | VB   | 0.1156      | 12.89520     | 1.71737      | 0.0566  |
| 11     | 21.297        | BB   | 0.1081      | 13.38892     | 1.85670      | 0.0588  |

Totals : 2.27784e4 2898.80370

Signal 7: DAD1 G, Sig=300,16 Ref=off

| Peak # | RetTime [min] | Type | Width [min] | Area [mAU*s] | Height [mAU] | Area %  |
|--------|---------------|------|-------------|--------------|--------------|---------|
| 1      | 12.143        | BB   | 0.1519      | 16.23135     | 1.72349      | 0.1208  |
| 2      | 14.341        | BB   | 0.0925      | 16.34811     | 2.70358      | 0.1216  |
| 3      | 15.288        | BV   | 0.0894      | 17.85512     | 2.91646      | 0.1328  |
| 4      | 15.406        | VB   | 0.1166      | 16.62880     | 2.23992      | 0.1237  |
| 5      | 16.158        | VB   | 0.0944      | 7.35675      | 1.18523      | 0.0547  |
| 6      | 17.044        | BB   | 0.1317      | 9.73999      | 1.03621      | 0.0725  |
| 7      | 18.847        | BV   | 0.0868      | 110.88705    | 19.97747     | 0.8250  |
| 8      | 19.064        | VV   | 0.1007      | 1.32208e4    | 2065.10962   | 98.3655 |
| 9      | 19.656        | VB   | 0.1580      | 15.93034     | 1.36678      | 0.1185  |
| 10     | 21.296        | BB   | 0.1127      | 8.71391      | 1.14643      | 0.0648  |

Totals : 1.34405e4 2099.40518

Signal 8: DAD1 H, Sig=320,16 Ref=off

Data File C:\Chem32\1\Data\NHC\KGP05\_NewRoute.D

Sample Name: KGP05\_NewRoute

| Peak # | RetTime [min] | Type | Width [min] | Area [mAU*s] | Height [mAU] | Area %  |
|--------|---------------|------|-------------|--------------|--------------|---------|
| 1      | 14.342        | BB   | 0.0916      | 6.79143      | 1.13817      | 0.0700  |
| 2      | 15.288        | BB   | 0.0668      | 5.60983      | 1.34069      | 0.0579  |
| 3      | 18.847        | BV   | 0.0881      | 143.93456    | 25.39465     | 1.4846  |
| 4      | 19.065        | VV   | 0.0972      | 9539.15430   | 1519.85461   | 98.3875 |

Totals :                    9695.49011 1547.72812

=====  
\*\*\* End of Report \*\*\*

### Scale-up Experimental Section:

**2-Isopropoxy-3-methoxybenzaldehyde (6, DM 08/24/2016 P77).** A homogeneous mixture of 2-hydroxy-3-methoxybenzaldehyde (14.7 g, 96.6 mmol) and K<sub>2</sub>CO<sub>3</sub> (20.0 g, 145 mmol) in DMF (193 mL) was stirred at room temperature for 30 min. 2-Iodopropane (19.3 mL, 193 mmol) was added and the reaction mixture was stirred at 50 °C for 20 h, subsequently returned to room temperature, and diluted with EtOAc and water. The organic layer was separated, and the aqueous layer was washed two more times with EtOAc. The combined organic layer was washed twice with brine and dried over anhydrous sodium sulfate. Purification by flash chromatography (Biotage Isolera, silica gel column using 0-5% EtOAc-hexane) afforded aldehyde **6** (17.7 g, 91.1 mmol, 95%) as an oily liquid.

**5-(2-Isopropoxy-3-methoxyphenyl)pentanoic acid (7, DM21541, 06/16/2016).** To an ice-cold solution of potassium *tert*-butoxide (12.13 g, 108.1 mmol) in DMF (154.0 mL), 3-carboxypropyltriphenylphosphonium bromide (19.89 g, 46.34 mmol) was added and the reaction mixture was stirred for 10 min. A DMF (10.0 mL) solution of aldehyde **6** (6.00 g, 30.9 mmol) was added to the generated ylide, and the reaction mixture was stirred at room temperature for 20 h, followed by the addition of deionized (DI) water to obtain a clear solution. DMF and water were removed under reduced pressure and the crude residue was taken up in EtOAc and water to which the aqueous layer was acidified (pH ~ 1-2) with HCl (2 M). The organic layer was separated, and the aqueous layer was washed twice with EtOAc. The combined organic layer was dried over sodium sulfate, filtered [round bottom flask (250.0 mL)], and concentrated under reduced pressure to obtain the crude intermediate alkene (both *E* and *Z*) as an oil. The mixture of alkene geometrical isomers was dissolved in CH<sub>3</sub>OH (61.6 mL) followed by the slow and careful addition of Pd-C (10 wt%, 1.643 g, 1.544 mmol) under nitrogen to avoid the risk of fire. The



resultant heterogeneous mixture was stirred under a hydrogen atmosphere (balloon filled with hydrogen) at room temperature for 24 h. Pd/C was filtered by passage through a Celite<sup>®</sup> bed. The filtrate was collected and the solvent was removed under reduced pressure to obtain an oily liquid. Purification by flash chromatography (Biotage Isolera, silica gel column 0-25% EtOAc-hexane) afforded carboxylic acid **7** (7.80 g, 29.3 mmol, 95%) as an oily liquid.

**1-Isopropoxy-2-methoxy-6,7,8,9-tetrahydro-5H-benzo[7]annulen-5-one (8, DM 02/14/2017 P26).** To a solution of carboxylic acid **7** (8.17 g, 30.7 mmol) and oxalyl chloride (5.20 mL, 61.4 mmol) in CH<sub>2</sub>Cl<sub>2</sub> (30.0 mL), DMF (236 μL, 0.307 mmol) was added dropwise. The reaction mixture was stirred for 2 h at room temperature. Excess oxalyl chloride was removed under reduced pressure (rotary evaporation) and trace amounts of remaining oxalyl chloride were removed by repeated evaporation with toluene. The crude acyl chloride solution in CH<sub>2</sub>Cl<sub>2</sub> (306 mL) was cooled (ice bath) and SnCl<sub>4</sub> (1 M in CH<sub>2</sub>Cl<sub>2</sub>, 36.8 mL, 36.8 mmol). The reaction mixture was stirred for 30 min at -10 °C, and subsequently quenched with DI water, followed by the addition of HCl (1 M) to dissolve the white emulsion. The organic layer was separated, and the aqueous layer was washed twice with dichloromethane. The combined organic layer was dried over anhydrous sodium sulfate, filtered, and concentrated under reduced pressure to generate a crude oily liquid. Purification by flash chromatography (Biotage Isolera, silica gel column using 0-10% EtOAc-hexane) afforded ketone **8** (5.10 g, 20.5 mmol, 67%) as an oily liquid.

**4-Isopropoxy-3-methoxy-9-(3,4,5-trimethoxyphenyl)-6,7-dihydro-5H-benzo[7]annulene (9, DM 08/17/2016 P72).** A solution of 1, 2, 3-trimethoxy-5-bromobenzene (10.5 g, 42.7 mmol) in

THF (213 mL) was cooled to -78 °C, followed by the addition of *n*-BuLi (2.5 M in hexane, 17.1 mL, 42.7 mmol). The reaction mixture was stirred for 30 min. A solution of ketone **8** (5.30 g, 21.3 mmol) in THF (10 mL) was added (via cannula) to the generated organometallic reagent. The reaction mixture was stirred at -78 °C for 5 h and subsequently stirred at room temperature for an additional 15 h. The reaction mixture was diluted with EtOAc, quenched with water, and the aqueous solution was adjusted to slightly acidic (pH ~ 3-4) with HCl (2 M). The organic layer was separated, and the aqueous layer was further washed twice with EtOAc. The combined organic layer was dried over anhydrous sodium sulfate, filtered, and concentrated under reduced pressure to yield a crude oily liquid. Purification by flash chromatography (Biotage Isolera, silica gel column using 0-10% EtOAc-hexane) afforded compound **9** (7.17 g, 18.0 mmol, 84%) as a white solid.

**3-Methoxy-9-(3,4,5-trimethoxyphenyl)-6,7-dihydro-5H-benzo[7]annulen-4-ol (1, DM 08/22/2016 P74, KGP18).** To an ice-cold solution of compound **9** (7.15 g, 17.9 mmol) in CH<sub>2</sub>Cl<sub>2</sub> (89.5 mL), was added (slowly) boron trichloride (1 M in CH<sub>2</sub>Cl<sub>2</sub>, 19.7 mL, 19.7 mmol). After stirring for 4 h at 0 °C, the reaction mixture was quenched with DI water and further acidified (2 M HCl) to obtain clear phases. The organic layer was separated, and the aqueous layer was further washed twice with dichloromethane. The combined organic layer was dried over anhydrous sodium sulfate, filtered, and concentrated under reduced pressure to obtain a crude white solid. Purification by flash chromatography (Biotage Isolera, silica gel column using 0-15% EtOAc-hexane) afforded phenol **1** (5.50 g, 15.4 mmol, 86%) as a white solid.

**3-Methoxy-9-(3,4,5-trimethoxyphenyl)-6,7-dihydro-5H-benzo[7]annulen-4-yl**

**trifluoromethanesulfonate (10, DM 08/25/2016 P78).** To an ice-cold solution of phenol **1** (2.4 g, 6.7 mmol) and DMAP (82 mg, 0.67 mmol) in CH<sub>2</sub>Cl<sub>2</sub> (67.3 mL), was added triethylamine (TEA) (1.0 mL, 7.4 mmol) and the reaction mixture was stirred for 15 min. Triflic anhydride (2.2 mL, 13 mmol) was added slowly and the reaction mixture was stirred at room temperature for 18 h, and subsequently quenched with water. The organic layer was separated, and the aqueous layer was washed twice with CH<sub>2</sub>Cl<sub>2</sub>. The combined organic layer was dried over anhydrous sodium sulfate, filtered, and concentrated under reduced pressure to obtain a crude white solid. Purification by flash chromatography (Biotage Isolera, silica gel column using 0-10% EtOAc-hexane) afforded triflate **10** (2.54 g, 5.20 mmol, 77%) as a white solid.

**3-Methoxy-9-(3,4,5-trimethoxyphenyl)-6,7-dihydro-5H-benzo[7]annulen-4-amine (2, DM 08/29/2016 P79, KGP156).** A solution of triflate **10** (1.74 g, 3.56 mmol), Pd(OAc)<sub>2</sub> (80 mg, 0.36 mmol), BINAP (332 mg, 0.534 mmol), benzophenone imine (896 μL, 5.34 mmol), and Cs<sub>2</sub>CO<sub>3</sub> (1.74 g, 5.34 mmol) in toluene (14 mL) was degassed by bubbling nitrogen through the solution for 15 min in a sealed tube with a needle outlet. The reaction mixture was heated at 110 °C for 36 h, and subsequently returned to room temperature, diluted with EtOAc, and quenched with water. The organic layer was separated, and the aqueous layer was washed further twice with EtOAc. The solution was collected in a round bottom flask and solvent was evaporated to yield crude intermediate imine compound. The crude imine was dissolved in THF (35.0 mL) and treated with aqueous 2 M HCl to maintain pH ~ 1-2 and stirred at room temperature for 3 h. The solvent (THF) was removed under reduced pressure, and EtOAc and NaHCO<sub>3</sub> (saturated aqueous solution to neutralize the acid) were added to the residue. The organic layer was separated, and the aqueous layer was washed twice with EtOAc. The combined organic layer

was dried over anhydrous sodium sulfate, filtered, and concentrated under reduced pressure to yield a crude solid. Purification by flash chromatography (Biotage Isolera, silica gel column using 5-20% EtOAc-hexane) afforded amine **2** (1.00 g, 2.81 mmol, 79% as a slightly greenish-white crystalline solid).

**(3-Hydroxypropyl)triphenylphosphonium bromide (12, DM 05/17/2017 P66).** A solution of 3-bromo-1-propanol (14.0 mL, 155 mmol) and triphenylphosphine (20.3 g, 77.4 mmol) in toluene (77.4 mL) was heated at reflux for 24 h. Toluene was removed under vacuum. To the solid residue, diethyl ether was added and resultant solution was sonicated to dissolve trace amounts of triphenylphosphine. The diethyl ether layer was decanted. This step was repeated twice and the white solid was dried under vacuum to afford highly pure bromide **12** (28.1 g, 70.0 mmol, 90%) as a white solid.

**4-(2-Isopropoxy-3-methoxyphenyl)butan-1-ol (13, DM 02/06/2017 P22).** To an ice-cold suspension of Wittig salt **12** (13.1 g, 32.7 mmol) in THF (374 mL) was slowly added *n*-BuLi (2.5 M in hexane, 26.1 mL, 65.4 mmol). The reaction mixture was stirred for 15 min at which point the suspension dissolved to reveal a bright orange colored solution. To this solution was added TMSCl (4.10 mL, 32.7 mmol) and the resultant reaction mixture was stirred for an additional 30 min. Subsequently, a solution of aldehyde **6** [4.23 g, 21.8 mmol in THF (10.0 mL)] was added to the generated ylide. The reaction mixture was stirred at 0 °C for 1 h and subsequently at room temperature for 1 h. The solvent (THF) was removed under reduced pressure to afford a concentrated crude reaction mixture, which was diluted with EtOAc and quenched with HCl (2 M to maintain pH 1-2). The biphasic solution was stirred for 15 min to obtain a clear solution.

The organic layer was then separated and the aqueous layer was washed twice with EtOAc. The combined organic layer was dried over sodium sulfate, filtered, and concentrated under reduced pressure. The resultant crude product was dissolved in CH<sub>3</sub>OH (43.4 mL), and stirred under a hydrogen atmosphere (via balloon) in the presence of Pd/C [10 wt% (2.32 g, 2.20 mmol)] at room temperature for 24 h. The Pd/C was removed by Celite<sup>®</sup> filtration. The solvent (CH<sub>3</sub>OH) was removed under reduced pressure to afford the crude intermediate, which was subsequently dissolved in THF (43.4 mL) and treated with TBAF (1 M in THF, 32.7 mL, 32.7 mmol). The reaction mixture was stirred for 1 h, and subsequently quenched with aqueous 2 M HCl (12 mL). The solvent (THF) was removed under reduced pressure, and the crude product was diluted with EtOAc and water was added. The biphasic solution was stirred for 15 min. The organic layer was separated, and the aqueous layer was washed twice with EtOAc. The combined organic layer was dried over anhydrous sodium sulfate, filtered, and concentrated under reduced pressure to afford the product as a crude liquid. Purification by flash chromatography (Biotage Isolera, silica gel column using 5-30% EtOAc-hexane) afforded alcohol **13** (4.78 g, 20.1 mmol, 92%) as an oily liquid.

**4-(2-Isopropoxy-3-methoxyphenyl)butanoic acid (14, NHC\_5\_138).** To a solution of alcohol **13** (2.47 g, 10.4 mmol) dissolved in water/acetonitrile (150 mL/300 mL) was added Oxone<sup>®</sup> (9.55 g, 15.5 mmol) and 2-Iodoxybenzoic acid (IBX) (0.87 g, 3.1 mmol). The reaction mixture was stirred at 70 °C for 20 h, and the solvent was removed under reduced pressure. The residue was washed with 2 M HCl (100 mL) and extracted with EtOAc (3 x 50 mL). The combined organic phase was dried over sodium sulfate and evaporated under reduced pressure. The crude product was purified by flash chromatography using a pre-packed 100 g silica column [solvent

A: EtOAc; solvent B: hexanes; gradient: 12%A / 88%B (1 CV), 12%A / 88%B → 50%A / 50%B (10 CV), 50%A / 50%B (2 CV); flow rate: 100 mL/min; monitored at 254 and 280 nm] to afford carboxylic acid **14** (1.85 g, 7.38 mmol, 71%) as a brown oil.

**5-Isopropoxy-6-methoxy-3,4-dihydronaphthalen-1(2H)-one (15, DM 03/10/2017 P45).** To a solution of carboxylic acid **14** (2.85 g, 11.3 mmol) and oxalyl chloride (1.9 mL, 23 mmol) in CH<sub>2</sub>Cl<sub>2</sub> (22.4 mL), DMF (87 μL, 1.1 mmol) was added dropwise. The reaction mixture was stirred for 2 h. Excess oxalyl chloride (and solvent CH<sub>2</sub>Cl<sub>2</sub>) was removed under vacuum. Remaining trace amounts of oxalyl chloride was removed by repeated evaporation with toluene. The resulting acyl chloride was dissolved in CH<sub>2</sub>Cl<sub>2</sub> (112 mL), cooled to 0 °C, and SnCl<sub>4</sub> (1 M in CH<sub>2</sub>Cl<sub>2</sub>, 13.5 mL, 13.5 mmol) was added. After stirring for 30 min, the reaction was quenched with DI water, and HCl aqueous (2 M) was added to dissolve the white emulsion. The organic layer was separated, and the aqueous layer was washed twice with CH<sub>2</sub>Cl<sub>2</sub>. The combined organic layer was dried over anhydrous sodium sulfate, filtered, and concentrated under reduced pressure to obtain a crude liquid. Purification by flash chromatography (Biotage Isolera, silica gel column using 5-10% EtOAc-hexane) afforded ketone **15** (2.25 g, 9.6 mmol, 84%).

**8-Isopropoxy-7-methoxy-4-(3,4,5-trimethoxyphenyl)-1,2-dihydronaphthalene (16, DM 03/14/2017 P47).** A solution of 1, 2, 3-trimethoxy-5-bromobenzene (6.54 g, 26.5 mmol) in THF (101 mL) was cooled to -78 °C followed by the slow addition of *n*-BuLi (2.5 M in hexane, 10.6 mL, 26.5 mmol). After stirring for 30 min, a solution of ketone **15** (3.10 g, 13.2 mmol) in THF (5.0 mL) was added (via cannula) to the generated organolithium reagent. The reaction mixture was stirred at cold for 5 h and stirred at room temperature for 15 h. The reaction mixture was

diluted with EtOAc, quenched with DI water, and the aqueous solution was acidified (pH ~ 1-2) with HCl aqueous 2 M) and stirred for 1 h. The organic layer was separated, and the aqueous layer was washed twice with EtOAc. The combined organic layer was dried over anhydrous sodium sulfate, filtered, and concentrated under reduced pressure to obtain a crude liquid. Purification by flash chromatography (Biotage Isolera, silica gel column using 2-15% EtOAc-hexane) afforded compound **16** (3.30 g, 8.58 mmol, 65%) as a viscous liquid.

**2-Methoxy-5-(3,4,5-trimethoxyphenyl)-7,8-dihydronaphthalen-1-ol (3, DM 03/17/2017 P48, Oxi6196).** A solution of compound **16** (3.10 g, 8.06 mmol) in CH<sub>2</sub>Cl<sub>2</sub> (80 mL) was cooled (ice-bath) and BCl<sub>3</sub> (1 M in CH<sub>2</sub>Cl<sub>2</sub>, 8.87 mL, 8.87 mmol) was added slowly over a 30 min period. The reaction mixture was stirred for 3 h at 0 °C and for an additional 3 h at room temperature. The reaction was quenched with DI water and further acidified with aqueous 2 M HCl (pH ~ 1-2). The organic layer was separated, and the aqueous layer was washed twice with CH<sub>2</sub>Cl<sub>2</sub>. Purification by flash chromatography (Biotage Isolera, silica gel column using 5-15% EtOAc-hexane) afforded phenol **3** (2.30 g, 6.72 mmol, 83%) as a white solid.

**2-Methoxy-5-(3,4,5-trimethoxyphenyl)-7,8-dihydronaphthalen-1-yl**

**trifluoromethanesulfonate (17, DM 03/23/2017 P50).** To a solution of phenol **3** (1.00 g, 2.92 mmol) in CH<sub>2</sub>Cl<sub>2</sub> (29 mL), trimethylamine (615 μL, 4.38 mmol) was added and resultant reaction mixture was stirred for 15 min at room temperature, followed by the addition of triflic anhydride (736 μL, 4.38 mmol). After stirring at room temperature for 6 h, the reaction was quenched with DI water and neutralized by a saturated NaHCO<sub>3</sub> solution. The organic layer was separated and aqueous layer was washed twice with CH<sub>2</sub>Cl<sub>2</sub>. The combined organic layer was

dried over sodium sulfate, filtered, and concentrated under reduced pressure. Purification by flash chromatography (Biotage Isolera, silica gel column using 5-10% EtOAc-hexane) afforded triflic compound **17** (1.15 g, 2.42 mmol, 83%) as a white solid.

**2-Methoxy-5-(3,4,5-trimethoxyphenyl)-7,8-dihydronaphthalen-1-amine (4, DM 03/29/2017 KGP05).** To toluene (20 mL) in a pressure vial (sealed tube) was added triflate **17** (0.96 g, 2.0 mmol), Pd(OAc)<sub>2</sub> (45 mg, 0.20 mmol), *rac*-BINAP (0.19 g, 0.30 mmol), benzophenone imine (0.51 mL), and Cs<sub>2</sub>CO<sub>3</sub> (989 mg, 3.04 mmol). The solution was degassed (bubbling nitrogen) for 15 min. After heating at 110 °C for 36 h, the reaction mixture was cooled to room temperature, diluted with EtOAc, and quenched with DI water. The organic layer was separated, and the aqueous layer was washed further twice with EtOAc. The combined organic layer was dried over anhydrous sodium sulfate, filtered, and concentrated under reduced pressure. The crude product was dissolved in THF (20 mL) and treated with aqueous 2 M HCl until pH 2-3 was achieved, followed by stirring for 6 h. The solvent (THF) was removed under reduced pressure, and to the residue, EtOAc and a saturated aqueous NaHCO<sub>3</sub> solution was added to neutralize the acid. The organic layer was separated, and the aqueous layer was washed twice with EtOAc. The combined organic layer was dried over anhydrous sodium sulfate, filtered, and concentrated under reduced pressure. Purification by flash chromatography (Biotage Isolera, silica gel column using 5-20% EtOAc-hexane) afforded amine **4** (500 mg, 1.46 mmol, 72%) as a white crystalline solid.



References (for Supplementary Data):

- (1) Sriram, M.; Hall, J. J.; Grohmann, N. C.; Strecker, T. E.; Wootton, T.; Franken, A.; Trawick, M. L.; Pinney, K. G. Design, Synthesis and Biological Evaluation of Dihydronaphthalene and Benzosuberene Analogs of the Combretastatins as Inhibitors of Tubulin Polymerization in Cancer Chemotherapy. *Bioorg. Med. Chem.* **2008**, *16* (17), 8161–8171.
- (2) Herdman, C. A.; Devkota, L.; Lin, C.-M.; Niu, H.; Strecker, T. E.; Lopez, R.; Liu, L.; George, C. S.; Tanpure, R. P.; Hamel, E.; et al. Structural Interrogation of Benzosuberene-Based Inhibitors of Tubulin Polymerization. *Bioorg. Med. Chem.* **2015**, *23* (24), 7497–7520.
- (3) Tanpure, R. P.; George, C. S.; Sriram, M.; Strecker, T. E.; Tidmore, J. K.; Hamel, E.; Charlton-Sevcik, A. K.; Chaplin, D. J.; Trawick, M. L.; Pinney, K. G. An Amino-Benzosuberene Analogue That Inhibits Tubulin Assembly and Demonstrates Remarkable Cytotoxicity. *MedChemComm* **2012**, *3* (6), 720–724.
- (4) Pinney, K.; Mocharla, V.; Chen, Z.; Garner, C.; Ghatak, A.; Hadimani, M.; Kessler, J.; Dorsey, J.; Edvardsen, K.; Chaplin, D.; et al. Tubulin Binding Agents and Corresponding Prodrug Constructs. US20040043969A1, March 4, 2004.
